# Supplementary material for: Mutational resilience of antiviral restriction favors primate TRIM5α in host-virus evolutionary arms races
Source: eLife. 2020 Sep 15;9:e59988. doi: 10.7554/eLife.59988 (PMC7492085; doi:10.7554/eLife.59988)
Supplement: Figure 1—source data 1. [file elife-59988-fig1-data1.xlsx]

## Sheet: Sheet1
Position	Codons used	AA used	# AA used	Accessible codons	Accessible AA
330	ggg	G		ggg/c/a/t; gag, gcg, gtg; agg, cgg, tgg	G; E, A, V; R, W
	gag	E		gag/a, gac/t; gcg, gtg, ggg; aag, cag, (tag)	E, D; A, V, G; K, Q (stop)
	cag	Q		cac/t, caa/g; ccg, cgg, ctg; aag, gag, (tag)	H, Q; P, R, L; K, E (stop)		Position	AA used	AA accessible (missense)	% accessible
	cgg	R		cgg/a/c/t; cag, ccg, ctg; agg, ggg, tgg	R; Q, P, L; R, G, W		330	5	14	35.7143
	tgg	W		tgg, tgc/t, (tga); (tag), tcg, ttg; agg, cgg, ggg	W, C, (stop); (stop), S, L; R, G		331	2	8	25
	Total		5		G, E, A, V, R, W, D, K, Q, (stop), H, P, L, C, S		332	3	11	27.2727
331	gca	A		gca/c/g/t; gaa, gga, gta; aca, cca, tca	A, E, G, V, T, P, S		333	1	6	16.6667
	tca	S		tca/a/c/g; tta, (taa, tga); aca, cca, gca	S, L, (stop), T, P, A		334	3	14	21.4286
	Total		2		A, E, G, V, T, P, S, L, (stop)		335	5	12	41.6667
332	cga	R		cga/c/t/g; caa, cca, cta; aga, gga, (tga)	R, Q, P, L, R, G, (stop)		336	3	13	23.0769
	caa	Q		caa/g, cac/t; cca, cga, cta; aaa, gaa, (taa)	Q, H; P, R, L; K, E, (stop)		ins 1	2	9	22.2222
	cca	P		cca/c/t/g; caa, cga, cta; aca, gca, tca	P; Q, R, L; T, A, S		ins 2	1	8	12.5
	Total		3		R, Q, P, L, G, (stop), H, K, E, T, A, S		337	3	13	23.0769
333	ggg	G	1	ggg/a/c/t; gag, gcg, gtg; agg, cgg, tgg	G, E, A, V; R, W		338	2	8	25
334	aca	T		aca/c/g/t; aaa, aga, ata; cca, gca, tca	T, K, R, I; P, A, S		ins 20
	aaa	K		aaa/g, aac/t; aca, aga, ata; caa, gaa, (taa)	K, N; T, R, I; Q, E, (stop)		339	5	14	35.7143
	tca	S		tca/a/c/g; tta, (taa, tga); aca, cca, gca	S, L, (stop), T, P, A		340	4	14	28.5714
	Total		3		G, E, A, V, R, W, T, K, I, P, S, N, Q, (stop), L		341	1	8	12.5
335	aga	R		aga/g, agc/t; aaa, aca, ata; cga, gga, (tga)	R, S; K, T, I; G, (stop), R		342	1	7	14.2857
	aca	T		aca/c/g/t; aaa, aga, ata; cca, gca, tca	T, K, R, I; P, A, S
	ata	I		ata/c/t, atg; aaa, aca, aga; cta, gta, tta	I, M; K, T, R; L, V, L
	tta	L		tta/g, ttt/c; (taa, tga), tca; ata, cta, gta	L, F; S, (stop); I, L, V
	tca	S		tca/a/c/g; tta, (taa, tga); aca, cca, gca	S, L, (stop), T, P, A
	Total		5		R, S, K, T, I, G (stop), P, A, M, L, V, F
336	tac	Y		tac/t, (taa/g); tcc, tgc, ttc; aac, cac, gac	Y, (stop); S, C, F; N, H, D
	tat	Y		tat/c, (taa/g); tct, tgt, ttt; aat, cat, gat	Y, (stop); S, C, F; N, H, D
	tct	S		tca/c/g/t; tat, tgt, ttt; act, cct, gct	S; Y, C, F; T, P, A
	ttt	F		ttt/c, tta/g; tat, tct, tgt; att, ctt, gtt	F, L; Y, S, C; I, L, V
	Total		3		Y, (stop), S, C, F, N, H, D, T, P, A, L, I, V
(ins 1)	acg	T		acg/a/t/g; aag, agg, atg; ccg, gcg, tcg	T; K, R, M; P, A, S
	tcg	S		tcg/a/c/t; (tag), tgg, ttg; acg, ccg, gcg	S; (stop), W, L; T, P, A
	Total		2		T, K, R, M, P, A, S, (stop), W, L
(ins 2)	ttt	F	1	ttt/c, tta/g; tat, tct, tgt; att, ctt, gtt	F, L; Y, S, C; I, L, V
337	cag	Q		cac/t, caa/g; ccg, cgg, ctg; aag, gag, (tag)	H, Q; P, R, L; K, E (stop)
	ccg	P		ccg/a/c/t; cag, cgg, ctg; acg, gcg, tcg	P; Q, R, L; T, A, S
	ggg	G		ggg/a/c/t; gag, gcg, gtg; agg, cgg, tgg	G, E, A, V; R, W
	Total		3		H, Q, P, R, L, K, E, (stop), T, A, S, G, V, W
338	aca	T		aca/c/g/t; aaa, aga, ata; cca, gca, tca	T, K, R, I; P, A, S
	tca	S		tca/a/c/g; tta, (taa, tga); aca, cca, gca	S, L, (stop), T, P, A
	Total		2		T, K, R, I, P, A, S, L, (stop)
(ins 20)
339	ttt	F		ttt/c, tta/g; tat, tct, tgt; att, ctt, gtt	F, L; Y, S, C; I, L, V
	tat	Y		tat/c, (taa/g); tct, tgt, ttt; aat, cat, gat	Y, (stop); S, C, F; N, H, D
	ctc	L		ctc/a/g/t; cac, ccc, cgc; atc, gtc, ttc	L; H, P, R; I, V, F
	cac	H		cac/t, caa/g; ccc, cgc, ctc; aac, gac, tac	H, Q; P, R, L; N, D, Y
	cga	R		cga/c/t/g; caa, cca, cta; aga, gga, (tga)	R, Q, P, L, R, G, (stop)
	Total		5		F, L, Y, S, C, I, V, (stop), N, H, D, P, R, Q, G
340	gtg	V		gtg/a/c/t; gag, gcg, ggg; atg, ctg, ttg	V; E, A, G; M, L
	atg	M		atg, ata/c/t; aag, acg, agg; ctg, gtg, ttg	M, I; K, T, R; L, V, L
	acg	T		acg/a/t/g; aag, agg, atg; ccg, gcg, tcg	T; K, R, M; P, A, S
	aag	K		aag/a; aac/t; acg, agg, atg; cag, gag, (tag)	K, N, T, R, M; Q, E, (stop)
	Total		4		V, E, A, G, M, L, I, K, T, R, P, S, N, Q, (stop)
341	aat	N	1	aat/c, aaa/g; act, agt, att; cat, gat, tat	N, K; T, S, I; H, D, Y
342	ttc	F	1	ttt/c, tta/g; tac, tcc, tgc; atc, ctc, gtc	F, L; Y, S, C; I, L, V
