# Supplementary material for: Mutational resilience of antiviral restriction favors primate TRIM5α in host-virus evolutionary arms races
Source: eLife. 2020 Sep 15;9:e59988. doi: 10.7554/eLife.59988 (PMC7492085; doi:10.7554/eLife.59988)
Supplement: Figure 2—source data 1. [file elife-59988-fig2-data1.xlsx]

## Sheet: Human TRIM5
Colony	Site Mutated	AA mutation		Site	# Colonies		# Colonies targeted	# Sites
1	R332	K		G330	4		0	0
2	T338	K		A331	2		1	1
3	R332	N		R332	5		2	3
4	Q337	G		G333	2		3	3
5	G333	S		T334	3		4	1
6	Q337	G		R335	1		5	4
7	T338	T		Y336	2		6	0
8	G333	S		Q337	5		7	0
9	Y336	I		T338	5
10	Q337	L		F339	5
11	F339	L		V340	3
12	F339	F (codon change)		WT	3
13	F339	STOP
14	Y336	G
15	WT			TOTAL	40
16	Q337	A
17	V340	A
18	R332	V
19	F339	L
20	WT
21	R332	R (codon change)
22	V340	E
23	G330	R
24	T338	M
25	T338	S
26	A331	E
27	Q337	G
28	T334	S
29	V340	D
30	R332	R (codon change)
31	G330	H
32	T334	S
33	F339	V
34	T334	STOP
35	WT
36	G330	T
37	T338	S
38	R335	V
39	G330	G (codon change)
40	A331	G

## Sheet: Human TRIM5-R332P
Colony	Site Mutated	AA mutation		Site	# Colonies		# Colonies targeted	# Sites
1	F339	Y		G330	3		0	1
2	G330	G (codon change)		A331	4		1	0
3	F339	F (codon change)		R332	n/a		2	3
4	R335	L		G333	2		3	1
5	T334	G		T334	4		4	3
6	G330	A		R335	6		5	1
7	A331	R		Y336	2		6	1
8	G333	K		Q337	5		7	0
9	F339	L		T338	4		8	1
10	A331	W		F339	8
11	Q337	L		V340	2
12	T338	V		WT	0
13	V340	V (codon change)
14	F339	F (codon change)
15	F339	A		TOTAL	40
16	A331	R
17	G333	W
18	R335	R (codon change)
19	Y336	L
20	A331	L
21	T338	A
22	G330	L
23	T334	A
24	R335	R (codon change)
25	Q337	W
26	T334	P
27	T334	G
28	V340	R
29	R335	E
30	Y336	G
31	Q337	S
32	F339	C
33	T338	K
34	Q337	STOP
35	F339	G
36	R335	G
37	Q337	L
38	F339	A
39	R335	V
40	T338	G

## Sheet: Rhesus TRIM5
Colony	Site Mutated	AA mutation		Site	# Colonies		# Colonies targeted	# Sites
1	G335	P		Q332	5		0	1
2	P341	V		A333	1		1	3
3	P341	D		P334	0		2	3
4	P341	G		G335	4		3	1
5	G335	T		T336	2		4	3
6	L337	C		L337	2		5	2
7	F338	S		F338	4		6	1
8	T344	R		T339	4		7	0
9	Q332	S		F340	2
10	G335	T		P341	5
11	T339	D		S342	3
12	L337	L (codon change)		L343	1
13	T339	V		T344	6
14	T339	N		wt	1
15	T336	A		TOTAL	40
16	T336	R
17	WT	n/a
18	T344	D
19	T344	G
20	P341	L
21	Q332	L
22	G335	K
23	A333	A (codon change)
24	T344	A
25	S342	W
26	L343	S
27	F340	Q
28	T344	S
29	Q332	S
30	P341	STOP
31	F338	A
32	F338	T
33	F338	V
34	T344	E
35	F340	F (codon change)
36	Q332	G
37	S342	R
38	S342	L
39	Q332	R
40	T339	A
