# Supplementary material for: Mutational resilience of antiviral restriction favors primate TRIM5α in host-virus evolutionary arms races
Source: eLife. 2020 Sep 15;9:e59988. doi: 10.7554/eLife.59988 (PMC7492085; doi:10.7554/eLife.59988)
Supplement: Figure 2—source data 2. [file elife-59988-fig2-data2.xlsx]

## Sheet: HsT5-HIV-GOF_Replicates_Fig2CD
dist_codon	seq_aa	mutcod_index	mut_aa	num_nt_seqs	InputA_avg	InputB_avg	SortA_avg	SortB_avg	enrichA_avg	enrichB_avg	enrich_Avg_RepAndAA	enrich_SD_RepAndAA	Enrichment Rank	WT Avg	WT SD
1	AARGTRYQTFVNF	330	A	2	5371.39	5115.83	5513.32	5120.97	1.02986	1.00232	1.01609	0.0183648	91
1	GAAGTRYQTFVNF	332	A	2	3281.26	3343.67	8916.13	9293.09	2.65881	2.7573	2.70806	0.18997	22
1	GARATRYQTFVNF	333	A	2	3358.67	3224.73	6130.96	5979.27	1.63176	1.68831	1.66003	0.251343	57
1	GARGARYQTFVNF	334	A	2	4750.03	4578.78	3093.46	3545.37	0.637193	0.76401	0.700601	0.0861362	117
1	GARGTAYQTFVNF	335	A	2	2127.3	2154.22	6230.2	6164.52	2.95668	2.79726	2.87697	0.345587	17
1	GARGTRAQTFVNF	336	A	2	1191.12	1208.67	1694.54	1675.43	1.24427	1.3589	1.30158	0.475534	66
1	GARGTRYATFVNF	337	A	2	1794.94	1713.29	578.572	575.286	0.291975	0.349386	0.320681	0.0518643	160
1	GARGTRYQAFVNF	338	A	2	4703.58	4361.31	2613.07	2451.4	0.543742	0.555749	0.549745	0.045785	134
1	GARGTRYQTAVNF	339	A	2	5379.65	5185.52	4850.29	4706.23	0.906869	0.931822	0.919346	0.0770895	98
1	GARGTRYQTFANF	340	A	2	2441.07	2580.74	1276.45	1398.59	0.465331	0.513949	0.48964	0.149329	144
1	CARGTRYQTFVNF	330	C	1	3051.08	3580.36	1564.68	1718.66	0.512827	0.480023	0.496425	0.023196	143
1	GCRGTRYQTFVNF	331	C	1	3224.49	2890.72	2449.43	2070.62	0.759633	0.716298	0.737966	0.0306423	109
1	GACGTRYQTFVNF	332	C	1	3982.1	3678.88	11700.2	11168.2	2.93821	3.03575	2.98698	0.0689719	13
1	GARCTRYQTFVNF	333	C	1	1296.4	1227.9	2878.08	2513.15	2.22005	2.04671	2.13338	0.122571	39
1	GARGCRYQTFVNF	334	C	1	2060.2	2333.24	1613.24	1076.48	0.78305	0.461364	0.622207	0.227466	126
1	GARGTCYQTFVNF	335	C	1	2698.08	2806.62	7088.56	7607.36	2.62726	2.71051	2.66888	0.0588668	25
1	GARGTRCQTFVNF	336	C	1	4064.67	3926.38	4233.71	3453.78	1.04159	0.879633	0.96061	0.114519	96
1	GARGTRYCTFVNF	337	C	1	1734.04	1487.41	396.976	277.866	0.228931	0.186812	0.207872	0.029783	176
1	GARGTRYQCFVNF	338	C	1	3670.38	3666.87	777.06	734.802	0.211711	0.20039	0.20605	0.00800527	178
1	GARGTRYQTFCNF	340	C	1	2497.84	2479.82	1351.41	983.853	0.54103	0.396743	0.468887	0.102026	147
1	DARGTRYQTFVNF	330	D	1	2227.42	2523.07	6385.4	5540.86	2.86673	2.19608	2.5314	0.474226	27
1	GDRGTRYQTFVNF	331	D	1	3705.48	3412.16	8931.97	8115.76	2.41048	2.37848	2.39448	0.0226228	30
1	GADGTRYQTFVNF	332	D	1	2528.81	2515.87	7392.63	8152.81	2.92336	3.24056	3.08196	0.224289	11
1	GARDTRYQTFVNF	333	D	1	633.75	699.252	2546.56	2521.38	4.01824	3.60583	3.81203	0.291621	4
1	GARGDRYQTFVNF	334	D	1	3515.56	2962.81	7010.43	6613.22	1.99412	2.23208	2.1131	0.168264	40
1	GARGTDYQTFVNF	335	D	1	2504.04	2455.79	10405.8	11302	4.15563	4.60216	4.3789	0.315748	1
1	GARGTRDQTFVNF	336	D	1	3527.94	3960.02	3870.52	4345.01	1.0971	1.09722	1.09716	8.08479e-05	84
1	GARGTRYDTFVNF	337	D	1	862.891	970.783	2683.81	3093.58	3.11026	3.18669	3.14847	0.0540434	9
1	GARGTRYQDFVNF	338	D	1	3575.42	3618.81	5735.04	5777.56	1.60402	1.59654	1.60028	0.0052887	59
1	GARGTRYQTDVNF	339	D	1	5548.93	4738.57	4016.22	3414.67	0.723783	0.720611	0.722197	0.00224253	112
1	GARGTRYQTFDNF	340	D	1	718.388	802.578	128.806	76.156	0.179299	0.0948892	0.137094	0.0596866	198
1	EARGTRYQTFVNF	330	E	1	6878.36	6970.89	15653.1	16077.1	2.2757	2.30632	2.29101	0.0216516	34
1	GERGTRYQTFVNF	331	E	1	6124.88	5928.02	12990.4	13913.9	2.12093	2.34714	2.23403	0.159957	36
1	GAEGTRYQTFVNF	332	E	1	4231.88	4637.65	18176.4	19261.3	4.29512	4.15324	4.22418	0.100323	2
1	GARETRYQTFVNF	333	E	1	6744.18	6026.54	19230.1	19329.2	2.85137	3.20735	3.02936	0.251715	12
1	GARGERYQTFVNF	334	E	1	2124.2	2513.46	2690.15	2788.96	1.26643	1.10961	1.18802	0.11089	72
1	GARGTEYQTFVNF	335	E	1	4000.68	3553.93	13856.2	14836	3.46345	4.17454	3.81899	0.502811	3
1	GARGTREQTFVNF	336	E	1	3841.72	3731.75	4400.52	5246.53	1.14546	1.40592	1.27569	0.184175	67
1	GARGTRYETFVNF	337	E	1	4169.95	4618.43	6727.48	6837.57	1.61332	1.4805	1.54691	0.0939215	61
1	GARGTRYQEFVNF	338	E	1	4083.25	4154.66	6708.48	7977.85	1.64293	1.92022	1.78157	0.196075	53
1	GARGTRYQTEVNF	339	E	1	8354.36	7665.34	6780.27	6582.35	0.811585	0.858716	0.83515	0.0333263	103
1	GARGTRYQTFENF	340	E	1	1777.39	1999.24	483.551	590.723	0.272057	0.295475	0.283766	0.016559	163
1	FARGTRYQTFVNF	330	F	1	891.792	783.354	422.315	475.46	0.473558	0.606954	0.540256	0.0943254	138
1	GFRGTRYQTFVNF	331	F	1	497.504	324.395	73.9051	100.855	0.148552	0.310902	0.229727	0.114799	170
1	GAFGTRYQTFVNF	332	F	1	1248.92	1117.36	2816.84	2636.64	2.25542	2.35971	2.30756	0.0737409	33
1	GARGFRYQTFVNF	334	F	1	887.663	1141.39	107.69	111.147	0.121319	0.0973782	0.109349	0.0169287	210
1	GARGTFYQTFVNF	335	F	1	1715.46	1749.33	2620.47	2823.95	1.52756	1.6143	1.57093	0.061336	60
1	GARGTRFQTFVNF	336	F	1	1391.36	1309.6	639.807	590.723	0.459843	0.451073	0.455458	0.00620129	149
1	GARGTRYFTFVNF	337	F	1	301.393	338.813	67.5704	24.6992	0.224194	0.0728994	0.148547	0.106981	194
1	GARGTRYQFFVNF	338	F	1	1899.19	2208.29	327.294	218.177	0.172334	0.0987989	0.135566	0.0519972	199
1	GARGTRYQTFFNF	340	F	1	885.599	1076.51	443.431	605.131	0.500713	0.562122	0.531418	0.0434229	139
1	GGRGTRYQTFVNF	331	G	2	10630.3	10453.9	12188	12681	1.14965	1.20936	1.1795	0.0454544	74
1	GAGGTRYQTFVNF	332	G	2	5441.58	5083.39	12475.2	12441.2	2.31032	2.46901	2.38966	0.161709	31
1	GARGGRYQTFVNF	334	G	2	8750.71	8583.26	10399.5	10169.9	1.17607	1.16992	1.173	0.102561	75
1	GARGTGYQTFVNF	335	G	2	4361.94	3973.24	13080.2	12910.5	2.99945	3.25477	3.12711	0.150904	10
1	GARGTRGQTFVNF	336	G	2	6647.15	6462.67	8168.63	8269.1	1.22242	1.27292	1.24767	0.0519024	70
1	GARGTRYGTFVNF	337	G	2	4192.66	4397.36	6236.54	5514.1	1.4292	1.26032	1.34476	0.192611	63
1	GARGTRYQGFVNF	338	G	2	5451.9	5387.36	10301.3	10456	1.88048	1.93746	1.90897	0.057737	47
1	GARGTRYQTFGNF	340	G	2	5369.33	5685.33	4449.09	3972.46	0.838015	0.68186	0.759937	0.114244	105
1	HARGTRYQTFVNF	330	H	1	1550.31	1316.8	796.064	1292.59	0.513486	0.981614	0.74755	0.331017	107
1	GHRGTRYQTFVNF	331	H	1	1246.86	1069.3	810.845	839.774	0.650311	0.785347	0.717829	0.0954849	114
1	GAHGTRYQTFVNF	332	H	1	2243.93	2121.79	5561.89	5011.89	2.47864	2.36211	2.42037	0.0823991	29
1	GARGHRYQTFVNF	334	H	1	1050.75	949.156	388.53	566.024	0.369766	0.596344	0.483055	0.160215	145
1	GARGTHYQTFVNF	335	H	1	945.464	1112.56	2968.88	3610.2	3.14012	3.24497	3.19254	0.0741347	7
1	GARGTRHQTFVNF	336	H	1	381.902	480.586	449.766	516.626	1.1777	1.07499	1.12635	0.0726257	81
1	GARGTRYHTFVNF	337	H	1	914.499	977.992	515.224	796.55	0.563395	0.814476	0.688935	0.177541	119
1	GARGTRYQHFVNF	338	H	1	2200.58	2205.89	1336.63	1560.17	0.607398	0.707275	0.657336	0.0706234	121
1	GARGTRYQTHVNF	339	H	1	933.078	963.574	967.102	670.996	1.03646	0.696362	0.866412	0.240488	99
1	GARGTRYQTFHNF	340	H	1	307.586	418.109	139.364	199.652	0.45309	0.477512	0.465301	0.0172687	148
1	IARGTRYQTFVNF	330	I	1	817.476	874.666	82.3515	51.4567	0.100739	0.0588302	0.0797844	0.0296338	220
1	GIRGTRYQTFVNF	331	I	1	980.558	1057.29	367.414	337.556	0.374699	0.319266	0.346983	0.039197	159
1	GAIGTRYQTFVNF	332	I	1	1207.63	965.977	3040.67	2784.84	2.51787	2.88292	2.7004	0.258132	24
1	GARITRYQTFVNF	333	I	1	66.0587	76.8937	76.0167	78.2142	1.15075	1.01717	1.08396	0.0944497	85
1	GARGIRYQTFVNF	334	I	1	957.85	980.395	86.5746	65.8646	0.0903843	0.0671818	0.078783	0.0164066	221
1	GARGTIYQTFVNF	335	I	1	883.534	1064.5	1883.53	1706.31	2.13181	1.60292	1.86736	0.373979	48
1	GARGTRIQTFVNF	336	I	1	435.574	420.512	190.042	72.0394	0.436302	0.171313	0.303808	0.187375	161
1	GARGTRYITFVNF	337	I	1	462.411	252.307	16.8926	34.9906	0.0365316	0.138682	0.087607	0.0722315	217
1	GARGTRYQIFVNF	338	I	1	3104.76	3376.11	344.187	265.517	0.110858	0.0786457	0.0947518	0.0227775	214
1	GARGTRYQTIVNF	339	I	1	1857.9	1871.88	1915.2	1265.84	1.03084	0.676237	0.853539	0.250743	100
1	GARGTRYQTFINF	340	I	1	658.522	728.087	109.802	199.652	0.16674	0.274215	0.220477	0.0759961	173
1	KARGTRYQTFVNF	330	K	1	3612.58	4008.08	709.489	714.22	0.196394	0.178195	0.187294	0.0128688	183
1	GKRGTRYQTFVNF	331	K	1	3077.92	2994.05	665.146	547.5	0.216103	0.182863	0.199483	0.0235041	181
1	GAKGTRYQTFVNF	332	K	1	1907.44	1968	2432.54	2760.14	1.27529	1.40251	1.3389	0.0899624	64
1	GARKTRYQTFVNF	333	K	1	608.978	744.908	572.237	382.838	0.939667	0.51394	0.726804	0.301034	110
1	GARGKRYQTFVNF	334	K	1	1467.74	1326.42	367.414	100.855	0.250326	0.0760359	0.163181	0.123242	190
1	GARGTKYQTFVNF	335	K	1	2184.06	2302	3376.41	3472.3	1.54593	1.50838	1.52716	0.0265507	62
1	GARGTRKQTFVNF	336	K	1	858.762	990.006	1252.16	1835.98	1.4581	1.85451	1.65631	0.280302	58
1	GARGTRYKTFVNF	337	K	1	2826.07	3018.08	574.349	619.539	0.203232	0.205276	0.204254	0.00144531	180
1	GARGTRYQKFVNF	338	K	1	3876.82	4169.08	979.771	798.609	0.252726	0.191555	0.22214	0.0432541	172
1	GARGTRYQTKVNF	339	K	1	3645.61	3340.07	838.296	913.872	0.229946	0.273609	0.251778	0.0308738	169
1	GARGTRYQTFKNF	340	K	1	1317.04	1340.83	185.819	279.925	0.141088	0.208769	0.174928	0.047858	187
1	LARGTRYQTFVNF	330	L	3	1972.13	2120.18	250.574	329.323	0.113822	0.151433	0.132628	0.0442809	201
1	GLRGTRYQTFVNF	331	L	3	1416.13	1408.92	1007.22	990.028	0.733335	0.597615	0.665475	0.220081	120
1	GALGTRYQTFVNF	332	L	3	2215.03	1971.2	3766.35	3828.38	1.71893	1.89464	1.80678	0.195311	51
1	GARLTRYQTFVNF	333	L	3	638.567	631.169	1183.19	1005.81	1.25647	1.25179	1.25413	0.700759	69
1	GARGLRYQTFVNF	334	L	3	1352.14	1388.89	323.775	304.624	0.234787	0.221325	0.228056	0.0482494	171
1	GARGTLYQTFVNF	335	L	3	2114.56	2299.6	5316.24	5586.83	2.67512	2.54846	2.61179	0.433684	26
1	GARGTRLQTFVNF	336	L	3	586.271	678.427	180.892	244.934	0.357254	0.413936	0.385595	0.0835736	155
1	GARGTRYLTFVNF	337	L	3	2526.06	2310.82	301.955	333.44	0.0839527	0.13521	0.109581	0.0698783	209
1	GARGTRYQLFVNF	338	L	3	3708.92	3789.42	297.028	273.064	0.0753779	0.0671933	0.0712856	0.0223626	223
1	GARGTRYQTLVNF	339	L	3	4091.51	4194.71	4305.5	4798.51	1.02381	1.13567	1.07974	0.0810055	86
1	GARGTRYQTFLNF	340	L	3	2239.11	2533.49	1172.63	1130.68	0.574211	0.48709	0.53065	0.0944806	140
1	MARGTRYQTFVNF	330	M	1	2642.35	2575.94	363.191	528.975	0.13745	0.205352	0.171401	0.0480141	188
1	GMRGTRYQTFVNF	331	M	1	3577.49	3623.62	2529.67	2642.82	0.707107	0.729332	0.71822	0.0157154	113
1	GAMGTRYQTFVNF	332	M	1	2528.81	2679.26	7088.56	7819.37	2.80312	2.91848	2.8608	0.0815661	18
1	GARMTRYQTFVNF	333	M	1	933.078	749.713	1471.77	1712.48	1.57733	2.28418	1.93075	0.499822	43
1	GARGMRYQTFVNF	334	M	1	2157.23	2277.98	692.597	940.629	0.321059	0.412923	0.366991	0.0649581	157
1	GARGTMYQTFVNF	335	M	1	3530.01	3181.48	7907.85	6660.56	2.24018	2.09354	2.16686	0.103686	38
1	GARGTRMQTFVNF	336	M	1	547.048	809.787	458.212	463.111	0.837608	0.571892	0.70475	0.187889	116
1	GARGTRYMTFVNF	337	M	1	2423.53	2299.6	306.178	308.74	0.126336	0.134258	0.130297	0.00560191	203
1	GARGTRYQMFVNF	338	M	1	5043.17	4954.84	652.477	761.56	0.129378	0.1537	0.141539	0.0171981	196
1	GARGTRYQTMVNF	339	M	1	3600.2	3568.35	4058.45	3560.81	1.12729	0.997887	1.06259	0.0914986	88
1	GARGTRYQTFMNF	340	M	1	1849.64	1992.03	665.146	922.105	0.359608	0.462898	0.411253	0.0730368	153
1	NARGTRYQTFVNF	330	N	1	854.634	1131.78	893.197	705.986	1.04512	0.623785	0.834453	0.29793	104
1	GNRGTRYQTFVNF	331	N	1	687.423	732.893	673.593	718.336	0.979881	0.980138	0.980009	0.000181539	93
1	GANGTRYQTFVNF	332	N	1	1023.91	1076.51	1955.32	2078.85	1.90966	1.9311	1.92038	0.0151603	45
1	GARGNRYQTFVNF	334	N	1	1771.2	1609.96	1915.2	2210.58	1.0813	1.37306	1.22718	0.206308	71
1	GARGTNYQTFVNF	335	N	1	1145.7	934.739	3118.8	3394.09	2.72216	3.63105	3.17661	0.642681	8
1	GARGTRNQTFVNF	336	N	1	677.101	730.49	768.614	841.832	1.13515	1.15242	1.14379	0.0122104	78
1	GARGTRYNTFVNF	337	N	1	458.282	571.897	916.424	885.056	1.99969	1.54758	1.77364	0.319693	54
1	GARGTRYQNFVNF	338	N	1	2809.56	2809.02	2911.86	2986.55	1.03641	1.0632	1.04981	0.01894	89
1	GARGTRYQTNVNF	339	N	1	1738.17	1545.08	1399.97	1339.93	0.805431	0.867225	0.836328	0.0436946	102
1	GARGTRYQTFNNF	340	N	1	216.755	321.992	149.922	253.167	0.691665	0.786252	0.738959	0.0668831	108
1	PARGTRYQTFVNF	330	P	2	2002.4	1780.57	3683.64	3891.16	1.67439	1.97267	1.82353	0.453067	50
1	GPRGTRYQTFVNF	331	P	2	884.567	771.34	177.372	150.254	0.208386	0.220418	0.214402	0.0450029	174
1	GAPGTRYQTFVNF	332	P	2	2580.42	2527.88	9561.21	9859.11	3.64908	3.82462	3.73685	0.318781	5
1	GARPTRYQTFVNF	333	P	1	611.043	461.362	1119.14	969.445	1.83152	2.10127	1.96639	0.190742	41
1	GARGPRYQTFVNF	334	P	2	1076.55	1070.5	1313.4	1314.21	1.35167	1.30725	1.32946	0.194747	65
1	GARGTPYQTFVNF	335	P	2	1386.2	1251.93	4028.89	3873.66	2.68209	3.09145	2.88677	0.44474	15
1	GARGTRPQTFVNF	336	P	1	152.761	141.773	59.1241	267.575	0.387038	1.88735	1.13719	1.06088	79
1	GARGTRYPTFVNF	337	P	2	904.178	901.098	1073.74	1126.9	1.09059	1.28117	1.18588	0.167234	73
1	GARGTRYQPFVNF	338	P	2	1675.21	1509.04	660.923	656.588	0.409151	0.38194	0.395545	0.0834531	154
1	GARGTRYQTPVNF	339	P	2	1406.84	1153.41	1334.52	1416.09	1.01092	1.13579	1.07335	0.200413	87
1	GARGTRYQTFPNF	340	P	2	835.023	621.157	449.766	524.859	0.677626	0.838099	0.757863	0.19361	106
1	QARGTRYQTFVNF	330	Q	1	3278.16	3638.03	3851.51	4054.79	1.1749	1.11456	1.14473	0.0426703	77
1	GQRGTRYQTFVNF	331	Q	1	2832.26	2895.53	2219.27	1926.54	0.783566	0.66535	0.724458	0.083591	111
1	GAQGTRYQTFVNF	332	Q	1	2120.07	2071.32	6414.97	5761.1	3.02583	2.78136	2.90359	0.172865	14
1	GARQTRYQTFVNF	333	Q	1	968.172	740.102	1473.88	1722.77	1.52233	2.32775	1.92504	0.569516	44
1	GARGQRYQTFVNF	334	Q	1	1304.66	1158.21	221.715	156.428	0.169941	0.13506	0.152501	0.0246646	192
1	GARGTQYQTFVNF	335	Q	1	3094.43	3157.45	7529.88	6432.09	2.43336	2.03712	2.23524	0.280186	35
1	GARGTRQQTFVNF	336	Q	1	681.23	809.787	962.878	901.522	1.41344	1.11328	1.26336	0.212244	68
1	GARGTRYQQFVNF	338	Q	1	3938.75	3902.35	3798.72	3830.44	0.96445	0.981571	0.973011	0.0121067	95
1	GARGTRYQTQVNF	339	Q	1	3131.59	3219.92	3127.24	3054.47	0.998611	0.948616	0.973614	0.0353516	94
1	GARGTRYQTFQNF	340	Q	1	1178.73	1439.35	304.067	485.752	0.257961	0.337479	0.29772	0.056228	162
1	RARGTRYQTFVNF	330	R	3	6116.62	5987.29	1157.14	940.629	0.194111	0.160564	0.177337	0.048397	186
1	GRRGTRYQTFVNF	331	R	3	6692.57	6834.73	874.896	839.088	0.123135	0.113274	0.118205	0.04267	208
1	GARRTRYQTFVNF	333	R	3	5797.33	5775.84	2650.03	2336.14	0.462403	0.375679	0.419041	0.0664074	152
1	GARGRRYQTFVNF	334	R	3	3311.19	3392.13	420.907	536.522	0.127997	0.158171	0.143084	0.0201274	195
1	GARGTRRQTFVNF	336	R	3	2085.66	2367.68	1490.07	1554.68	0.729099	0.657766	0.693432	0.0809394	118
1	GARGTRYRTFVNF	337	R	3	3726.12	3931.19	511.001	528.975	0.13782	0.136527	0.137173	0.0269909	197
1	GARGTRYQRFVNF	338	R	3	8533.95	9156.76	1278.91	1162.24	0.162381	0.159128	0.160754	0.0510115	191
1	GARGTRYQTFRNF	340	R	3	3138.47	3110.19	470.178	439.784	0.141169	0.125829	0.133499	0.049642	200
1	SARGTRYQTFVNF	330	S	3	2227.42	2306.01	612.357	522.114	0.262725	0.244985	0.253855	0.0591465	168
1	GSRGTRYQTFVNF	331	S	3	2348.52	2128.19	1333.11	1383.16	0.485184	0.749268	0.617226	0.191706	128
1	GASGTRYQTFVNF	332	S	3	2443.48	2297.2	6104.57	6049.25	2.50391	2.46699	2.48545	0.398037	28
1	GARSTRYQTFVNF	333	S	2	793.736	831.413	1407.37	1404.77	1.75917	1.68332	1.72124	0.305305	56
1	GARGSRYQTFVNF	334	S	3	2312.05	2430.96	2678.18	2488.45	1.18301	1.03597	1.10949	0.172764	82
1	GARGTSYQTFVNF	335	S	3	1956.3	2058.51	5612.57	5409.13	2.87101	2.68348	2.77725	0.25269	21
1	GARGTRSQTFVNF	336	S	3	1136.07	1066.9	863.634	872.02	0.733875	0.957734	0.845804	0.31049	101
1	GARGTRYSTFVNF	337	S	3	961.979	1079.72	1105.76	1263.78	1.0469	1.22155	1.13422	0.2177	80
1	GARGTRYQSFVNF	338	S	3	2846.03	2788.2	1542.86	1529.29	0.570206	0.551388	0.560797	0.0915499	132
1	GARGTRYQTSVNF	339	S	2	2736.27	2637.21	2192.87	2394.8	0.86898	1.0288	0.94889	0.223189	97
1	GARGTRYQTFSNF	340	S	3	1184.24	1199.06	733.421	657.274	0.734473	0.552699	0.643586	0.227894	123
1	*ARGTRYQTFVNF	330	STOP	1	3860.3	3549.12	950.209	1035.31	0.246149	0.291708	0.268929	0.0322155	166
1	G*RGTRYQTFVNF	331	STOP	1	1176.67	1086.12	217.492	61.7481	0.184837	0.0568518	0.120844	0.0904993	206
1	GA*GTRYQTFVNF	332	STOP	1	1403.75	1646.01	247.054	267.575	0.175996	0.16256	0.169278	0.00950082	189
1	GAR*TRYQTFVNF	333	STOP	1	714.259	504.615	116.137	131.729	0.162597	0.261049	0.211823	0.0696159	175
1	GARG*RYQTFVNF	334	STOP	1	1059	1064.5	306.178	251.109	0.28912	0.235894	0.262507	0.0376359	167
1	GARGT*YQTFVNF	335	STOP	1	1659.72	1578.72	458.212	434.295	0.276077	0.275092	0.275585	0.000696366	165
1	GARGTR*QTFVNF	336	STOP	1	1959.05	1857.46	380.084	403.421	0.194014	0.217189	0.205602	0.0163873	179
1	GARGTRY*TFVNF	337	STOP	1	2179.94	2585.55	209.046	181.128	0.0958955	0.0700538	0.0829747	0.0182728	219
1	GARGTRYQ*FVNF	338	STOP	1	3812.82	3489.05	396.976	496.043	0.104116	0.142171	0.123144	0.0269091	205
1	GARGTRYQT*VNF	339	STOP	1	3451.56	3224.73	530.005	477.519	0.153555	0.14808	0.150818	0.00387136	193
1	GARGTRYQTF*NF	340	STOP	1	1783.58	1713.29	234.385	216.118	0.131412	0.126142	0.128777	0.00372636	204
1	GARGTRYQTFVNF	330	syn	1	6430.4	6149.09	2880.19	4326.48	0.447902	0.703597	0.57575	0.180803	130	0.579793	0.0494565
1	GARGTRYQTFVNF	331	syn	2	4279.36	4225.55	2360.74	2195.14	0.580529	0.510928	0.545729	0.0908242	135
1	GARGTRYQTFVNF	332	syn	3	3780.48	3684.49	2603.57	2314.18	0.680089	0.621783	0.650936	0.104194	122
1	GARGTRYQTFVNF	333	syn	1	5753.3	6175.52	3625.58	3791.33	0.630174	0.613929	0.622051	0.0114868	127
1	GARGTRYQTFVNF	334	syn	2	2656.8	2607.18	1406.31	1344.05	0.560464	0.525165	0.542814	0.076193	137
1	GARGTRYQTFVNF	335	syn	3	2868.05	2987.64	1896.19	1812.65	0.644056	0.614785	0.629421	0.103225	125
1	GARGTRYQTFVNF	338	syn	2	4312.39	4125.83	2331.18	2061.36	0.524694	0.507109	0.515901	0.0473711	142
1	GARGTRYQTFVNF	339	syn	1	3024.25	3157.45	1775.84	1677.49	0.587199	0.53128	0.55924	0.0395404	133
1	GARGTRYQTFVNF	340	syn	1	3125.4	2929.17	1699.82	1481.95	0.543872	0.50593	0.524901	0.0268293	141
0	GARGTRYQTFVNF	NA	syn	1	58963.5	61380.4	38872	37020	0.659255	0.603125	0.63119	0.0396899	124
1	TARGTRYQTFVNF	330	T	2	1417.16	1595.54	257.612	271.692	0.105577	0.108177	0.106877	0.114597	211
1	GTRGTRYQTFVNF	331	T	2	2060.2	1987.22	1710.38	1459.31	0.680702	0.752301	0.716502	0.184039	115
1	GATGTRYQTFVNF	332	T	2	1494.58	1483.81	4288.61	4213.28	2.96189	2.73115	2.84652	0.339351	19
1	GARTTRYQTFVNF	333	T	1	999.137	1018.84	1750.5	2109.73	1.75201	2.07071	1.91136	0.225357	46
1	GARGTTYQTFVNF	335	T	2	1085.84	1433.35	3476.71	3307.64	3.45829	2.1981	2.8282	0.82254	20
1	GARGTRTQTFVNF	336	T	2	300.36	368.849	363.191	328.294	1.40894	0.911466	1.1602	0.48793	76
1	GARGTRYTTFVNF	337	T	2	969.204	908.307	476.16	405.479	0.356626	0.494908	0.425767	0.167554	151
1	GARGTRYQTTVNF	339	T	2	1558.57	1489.82	1554.12	1519	1.10602	0.989975	1.048	0.152772	90
1	GARGTRYQTFTNF	340	T	2	900.049	854.241	521.559	371.518	0.559428	0.384015	0.471721	0.123399	146
1	VARGTRYQTFVNF	330	V	2	3991.39	4036.92	497.276	274.779	0.137617	0.0701212	0.103869	0.0546144	212
1	GVRGTRYQTFVNF	331	V	2	5634.6	5296.05	3082.9	3350.86	0.568294	0.661578	0.614936	0.0881746	129
1	GAVGTRYQTFVNF	332	V	2	3421.63	3632.03	9866.34	10567.2	2.82668	2.93877	2.88272	0.242011	16
1	GARVTRYQTFVNF	333	V	2	5284.69	5149.47	9204.36	8659.14	1.79319	1.81345	1.80332	0.152667	52
1	GARGVRYQTFVNF	334	V	2	3312.22	2965.21	607.078	395.188	0.206817	0.157424	0.182121	0.116584	184
1	GARGTVYQTFVNF	335	V	2	2970.57	2995.25	6605.01	6942.54	2.19243	2.24209	2.21726	0.201416	37
1	GARGTRVQTFVNF	336	V	2	2147.94	2185.46	1214.16	1243.19	0.544542	0.544588	0.544565	0.14492	136
1	GARGTRYVTFVNF	337	V	2	3011.86	3193.49	268.17	195.536	0.107255	0.0768943	0.0920747	0.0356917	215
1	GARGTRYQVFVNF	338	V	2	7197.3	7017.75	654.588	662.763	0.0890239	0.0920534	0.0905386	0.0120804	216
1	GARGTRYQTVVNF	339	V	2	7837.24	8090.66	8832.72	8370.98	1.15515	1.04264	1.0989	0.100474	83
1	WARGTRYQTFVNF	330	W	1	6752.43	6411.01	3933.87	3626.67	0.582585	0.565694	0.574139	0.0119436	131
1	GWRGTRYQTFVNF	331	W	1	3368.99	3114.19	1467.55	1416.09	0.435604	0.454721	0.445162	0.013518	150
1	GAWGTRYQTFVNF	332	W	1	5606.73	5298.46	14525.5	14895.7	2.59073	2.81133	2.70103	0.155985	23
1	GARWTRYQTFVNF	333	W	1	12421.1	12187.6	22044.8	23283.1	1.77479	1.91039	1.84259	0.0958814	49
1	GARGWRYQTFVNF	334	W	1	5670.72	5327.29	574.349	856.24	0.101283	0.160727	0.131005	0.0420332	202
1	GARGTWYQTFVNF	335	W	1	4679.84	4378.13	9791.38	11742.4	2.09224	2.68206	2.38715	0.417064	32
1	GARGTRWQTFVNF	336	W	1	5330.11	5908.8	1199.37	1123.82	0.225019	0.190193	0.207606	0.0246253	177
1	GARGTRYWTFVNF	337	W	1	5804.9	5824.7	409.646	428.12	0.0705689	0.0735008	0.0720349	0.00207319	222
1	GARGTRYQWFVNF	338	W	1	6607.93	7151.11	880.527	769.793	0.133253	0.107647	0.12045	0.0181065	207
1	GARGTRYQTFWNF	340	W	1	5373.46	4664.08	1758.94	1722.77	0.327339	0.36937	0.348354	0.0297203	158
1	YARGTRYQTFVNF	330	Y	1	1145.7	1331.22	384.307	300.507	0.335433	0.225738	0.280585	0.0775658	164
1	GYRGTRYQTFVNF	331	Y	1	656.458	615.149	164.703	80.2725	0.250896	0.130493	0.190695	0.0851383	182
1	GAYGTRYQTFVNF	332	Y	1	1075.52	997.215	3355.29	4065.08	3.1197	4.07644	3.59807	0.676513	6
1	GARYTRYQTFVNF	333	Y	1	113.538	132.161	261.835	207.885	2.30614	1.57297	1.93956	0.518431	42
1	GARGYRYQTFVNF	334	Y	1	809.218	1006.83	154.145	166.72	0.190486	0.165589	0.178038	0.0176048	185
1	GARGTYYQTFVNF	335	Y	1	1296.4	1523.46	2719.71	2157.07	2.09789	1.4159	1.7569	0.482239	55
1	GARGTRYYTFVNF	337	Y	1	268.363	451.75	2.11158	82.3308	0.00786835	0.182248	0.0950584	0.123305	213
1	GARGTRYQYFVNF	338	Y	1	2656.8	2722.52	244.943	214.06	0.0921948	0.0786258	0.0854103	0.00959473	218
1	GARGTRYQTYVNF	339	Y	1	2291.41	2746.55	2903.42	2021.22	1.26709	0.735914	1.0015	0.375597	92
1	GARGTRYQTFYNF	340	Y	1	879.406	831.413	354.745	296.391	0.403391	0.35649	0.379941	0.0331639	156

## Sheet: HsT5-HIV-GOF_Matrix_Fig3A-C
Position	G	P	A	I	L	V	F	W	Y	M	C	S	T	N	Q	H	K	R	D	E	stop
G330	0.57575	1.82353	1.01609	0.0797844	0.132628	0.103869	0.540256	0.574139	0.280585	0.171401	0.496425	0.253855	0.106877	0.834453	1.14473	0.74755	0.187294	0.177337	2.5314	2.29101	0.268929
A331	1.1795	0.214402	0.545729	0.346983	0.665475	0.614936	0.229727	0.445162	0.190695	0.71822	0.737966	0.617226	0.716502	0.980009	0.724458	0.717829	0.199483	0.118205	2.39448	2.23403	0.120844
R332	2.38966	3.73685	2.70806	2.7004	1.80678	2.88272	2.30756	2.70103	3.59807	2.8608	2.98698	2.48545	2.84652	1.92038	2.90359	2.42037	1.3389	0.650936	3.08196	4.22418	0.169278
G333	0.622051	1.96639	1.66003	1.08396	1.25413	1.80332	NA	1.84259	1.93956	1.93075	2.13338	1.72124	1.91136	NA	1.92504	NA	0.726804	0.419041	3.81203	3.02936	0.211823
T334	1.173	1.32946	0.700601	0.078783	0.228056	0.182121	0.109349	0.131005	0.178038	0.366991	0.622207	1.10949	0.542814	1.22718	0.152501	0.483055	0.163181	0.143084	2.1131	1.18802	0.262507
R335	3.12711	2.88677	2.87697	1.86736	2.61179	2.21726	1.57093	2.38715	1.7569	2.16686	2.66888	2.77725	2.8282	3.17661	2.23524	3.19254	1.52716	0.629421	4.3789	3.81899	0.275585
Y336	1.24767	1.13719	1.30158	0.303808	0.385595	0.544565	0.455458	0.207606	0.63119	0.70475	0.96061	0.845804	1.1602	1.14379	1.26336	1.12635	1.65631	0.693432	1.09716	1.27569	0.205602
Q337	1.34476	1.18588	0.320681	0.087607	0.109581	0.0920747	0.148547	0.0720349	0.0950584	0.130297	0.207872	1.13422	0.425767	1.77364	0.63119	0.688935	0.204254	0.137173	3.14847	1.54691	0.0829747
T338	1.90897	0.395545	0.549745	0.0947518	0.0712856	0.0905386	0.135566	0.12045	0.0854103	0.141539	0.20605	0.560797	0.515901	1.04981	0.973011	0.657336	0.22214	0.160754	1.60028	1.78157	0.123144
F339	NA	1.07335	0.919346	0.853539	1.07974	1.0989	0.55924	NA	1.0015	1.06259	NA	0.94889	1.048	0.836328	0.973614	0.866412	0.251778	NA	0.722197	0.83515	0.150818
V340	0.759937	0.757863	0.48964	0.220477	0.53065	0.524901	0.531418	0.348354	0.379941	0.411253	0.468887	0.643586	0.471721	0.738959	0.29772	0.465301	0.174928	0.133499	0.137094	0.283766	0.128777
	NB: WT bolded; Y336Y & Q337Q values are identical as they have identical nucleotide sequences
	NA: excluded due to low read counts in input library

## Sheet: HsT5-HIV-GOF_By Charge_Fig3D
Charge	dist_codon	seq_aa	mutcod_index	mut_aa	num_nt_seqs	InputA_avg	InputB_avg	SortA_avg	SortB_avg	enrichA_avg	enrichB_avg	enrich_Avg_RepAndAA	enrich_SD_RepAndAA	Enrichment Rank
missense +2
	1	AARGTRYQTFVNF	330	A	2	5371.39	5115.83	5513.32	5120.97	1.02986	1.00232	1.01609	0.0183648	91
	1	GARATRYQTFVNF	333	A	2	3358.67	3224.73	6130.96	5979.27	1.63176	1.68831	1.66003	0.251343	57
	1	GARGARYQTFVNF	334	A	2	4750.03	4578.78	3093.46	3545.37	0.637193	0.76401	0.700601	0.0861362	117
	1	GARGTRAQTFVNF	336	A	2	1191.12	1208.67	1694.54	1675.43	1.24427	1.3589	1.30158	0.475534	66
	1	GARGTRYATFVNF	337	A	2	1794.94	1713.29	578.572	575.286	0.291975	0.349386	0.320681	0.0518643	160
	1	GARGTRYQAFVNF	338	A	2	4703.58	4361.31	2613.07	2451.4	0.543742	0.555749	0.549745	0.045785	134
	1	GARGTRYQTAVNF	339	A	2	5379.65	5185.52	4850.29	4706.23	0.906869	0.931822	0.919346	0.0770895	98
	1	GARGTRYQTFANF	340	A	2	2441.07	2580.74	1276.45	1398.59	0.465331	0.513949	0.48964	0.149329	144
	1	CARGTRYQTFVNF	330	C	1	3051.08	3580.36	1564.68	1718.66	0.512827	0.480023	0.496425	0.023196	143
	1	GCRGTRYQTFVNF	331	C	1	3224.49	2890.72	2449.43	2070.62	0.759633	0.716298	0.737966	0.0306423	109
	1	GARCTRYQTFVNF	333	C	1	1296.4	1227.9	2878.08	2513.15	2.22005	2.04671	2.13338	0.122571	39
	1	GARGCRYQTFVNF	334	C	1	2060.2	2333.24	1613.24	1076.48	0.78305	0.461364	0.622207	0.227466	126
	1	GARGTRCQTFVNF	336	C	1	4064.67	3926.38	4233.71	3453.78	1.04159	0.879633	0.96061	0.114519	96
	1	GARGTRYCTFVNF	337	C	1	1734.04	1487.41	396.976	277.866	0.228931	0.186812	0.207872	0.029783	176
	1	GARGTRYQCFVNF	338	C	1	3670.38	3666.87	777.06	734.802	0.211711	0.20039	0.20605	0.00800527	178
	1	GARGTRYQTFCNF	340	C	1	2497.84	2479.82	1351.41	983.853	0.54103	0.396743	0.468887	0.102026	147
	1	FARGTRYQTFVNF	330	F	1	891.792	783.354	422.315	475.46	0.473558	0.606954	0.540256	0.0943254	138
	1	GFRGTRYQTFVNF	331	F	1	497.504	324.395	73.9051	100.855	0.148552	0.310902	0.229727	0.114799	170
	1	GARGFRYQTFVNF	334	F	1	887.663	1141.39	107.69	111.147	0.121319	0.0973782	0.109349	0.0169287	210
	1	GARGTRFQTFVNF	336	F	1	1391.36	1309.6	639.807	590.723	0.459843	0.451073	0.455458	0.00620129	149
	1	GARGTRYFTFVNF	337	F	1	301.393	338.813	67.5704	24.6992	0.224194	0.0728994	0.148547	0.106981	194
	1	GARGTRYQFFVNF	338	F	1	1899.19	2208.29	327.294	218.177	0.172334	0.0987989	0.135566	0.0519971	199
	1	GARGTRYQTFFNF	340	F	1	885.599	1076.51	443.431	605.131	0.500713	0.562122	0.531418	0.0434229	139
	1	GGRGTRYQTFVNF	331	G	2	10630.3	10453.9	12188	12681	1.14965	1.20936	1.1795	0.0454544	74
	1	GARGGRYQTFVNF	334	G	2	8750.71	8583.26	10399.5	10169.9	1.17607	1.16992	1.173	0.102561	75
	1	GARGTRGQTFVNF	336	G	2	6647.15	6462.67	8168.63	8269.1	1.22242	1.27292	1.24767	0.0519024	70
	1	GARGTRYGTFVNF	337	G	2	4192.66	4397.36	6236.54	5514.1	1.4292	1.26032	1.34476	0.192611	63
	1	GARGTRYQGFVNF	338	G	2	5451.9	5387.36	10301.3	10456	1.88048	1.93746	1.90897	0.057737	47
	1	GARGTRYQTFGNF	340	G	2	5369.33	5685.33	4449.09	3972.46	0.838015	0.68186	0.759937	0.114244	105
	1	HARGTRYQTFVNF	330	H	1	1550.31	1316.8	796.064	1292.59	0.513486	0.981614	0.74755	0.331017	107
	1	GHRGTRYQTFVNF	331	H	1	1246.86	1069.3	810.845	839.774	0.650311	0.785347	0.717829	0.0954849	114
	1	GARGHRYQTFVNF	334	H	1	1050.75	949.156	388.53	566.024	0.369766	0.596344	0.483055	0.160215	145
	1	GARGTRHQTFVNF	336	H	1	381.902	480.586	449.766	516.626	1.1777	1.07499	1.12635	0.0726257	81
	1	GARGTRYHTFVNF	337	H	1	914.499	977.992	515.224	796.55	0.563395	0.814476	0.688935	0.177541	119
	1	GARGTRYQHFVNF	338	H	1	2200.58	2205.89	1336.63	1560.17	0.607398	0.707275	0.657336	0.0706234	121
	1	GARGTRYQTHVNF	339	H	1	933.078	963.574	967.102	670.996	1.03646	0.696362	0.866412	0.240488	99
	1	GARGTRYQTFHNF	340	H	1	307.586	418.109	139.364	199.652	0.45309	0.477512	0.465301	0.0172687	148
	1	IARGTRYQTFVNF	330	I	1	817.476	874.666	82.3515	51.4567	0.100739	0.0588302	0.0797844	0.0296338	220
	1	GIRGTRYQTFVNF	331	I	1	980.558	1057.29	367.414	337.556	0.374699	0.319266	0.346983	0.039197	159
	1	GARITRYQTFVNF	333	I	1	66.0587	76.8937	76.0167	78.2142	1.15075	1.01717	1.08396	0.0944497	85
	1	GARGIRYQTFVNF	334	I	1	957.85	980.395	86.5746	65.8646	0.0903843	0.0671818	0.078783	0.0164066	221
	1	GARGTRIQTFVNF	336	I	1	435.574	420.512	190.042	72.0394	0.436302	0.171313	0.303808	0.187375	161
	1	GARGTRYITFVNF	337	I	1	462.411	252.307	16.8926	34.9906	0.0365316	0.138682	0.087607	0.0722315	217
	1	GARGTRYQIFVNF	338	I	1	3104.76	3376.11	344.187	265.517	0.110858	0.0786457	0.0947518	0.0227775	214
	1	GARGTRYQTIVNF	339	I	1	1857.9	1871.88	1915.2	1265.84	1.03084	0.676237	0.853539	0.250743	100
	1	GARGTRYQTFINF	340	I	1	658.522	728.087	109.802	199.652	0.16674	0.274215	0.220477	0.0759961	173
	1	GAKGTRYQTFVNF	332	K	1	1907.44	1968	2432.54	2760.14	1.27529	1.40251	1.3389	0.0899624	64
	1	GARGTKYQTFVNF	335	K	1	2184.06	2302	3376.41	3472.3	1.54593	1.50838	1.52716	0.0265507	62
	1	LARGTRYQTFVNF	330	L	3	1972.13	2120.18	250.574	329.323	0.113822	0.151433	0.132628	0.0442809	201
	1	GLRGTRYQTFVNF	331	L	3	1416.13	1408.92	1007.22	990.028	0.733335	0.597615	0.665475	0.220081	120
	1	GARLTRYQTFVNF	333	L	3	638.567	631.169	1183.19	1005.81	1.25647	1.25179	1.25413	0.700759	69
	1	GARGLRYQTFVNF	334	L	3	1352.14	1388.89	323.775	304.624	0.234787	0.221325	0.228056	0.0482494	171
	1	GARGTRLQTFVNF	336	L	3	586.271	678.427	180.892	244.934	0.357254	0.413936	0.385595	0.0835736	155
	1	GARGTRYLTFVNF	337	L	3	2526.06	2310.82	301.955	333.44	0.0839527	0.13521	0.109581	0.0698783	209
	1	GARGTRYQLFVNF	338	L	3	3708.92	3789.42	297.028	273.064	0.0753779	0.0671933	0.0712856	0.0223626	223
	1	GARGTRYQTLVNF	339	L	3	4091.51	4194.71	4305.5	4798.51	1.02381	1.13567	1.07974	0.0810055	86
	1	GARGTRYQTFLNF	340	L	3	2239.11	2533.49	1172.63	1130.68	0.574211	0.48709	0.53065	0.0944806	140
	1	MARGTRYQTFVNF	330	M	1	2642.35	2575.94	363.191	528.975	0.13745	0.205352	0.171401	0.0480141	188
	1	GMRGTRYQTFVNF	331	M	1	3577.49	3623.62	2529.67	2642.82	0.707107	0.729332	0.71822	0.0157154	113
	1	GARMTRYQTFVNF	333	M	1	933.078	749.713	1471.77	1712.48	1.57733	2.28418	1.93075	0.499822	43
	1	GARGMRYQTFVNF	334	M	1	2157.23	2277.98	692.597	940.629	0.321059	0.412923	0.366991	0.0649581	157
	1	GARGTRMQTFVNF	336	M	1	547.048	809.787	458.212	463.111	0.837608	0.571892	0.70475	0.187889	116
	1	GARGTRYMTFVNF	337	M	1	2423.53	2299.6	306.178	308.74	0.126336	0.134258	0.130297	0.00560191	203
	1	GARGTRYQMFVNF	338	M	1	5043.17	4954.84	652.477	761.56	0.129378	0.1537	0.141539	0.0171981	196
	1	GARGTRYQTMVNF	339	M	1	3600.2	3568.35	4058.45	3560.81	1.12729	0.997887	1.06259	0.0914986	88
	1	GARGTRYQTFMNF	340	M	1	1849.64	1992.03	665.146	922.105	0.359608	0.462898	0.411253	0.0730368	153
	1	NARGTRYQTFVNF	330	N	1	854.634	1131.78	893.197	705.986	1.04512	0.623785	0.834453	0.29793	104
	1	GNRGTRYQTFVNF	331	N	1	687.423	732.893	673.593	718.336	0.979881	0.980138	0.980009	0.000181539	93
	1	GARGNRYQTFVNF	334	N	1	1771.2	1609.96	1915.2	2210.58	1.0813	1.37306	1.22718	0.206308	71
	1	GARGTRNQTFVNF	336	N	1	677.101	730.49	768.614	841.832	1.13515	1.15242	1.14379	0.0122104	78
	1	GARGTRYNTFVNF	337	N	1	458.282	571.897	916.424	885.056	1.99969	1.54758	1.77364	0.319693	54
	1	GARGTRYQNFVNF	338	N	1	2809.56	2809.02	2911.86	2986.55	1.03641	1.0632	1.04981	0.01894	89
	1	GARGTRYQTNVNF	339	N	1	1738.17	1545.08	1399.97	1339.93	0.805431	0.867225	0.836328	0.0436946	102
	1	GARGTRYQTFNNF	340	N	1	216.755	321.992	149.922	253.167	0.691665	0.786252	0.738959	0.0668831	108
	1	PARGTRYQTFVNF	330	P	2	2002.4	1780.57	3683.64	3891.16	1.67439	1.97267	1.82353	0.453067	50
	1	GPRGTRYQTFVNF	331	P	2	884.567	771.34	177.372	150.254	0.208386	0.220418	0.214402	0.0450029	174
	1	GARPTRYQTFVNF	333	P	1	611.043	461.362	1119.14	969.445	1.83152	2.10127	1.96639	0.190742	41
	1	GARGPRYQTFVNF	334	P	2	1076.55	1070.5	1313.4	1314.21	1.35167	1.30725	1.32946	0.194747	65
	1	GARGTRPQTFVNF	336	P	1	152.761	141.773	59.1241	267.575	0.387038	1.88735	1.13719	1.06088	79
	1	GARGTRYPTFVNF	337	P	2	904.178	901.098	1073.74	1126.9	1.09059	1.28117	1.18588	0.167234	73
	1	GARGTRYQPFVNF	338	P	2	1675.21	1509.04	660.923	656.588	0.409151	0.38194	0.395545	0.0834531	154
	1	GARGTRYQTPVNF	339	P	2	1406.84	1153.41	1334.52	1416.09	1.01092	1.13579	1.07335	0.200413	87
	1	GARGTRYQTFPNF	340	P	2	835.023	621.157	449.766	524.859	0.677626	0.838099	0.757863	0.19361	106
	1	QARGTRYQTFVNF	330	Q	1	3278.16	3638.03	3851.51	4054.79	1.1749	1.11456	1.14473	0.0426703	77
	1	GQRGTRYQTFVNF	331	Q	1	2832.26	2895.53	2219.27	1926.54	0.783566	0.66535	0.724458	0.083591	111
	1	GARQTRYQTFVNF	333	Q	1	968.172	740.102	1473.88	1722.77	1.52233	2.32775	1.92504	0.569516	44
	1	GARGQRYQTFVNF	334	Q	1	1304.66	1158.21	221.715	156.428	0.169941	0.13506	0.152501	0.0246646	192
	1	GARGTRQQTFVNF	336	Q	1	681.23	809.787	962.878	901.522	1.41344	1.11328	1.26336	0.212244	68
	1	GARGTRYQQFVNF	338	Q	1	3938.75	3902.35	3798.72	3830.44	0.96445	0.981571	0.973011	0.0121067	95
	1	GARGTRYQTQVNF	339	Q	1	3131.59	3219.92	3127.24	3054.47	0.998611	0.948616	0.973614	0.0353516	94
	1	GARGTRYQTFQNF	340	Q	1	1178.73	1439.35	304.067	485.752	0.257961	0.337479	0.29772	0.056228	162
	1	SARGTRYQTFVNF	330	S	3	2227.42	2306.01	612.357	522.114	0.262725	0.244985	0.253855	0.0591465	168
	1	GSRGTRYQTFVNF	331	S	3	2348.52	2128.19	1333.11	1383.16	0.485184	0.749268	0.617226	0.191706	128
	1	GARSTRYQTFVNF	333	S	2	793.736	831.413	1407.37	1404.77	1.75917	1.68332	1.72124	0.305305	56
	1	GARGSRYQTFVNF	334	S	3	2312.05	2430.96	2678.18	2488.45	1.18301	1.03597	1.10949	0.172764	82
	1	GARGTRSQTFVNF	336	S	3	1136.07	1066.9	863.634	872.02	0.733875	0.957734	0.845804	0.31049	101
	1	GARGTRYSTFVNF	337	S	3	961.979	1079.72	1105.76	1263.78	1.0469	1.22155	1.13422	0.2177	80
	1	GARGTRYQSFVNF	338	S	3	2846.03	2788.2	1542.86	1529.29	0.570206	0.551388	0.560797	0.0915499	132
	1	GARGTRYQTSVNF	339	S	2	2736.27	2637.21	2192.87	2394.8	0.86898	1.0288	0.94889	0.223189	97
	1	GARGTRYQTFSNF	340	S	3	1184.24	1199.06	733.421	657.274	0.734473	0.552699	0.643586	0.227894	123
	1	TARGTRYQTFVNF	330	T	2	1417.16	1595.54	257.612	271.692	0.105577	0.108177	0.106877	0.114597	211
	1	GTRGTRYQTFVNF	331	T	2	2060.2	1987.22	1710.38	1459.31	0.680702	0.752301	0.716502	0.184039	115
	1	GARTTRYQTFVNF	333	T	1	999.137	1018.84	1750.5	2109.73	1.75201	2.07071	1.91136	0.225357	46
	1	GARGTRTQTFVNF	336	T	2	300.36	368.849	363.191	328.294	1.40894	0.911466	1.1602	0.48793	76
	1	GARGTRYTTFVNF	337	T	2	969.204	908.307	476.16	405.479	0.356626	0.494908	0.425767	0.167554	151
	1	GARGTRYQTTVNF	339	T	2	1558.57	1489.82	1554.12	1519	1.10602	0.989975	1.048	0.152772	90
	1	GARGTRYQTFTNF	340	T	2	900.049	854.241	521.559	371.518	0.559428	0.384015	0.471721	0.123399	146
	1	VARGTRYQTFVNF	330	V	2	3991.39	4036.92	497.276	274.779	0.137617	0.0701212	0.103869	0.0546144	212
	1	GVRGTRYQTFVNF	331	V	2	5634.6	5296.05	3082.9	3350.86	0.568294	0.661578	0.614936	0.0881746	129
	1	GARVTRYQTFVNF	333	V	2	5284.69	5149.47	9204.36	8659.14	1.79319	1.81345	1.80332	0.152667	52
	1	GARGVRYQTFVNF	334	V	2	3312.22	2965.21	607.078	395.188	0.206817	0.157424	0.182121	0.116584	184
	1	GARGTRVQTFVNF	336	V	2	2147.94	2185.46	1214.16	1243.19	0.544542	0.544588	0.544565	0.14492	136
	1	GARGTRYVTFVNF	337	V	2	3011.86	3193.49	268.17	195.536	0.107255	0.0768943	0.0920747	0.0356917	215
	1	GARGTRYQVFVNF	338	V	2	7197.3	7017.75	654.588	662.763	0.0890239	0.0920534	0.0905386	0.0120804	216
	1	GARGTRYQTVVNF	339	V	2	7837.24	8090.66	8832.72	8370.98	1.15515	1.04264	1.0989	0.100474	83
	1	WARGTRYQTFVNF	330	W	1	6752.43	6411.01	3933.87	3626.67	0.582585	0.565694	0.574139	0.0119436	131
	1	GWRGTRYQTFVNF	331	W	1	3368.99	3114.19	1467.55	1416.09	0.435604	0.454721	0.445162	0.013518	150
	1	GARWTRYQTFVNF	333	W	1	12421.1	12187.6	22044.8	23283.1	1.77479	1.91039	1.84259	0.0958814	49
	1	GARGWRYQTFVNF	334	W	1	5670.72	5327.29	574.349	856.24	0.101283	0.160727	0.131005	0.0420332	202
	1	GARGTRWQTFVNF	336	W	1	5330.11	5908.8	1199.37	1123.82	0.225019	0.190193	0.207606	0.0246253	177
	1	GARGTRYWTFVNF	337	W	1	5804.9	5824.7	409.646	428.12	0.0705689	0.0735008	0.0720349	0.00207319	222
	1	GARGTRYQWFVNF	338	W	1	6607.93	7151.11	880.527	769.793	0.133253	0.107647	0.12045	0.0181065	207
	1	GARGTRYQTFWNF	340	W	1	5373.46	4664.08	1758.94	1722.77	0.327339	0.36937	0.348354	0.0297203	158
	1	YARGTRYQTFVNF	330	Y	1	1145.7	1331.22	384.307	300.507	0.335433	0.225738	0.280585	0.0775658	164
	1	GYRGTRYQTFVNF	331	Y	1	656.458	615.149	164.703	80.2725	0.250896	0.130493	0.190695	0.0851383	182
	1	GARYTRYQTFVNF	333	Y	1	113.538	132.161	261.835	207.885	2.30614	1.57297	1.93956	0.518431	42
	1	GARGYRYQTFVNF	334	Y	1	809.218	1006.83	154.145	166.72	0.190486	0.165589	0.178038	0.0176048	185
	1	GARGTRYYTFVNF	337	Y	1	268.363	451.75	2.11158	82.3308	0.00786835	0.182248	0.0950584	0.123305	213
	1	GARGTRYQYFVNF	338	Y	1	2656.8	2722.52	244.943	214.06	0.0921948	0.0786258	0.0854103	0.00959473	218
	1	GARGTRYQTYVNF	339	Y	1	2291.41	2746.55	2903.42	2021.22	1.26709	0.735914	1.0015	0.375597	92
	1	GARGTRYQTFYNF	340	Y	1	879.406	831.413	354.745	296.391	0.403391	0.35649	0.379941	0.0331639	156
WT (+2)
	1	GARGTRYQTFVNF	332		3	3780.48	3684.49	2603.57	2314.18	0.680089	0.621783	0.650936	0.104194	122
	0	GARGTRYQTFVNF	NA		1	58963.5	61380.4	38872	37020	0.659255	0.603125	0.63119	0.0396898	124
	1	GARGTRYQTFVNF	335		3	2868.05	2987.64	1896.19	1812.65	0.644056	0.614785	0.629421	0.103225	125
	1	GARGTRYQTFVNF	333		1	5753.3	6175.52	3625.58	3791.33	0.630174	0.613929	0.622051	0.0114868	127
	1	GARGTRYQTFVNF	330		1	6430.4	6149.09	2880.19	4326.48	0.447902	0.703597	0.57575	0.180803	130
	1	GARGTRYQTFVNF	339		1	3024.25	3157.45	1775.84	1677.49	0.587199	0.53128	0.55924	0.0395404	133
	1	GARGTRYQTFVNF	331		2	4279.36	4225.55	2360.74	2195.14	0.580529	0.510928	0.545729	0.0908242	135
	1	GARGTRYQTFVNF	334		2	2656.8	2607.18	1406.31	1344.05	0.560464	0.525165	0.542814	0.076193	137
	1	GARGTRYQTFVNF	340		1	3125.4	2929.17	1699.82	1481.95	0.543872	0.50593	0.524901	0.0268293	141
	1	GARGTRYQTFVNF	338		2	4312.39	4125.83	2331.18	2061.36	0.524694	0.507109	0.515901	0.0473711	142
STOP
	1	GARGT*YQTFVNF	335	*	1	1659.72	1578.72	458.212	434.295	0.276077	0.275092	0.275585	0.000696366	165
	1	*ARGTRYQTFVNF	330	*	1	3860.3	3549.12	950.209	1035.31	0.246149	0.291708	0.268929	0.0322155	166
	1	GARG*RYQTFVNF	334	*	1	1059	1064.5	306.178	251.109	0.28912	0.235894	0.262507	0.0376359	167
	1	GAR*TRYQTFVNF	333	*	1	714.259	504.615	116.137	131.729	0.162597	0.261049	0.211823	0.0696159	175
	1	GARGTR*QTFVNF	336	*	1	1959.05	1857.46	380.084	403.421	0.194014	0.217189	0.205602	0.0163873	179
	1	GA*GTRYQTFVNF	332	*	1	1403.75	1646.01	247.054	267.575	0.175996	0.16256	0.169278	0.00950082	189
	1	GARGTRYQT*VNF	339	*	1	3451.56	3224.73	530.005	477.519	0.153555	0.14808	0.150818	0.00387136	193
	1	GARGTRYQTF*NF	340	*	1	1783.58	1713.29	234.385	216.118	0.131412	0.126142	0.128777	0.00372636	204
	1	GARGTRYQ*FVNF	338	*	1	3812.82	3489.05	396.976	496.043	0.104116	0.142171	0.123144	0.0269091	205
	1	G*RGTRYQTFVNF	331	*	1	1176.67	1086.12	217.492	61.7481	0.184837	0.0568518	0.120844	0.0904993	206
	1	GARGTRY*TFVNF	337	*	1	2179.94	2585.55	209.046	181.128	0.0958955	0.0700538	0.0829747	0.0182728	219
missense (+1)
	1	GARDTRYQTFVNF	333	D	1	633.75	699.252	2546.56	2521.38	4.01824	3.60583	3.81203	0.291621	4
	1	GARGTRYDTFVNF	337	D	1	862.891	970.783	2683.81	3093.58	3.11026	3.18669	3.14847	0.0540434	9
	1	DARGTRYQTFVNF	330	D	1	2227.42	2523.07	6385.4	5540.86	2.86673	2.19608	2.5314	0.474226	27
	1	GDRGTRYQTFVNF	331	D	1	3705.48	3412.16	8931.97	8115.76	2.41048	2.37848	2.39448	0.0226228	30
	1	GARGDRYQTFVNF	334	D	1	3515.56	2962.81	7010.43	6613.22	1.99412	2.23208	2.1131	0.168264	40
	1	GARGTRYQDFVNF	338	D	1	3575.42	3618.81	5735.04	5777.56	1.60402	1.59654	1.60028	0.0052887	59
	1	GARGTRDQTFVNF	336	D	1	3527.94	3960.02	3870.52	4345.01	1.0971	1.09722	1.09716	8.08e-05	84
	1	GARGTRYQTDVNF	339	D	1	5548.93	4738.57	4016.22	3414.67	0.723783	0.720611	0.722197	0.00224253	112
	1	GARGTRYQTFDNF	340	D	1	718.388	802.578	128.806	76.156	0.179299	0.0948892	0.137094	0.0596866	198
	1	GARETRYQTFVNF	333	E	1	6744.18	6026.54	19230.1	19329.2	2.85137	3.20735	3.02936	0.251715	12
	1	EARGTRYQTFVNF	330	E	1	6878.36	6970.89	15653.1	16077.1	2.2757	2.30632	2.29101	0.0216516	34
	1	GERGTRYQTFVNF	331	E	1	6124.88	5928.02	12990.4	13913.9	2.12093	2.34714	2.23403	0.159957	36
	1	GARGTRYQEFVNF	338	E	1	4083.25	4154.66	6708.48	7977.85	1.64293	1.92022	1.78157	0.196075	53
	1	GARGTRYETFVNF	337	E	1	4169.95	4618.43	6727.48	6837.57	1.61332	1.4805	1.54691	0.0939215	61
	1	GARGTREQTFVNF	336	E	1	3841.72	3731.75	4400.52	5246.53	1.14546	1.40592	1.27569	0.184175	67
	1	GARGERYQTFVNF	334	E	1	2124.2	2513.46	2690.15	2788.96	1.26643	1.10961	1.18802	0.11089	72
	1	GARGTRYQTEVNF	339	E	1	8354.36	7665.34	6780.27	6582.35	0.811585	0.858716	0.83515	0.0333263	103
	1	GARGTRYQTFENF	340	E	1	1777.39	1999.24	483.551	590.723	0.272057	0.295475	0.283766	0.016559	163
	1	GAAGTRYQTFVNF	332	A	2	3281.26	3343.67	8916.13	9293.09	2.65881	2.7573	2.70806	0.18997	22
	1	GACGTRYQTFVNF	332	C	1	3982.1	3678.88	11700.2	11168.2	2.93821	3.03575	2.98698	0.0689719	13
	1	GAFGTRYQTFVNF	332	F	1	1248.92	1117.36	2816.84	2636.64	2.25542	2.35971	2.30756	0.0737409	33
	1	GAGGTRYQTFVNF	332	G	2	5441.58	5083.39	12475.2	12441.2	2.31032	2.46901	2.38966	0.161709	31
	1	GAHGTRYQTFVNF	332	H	1	2243.93	2121.79	5561.89	5011.89	2.47864	2.36211	2.42037	0.0823991	29
	1	GAIGTRYQTFVNF	332	I	1	1207.63	965.977	3040.67	2784.84	2.51787	2.88292	2.7004	0.258132	24
	1	GALGTRYQTFVNF	332	L	3	2215.03	1971.2	3766.35	3828.38	1.71893	1.89464	1.80678	0.195311	51
	1	GAMGTRYQTFVNF	332	M	1	2528.81	2679.26	7088.56	7819.37	2.80312	2.91848	2.8608	0.0815661	18
	1	GANGTRYQTFVNF	332	N	1	1023.91	1076.51	1955.32	2078.85	1.90966	1.9311	1.92038	0.0151603	45
	1	GAPGTRYQTFVNF	332	P	2	2580.42	2527.88	9561.21	9859.11	3.64908	3.82462	3.73685	0.318781	5
	1	GAQGTRYQTFVNF	332	Q	1	2120.07	2071.32	6414.97	5761.1	3.02583	2.78136	2.90359	0.172865	14
	1	GASGTRYQTFVNF	332	S	3	2443.48	2297.2	6104.57	6049.25	2.50391	2.46699	2.48545	0.398037	28
	1	GATGTRYQTFVNF	332	T	2	1494.58	1483.81	4288.61	4213.28	2.96189	2.73115	2.84652	0.339351	19
	1	GAVGTRYQTFVNF	332	V	2	3421.63	3632.03	9866.34	10567.2	2.82668	2.93877	2.88272	0.242011	16
	1	GAWGTRYQTFVNF	332	W	1	5606.73	5298.46	14525.5	14895.7	2.59073	2.81133	2.70103	0.155985	23
	1	GAYGTRYQTFVNF	332	Y	1	1075.52	997.215	3355.29	4065.08	3.1197	4.07644	3.59807	0.676513	6
	1	GARGTAYQTFVNF	335	A	2	2127.3	2154.22	6230.2	6164.52	2.95668	2.79726	2.87697	0.345587	17
	1	GARGTCYQTFVNF	335	C	1	2698.08	2806.62	7088.56	7607.36	2.62726	2.71051	2.66888	0.0588668	25
	1	GARGTFYQTFVNF	335	F	1	1715.46	1749.33	2620.47	2823.95	1.52756	1.6143	1.57093	0.061336	60
	1	GARGTGYQTFVNF	335	G	2	4361.94	3973.24	13080.2	12910.5	2.99945	3.25477	3.12711	0.150904	10
	1	GARGTHYQTFVNF	335	H	1	945.464	1112.56	2968.88	3610.2	3.14012	3.24497	3.19254	0.0741347	7
	1	GARGTIYQTFVNF	335	I	1	883.534	1064.5	1883.53	1706.31	2.13181	1.60292	1.86736	0.373979	48
	1	GARGTLYQTFVNF	335	L	3	2114.56	2299.6	5316.24	5586.83	2.67512	2.54846	2.61179	0.433684	26
	1	GARGTMYQTFVNF	335	M	1	3530.01	3181.48	7907.85	6660.56	2.24018	2.09354	2.16686	0.103686	38
	1	GARGTNYQTFVNF	335	N	1	1145.7	934.739	3118.8	3394.09	2.72216	3.63105	3.17661	0.642681	8
	1	GARGTPYQTFVNF	335	P	2	1386.2	1251.93	4028.89	3873.66	2.68209	3.09145	2.88677	0.44474	15
	1	GARGTQYQTFVNF	335	Q	1	3094.43	3157.45	7529.88	6432.09	2.43336	2.03712	2.23524	0.280186	35
	1	GARGTSYQTFVNF	335	S	3	1956.3	2058.51	5612.57	5409.13	2.87101	2.68348	2.77725	0.25269	21
	1	GARGTTYQTFVNF	335	T	2	1085.84	1433.35	3476.71	3307.64	3.45829	2.1981	2.8282	0.82254	20
	1	GARGTVYQTFVNF	335	V	2	2970.57	2995.25	6605.01	6942.54	2.19243	2.24209	2.21726	0.201416	37
	1	GARGTWYQTFVNF	335	W	1	4679.84	4378.13	9791.38	11742.4	2.09224	2.68206	2.38715	0.417064	32
	1	GARGTYYQTFVNF	335	Y	1	1296.4	1523.46	2719.71	2157.07	2.09789	1.4159	1.7569	0.482239	55
missense (+0)
	1	GADGTRYQTFVNF	332	D	1	2528.81	2515.87	7392.63	8152.81	2.92336	3.24056	3.08196	0.224289	11
	1	GARGTDYQTFVNF	335	D	1	2504.04	2455.79	10405.8	11302	4.15563	4.60216	4.3789	0.315748	1
	1	GAEGTRYQTFVNF	332	E	1	4231.88	4637.65	18176.4	19261.3	4.29512	4.15324	4.22418	0.100323	2
	1	GARGTEYQTFVNF	335	E	1	4000.68	3553.93	13856.2	14836	3.46345	4.17454	3.81899	0.502811	3
missense (+3)
	1	KARGTRYQTFVNF	330	K	1	3612.58	4008.08	709.489	714.22	0.196394	0.178195	0.187294	0.0128688	183
	1	GKRGTRYQTFVNF	331	K	1	3077.92	2994.05	665.146	547.5	0.216103	0.182863	0.199483	0.0235041	181
	1	GARKTRYQTFVNF	333	K	1	608.978	744.908	572.237	382.838	0.939667	0.51394	0.726804	0.301034	110
	1	GARGKRYQTFVNF	334	K	1	1467.74	1326.42	367.414	100.855	0.250326	0.0760359	0.163181	0.123242	190
	1	GARGTRKQTFVNF	336	K	1	858.762	990.006	1252.16	1835.98	1.4581	1.85451	1.65631	0.280302	58
	1	GARGTRYKTFVNF	337	K	1	2826.07	3018.08	574.349	619.539	0.203232	0.205276	0.204254	0.00144531	180
	1	GARGTRYQKFVNF	338	K	1	3876.82	4169.08	979.771	798.609	0.252726	0.191555	0.22214	0.0432541	172
	1	GARGTRYQTKVNF	339	K	1	3645.61	3340.07	838.296	913.872	0.229946	0.273609	0.251778	0.0308738	169
	1	GARGTRYQTFKNF	340	K	1	1317.04	1340.83	185.819	279.925	0.141088	0.208769	0.174928	0.047858	187
	1	RARGTRYQTFVNF	330	R	3	6116.62	5987.29	1157.14	940.629	0.194111	0.160564	0.177337	0.048397	186
	1	GRRGTRYQTFVNF	331	R	3	6692.57	6834.73	874.896	839.088	0.123135	0.113274	0.118205	0.04267	208
	1	GARRTRYQTFVNF	333	R	3	5797.33	5775.84	2650.03	2336.14	0.462403	0.375679	0.419041	0.0664074	152
	1	GARGRRYQTFVNF	334	R	3	3311.19	3392.13	420.907	536.522	0.127997	0.158171	0.143084	0.0201274	195
	1	GARGTRRQTFVNF	336	R	3	2085.66	2367.68	1490.07	1554.68	0.729099	0.657766	0.693432	0.0809394	118
	1	GARGTRYRTFVNF	337	R	3	3726.12	3931.19	511.001	528.975	0.13782	0.136527	0.137173	0.0269909	197
	1	GARGTRYQRFVNF	338	R	3	8533.95	9156.76	1278.91	1162.24	0.162381	0.159128	0.160754	0.0510115	191
	1	GARGTRYQTFRNF	340	R	3	3138.47	3110.19	470.178	439.784	0.141169	0.125829	0.133499	0.049642	200
