# Supplementary material for: Mutational resilience of antiviral restriction favors primate TRIM5α in host-virus evolutionary arms races
Source: eLife. 2020 Sep 15;9:e59988. doi: 10.7554/eLife.59988 (PMC7492085; doi:10.7554/eLife.59988)
Supplement: Figure 2—source data 3. [file elife-59988-fig2-data3.xlsx]

## Sheet: Summary
	HIV-1 Fold Restriction
Human TRIM5 variant	2019-05-24	2019-05-25	2019-06-07	2019-07-09	2019-07-12	2019-07-13	2019-08-30	2019-09-13	2019-12-27	2019-12-28	2019-12-31
WT	2.65925			2.07893	1.73967	1.34682	2.44163	3.75254	1.575	2.82169	3.1
G330E	33.6029	30.4578		9.95852
A331E				8.95244	7.88735	7.76871
R332E				24.2836	15.2604	15.6094
R332P	28.1466	68.4343		20.3312			17.6851	31.7315
G333Y				7.35443	11.4966	9.30356
G333D	22.8198	22.5936	15.6431	9.20683
T334D	12.2541	11.4109	15.1642	10.2855
R335A									29.0366	60.8237	71.88
R335E	29.2873	24.6115		21.2195
Y336E	3.82417	8.81529	5.88366	7.6229
Q337D	14.1206	12.2532		12.4218
Q337N								13.521	3.44053	7.13	7.28
T338E		12.0411	8.96157	8.15156
F339E					3.81553	2.93318	4.7481
V340E	0.718819	0.480008		1.11199	0.752375	0.616609
V340H								3.66678	0.989395	1.45502	3.2
V340stop				1.27828	1.27845	1.16375	0.972384		0.733243	0.82453	1.57

## Sheet: 5-24-19
Raw data
Viral Dose (ul)	Empty		Human WT		G330E		R332P		G333D		T334D		R335E		Y336E		Q337D		V340E
5	95.9*	96.7*	98.2*	98.4*	47.5	41.9	53.1*	54.1*	57.5*	60.2*	76.6*	76*	52.5*	54.4*	87.7*	87.4*	68.5*	68*	82.1*	81.9*
2.22222	92.7*	93.6*	92.8*	93.4*	26.2	27.9	29.6	31.5	37.7	35.9	61.1*	57.5*	34.1	31.4	70.9*	74.1*	46.1	49	86.6*	79.1*
0.98765	78*	88*	76.4*	77.1*	14.4	11.5	14.6	15	17.6	17.5	27.9	33.5	14.7	15.7	49	49.7	28.1	25.3	87*	81.5*
0.43896	60.3*	70*	51.1*	50.5*	6.54	6.37	6.71	6.58	8.45	8.03	10.4	17.7	6.36	6.37	23.6	29.2	13	16.3	79.9*	74.8*
0.19509	52.5*	46.9	29.5	27.9	3.21	2.53	2.95	3.75	4.29	3.56	6.13	5.58	3.54	2.53	9.47	19.6	5.58	6.45	67.8*	62.9*
0.08671	27.7	24.5	14.2	13.4	1.78	1.46	2	1.99	2.28	2.19	3.88	4.57			10.4	11.8	3.26	3.36	48.2	47.2
0.03854	11.19	23.7	6.15	8.17	0.63*	0.57*	0.91	0.75	1.26	1.02	2.49	2.27			5.86	6.55			19.7	23.8
0.01713	5.36	10.9	3.2	2.81	0.45*	0.34*	0.37*	0.55*	0.56	0.4	1.05	1.59							10.6	10.5
Log-transformed data
Viral Dose (ul)	Empty		Human WT		G330E		R332P		G333D		T334D		R335E		Y336E		Q337D		V340E
0.69897					1.67669	1.62221
0.346787					1.4183	1.4456	1.47129	1.49831	1.57634	1.55509			1.53275	1.49693			1.6637	1.6902
-0.00539693					1.15836	1.0607	1.16435	1.17609	1.24551	1.24304	1.4456	1.52504	1.16732	1.1959	1.6902	1.69636	1.44871	1.40312
-0.357575					0.815578	0.804139	0.826723	0.818226	0.926857	0.904716	1.01703	1.24797	0.803457	0.804139	1.37291	1.46538	1.11394	1.21219
-0.709765		1.67117	1.46982	1.4456	0.506505	0.403121	0.469822	0.574031	0.632457	0.55145	0.78746	0.746634	0.549003	0.403121	0.97635	1.29226	0.746634	0.80956
-1.06193	1.44248	1.38917	1.15229	1.1271	0.25042	0.164353	0.30103	0.298853	0.357935	0.340444	0.588832	0.659916			1.01703	1.07188	0.513218	0.526339	1.68305	1.67394
-1.41409	1.04883	1.37475	0.788875	0.912222			-0.0409586	-0.124939	0.100371	0.00860017	0.396199	0.356026			0.767898	0.816241			1.29447	1.37658
-1.76624	0.729165	1.03743	0.50515	0.448706					-0.251812	-0.39794	0.0211893	0.201397							1.02531	1.02119
Linear regression
	Empty	Human WT	G330E	R332P	G333D	T334D	R335E	Y336E	Q337D	V340E
Best-fit values
Slope	0.7353	0.9176	0.8471	0.8721	0.874	0.753	0.9921	0.6182	0.8411	0.9303
Y-intercept	2.208	2.117	1.098	1.168	1.248	1.417	1.174	1.655	1.414	2.661
log(x) for log(y) = 1	-1.64287	-1.21731	-0.115689	-0.192638	-0.283753	-0.553785	-0.175386	-1.05953	-0.492213	-1.78545
x when y = 10	0.022758	0.0606309	0.766145	0.641744	0.520292	0.279393	0.667751	0.0871911	0.321949	0.0163891
fold inhibition	0.998156	2.65925	33.6029	28.1466	22.8198	12.2541	29.2873	3.82417	14.1206	0.718819

## Sheet: 5-25-19
Raw data
Viral Dose (ul)	Empty		G330E		R332P		G333D		T334D		R335E		Y336E		Q337D		T338E		V340E
5	94.8*	93.9*	40.6	47.9	26.4	25.5	47.5*	54.4*	56.6*	62.7*	43.3*	41.2*	75.6*	83.6*	66*	67.4*	48.6*	68.1*	79.3*	78.2*
2.22222	96.9*	96.3*	25.7	23	10.5	9.53	26.6	25.7	43.3	48.4	28.3	27	61.8*	65.2*	42	42.8	39.4*	23.8*	74.1*	73.3*
0.98765	89.6*	79.32*	11	9.83	4.63	4.76	14.5	11.4	20.6	27.1	14.3	12.4	35.9	42.3	23.9	22.4	23.5	20.9	77*	72.6*
0.43896	79.3*	72.5*	4.64	4.84	2.22	1.64	7.35	7.14	10.8	13	6.74	5.45	13.8	19	12.2	12.4	15.3	13.7	73.1*	68.7*
0.19509	49.6	49.3	2.74	2.21	0.91	0.9	3.63	3.12	5.62	7.09	2.68	2.7	7.72	6.83	7.44	5.2	8.75	5.83	65.1*	61.2*
0.08671	23.8	26	1.43	0.99	0.48*	0.44*	1.92	2.11			1.36	1.24			2.78	2.98	1.11	2.57	41.9	39.6
0.03854	11.9	15.7	0.51*	0.47*	0.33*	0.26*	1.17*	0*			0.61	0.46			1.49	1.15			22.2	23.7
0.01713	4.29	7.36	1.58*	1.76*	0.39*	0.45*	3.49*	4.35*			0.57*	0.65*			0.68	0.78			11.3	10.8
Log-transformed data
Viral Dose (ul)	Empty		G330E		R332P		G333D		T334D		R335E		Y336E		Q337D		T338E		V340E
0.69897			1.60853	1.68034	1.4216	1.40654
0.346787			1.40993	1.36173	1.02119	0.979093	1.42488	1.40993	1.63649	1.68485	1.45179	1.43136			1.62325	1.63144
-0.00539693			1.04139	0.992554	0.665581	0.677607	1.16137	1.0569	1.31387	1.43297	1.15534	1.09342	1.55509	1.62634	1.3784	1.35025	1.37107	1.32015
-0.357575			0.666518	0.684845	0.346353	0.214844	0.866287	0.853698	1.03342	1.11394	0.82866	0.736397	1.13988	1.27875	1.08636	1.09342	1.18469	1.13672
-0.709765	1.69548	1.69285	0.437751	0.344392	-0.0409586	-0.0457575	0.559907	0.494155	0.749736	0.850646	0.428135	0.431364	0.887617	0.834421	0.871573	0.716003	0.942008	0.765669
-1.06193	1.37658	1.41497	0.155336	-0.00436481			0.283301	0.324282			0.133539	0.0934217			0.444045	0.474216	0.045323	0.409933	1.62221	1.5977
-1.41409	1.07555	1.1959									-0.21467	-0.337242			0.173186	0.0606978			1.34635	1.37475
-1.76624	0.632457	0.866878													-0.167491	-0.107905			1.05308	1.03342
Linear regression
	Empty	G330E	R332P	G333D	T334D	R335E	Y336E	Q337D	T338E	V340E
Best-fit values
Slope	0.8784	0.9062	1.032	0.7977	0.8181	0.9714	1.036	0.8539	1.039	0.8046
Y-intercept	2.331	1.029	0.6702	1.129	1.375	1.121	1.591	1.365	1.452	2.476
log(x) for log(y) = 1	-1.51526	-0.0320018	0.319574	-0.161715	-0.458379	-0.124562	-0.570463	-0.427451	-0.435034	-1.83445
x when y = 10	0.0305313	0.928963	2.08725	0.689104	0.348033	0.75065	0.268866	0.373723	0.367254	0.0146402
fold inhibition	1.00103	30.4578	68.4343	22.5936	11.4109	24.6115	8.81529	12.2532	12.0411	0.480008

## Sheet: 6-7-19
Raw data
Viral Dose (ul)	Empty		G333D		T334D		Y336E		T338E
2.22222	25.6	26.4	1.62	2.03	1.43	1.29	3.29	4.77	2.83	2.74
0.98765	13	11.1	0.65	1.02	0.52	0.38	2.52	1.42	0.8	0.82
0.43896	3.49	4.22	0.29	0.43	0.18	0.27	1.33	0.31	0.48	0.51
0.19509	1.58	2.07	0.15	0.25	0.2*	0.23*	0.66	0.19	0.38*	0.42*
0.08671	0.35*	1.19*	0.28*	0.2*	0.17*	0.16*	0.15*	0.18*	0.33*	0.38*
0.03854	0.45*	1.84*	0.13*	0.18*	0.11*	0.14*	0.17*	0.18*	0.34*	0.38*
Log-transformed data
Viral Dose (ul)	Empty		G333D		T334D		Y336E		T338E
0.346787	1.40824	1.4216	0.209515	0.307496	0.155336	0.11059	0.517196	0.678518	0.451786	0.437751
-0.00539693	1.11394	1.04532	-0.187087	0.00860017	-0.283997	-0.420216	0.401401	0.152288	-0.09691	-0.0861861
-0.357575	0.542825	0.625312	-0.537602	-0.366532	-0.744727	-0.568636	0.123852	-0.508638	-0.318759	-0.29243
-0.709765	0.198657	0.31597	-0.823909	-0.60206			-0.180456	-0.721246
Linear regression
	Empty	G333D	T334D	Y336E	T338E
Best-fit values
Slope	1.127	0.9306	1.121	1.027	1.065
Y-intercept	1.038	-0.08006	-0.2859	0.2442	0.02162
log(x) for log(y) = 1	-0.0337178	1.16061	1.1471	0.73593	0.918667
x when y = 10	0.925299	14.4746	14.0314	5.44415	8.29214
fold inhibition	0.999999	15.6431	15.1642	5.88366	8.96157

## Sheet: 7-9-19
Raw data
Viral dose (uL)	Empty		Human WT		V340 Stop		G330E		A331E		R332P		R332E		G333Y		G333D		T334E		R335E		Y336E		Q337D		T338E		V340E
12.5		66.1*	49.7*	51.9*	74.1*	76.7*	9.13	8.61	8.94*	0.63*	4.92	3.48	2.9	4.36	14.6	12.9	0.9*	2.38*	8.28	8.13	3.9	3.71	12.2	11.3	6.59	7.04	11.1	10.28	71.2*	13.1*
5	38.8	38.6	21.7	22.4	37.1	37.7	2.41	2.65	3.37	2.71	1.81	1.54	1.71	1.55	3.54	3.5	2.73	2.98	3.35	3.08	1.36	1.38	3.55	4.61	2.17	2.08	3.76	3.46	41.7	35.5
2	17.01	18.58	5.93	5.52	11.8	12	0.79	0.8	1.05	1.01	0.54	0.66	0.61	0.54	1.1	1.07	0.87	0.87	1.02	1.38	0.58	0.41	1.4	1.3	0.72	0.72	0.69	0.94	14.5	17.8
0.8	4.78	4.57	1.77	1.57	3.8	3.61	0.28*	0.33*	0.25	0.34	0.18*	0.16*	0.18*	0.28*	0.38	0.27	0.22	0.29	0.32	0.45	0.19*	0.16*	0.43	0.34	0.21*	0.23*	0.22*	0.3*	3.69	5.48
0.32	1.72	2.13	0.53	0.42	0.98	1.09	0.19*	0.13*	0.13*	0.18*	0.016*	0.15*	0.13*	0.12*	0.23*	0.18*	0.083*	0.039*	0.18*	0.042*	0.041*	0.081*	0.12*	0.072*	0.045*	0.056*	0.054*	0.068*	1.12	1.44
0.128	0.7	0.87	0.14*	0.19*	0.31	0.28	0.1*	0.028*	0*	0.014*	0.028*	0.1*	0.015*	0.059*	0.055*	0.081*	0.057*	0.052*	0.1*	0.056*	0.013*	0.04*	0.075*	0.14*	0.016*	0.065*	0.03*	0*	0.4	0.59
0.0512	0.1*	0.11*	0.11*	0.1*	0.13*	0.026*	0.029*	0.066*	0.052*	0.043*	0.029*	0*	0.015*	0.045*	0*	0.05*	0.042*	0*	0.059*	0.031*	0.059*	0*	0.059*	0.016*	0*	0.014*	0.013*	0.031*	0.14*	0.21*
0.02048	0.19*	0.061*	0*	0*	0.065*	0.039*	0.016*	0.014*	0.028*	0.15*	0*	0.034*	0.055*	0.036*	0.03*	0.063*	0.031*	0.04*	0.028*	0.055*	0*	0.028*	0*	0.017*	0*	0*	0.028*	0.032*	0.045*	0.13*
Log-transformed data
Viral dose (uL)	Empty		Human WT		V340 Stop		G330E		A331E		R332P		R332E		G333Y		G333D		T334E		R335E		Y336E		Q337D		T338E		V340E
1.09691							0.960471	0.935003			0.691965	0.541579	0.462398	0.639486	1.16435	1.11059			0.91803	0.910091	0.591065	0.569374	1.08636	1.05308	0.818885	0.847573	1.04532	1.01199
0.69897	1.58883	1.58659	1.33646	1.35025	1.56937	1.57634	0.382017	0.423246	0.52763	0.432969	0.257679	0.187521	0.232996	0.190332	0.549003	0.544068	0.436163	0.474216	0.525045	0.488551	0.133539	0.139879	0.550228	0.663701	0.33646	0.318063	0.575188	0.539076	1.62014	1.55023
0.30103	1.2307	1.26905	0.773055	0.741939	1.07188	1.07918	-0.102373	-0.09691	0.0211893	0.00432137	-0.267606	-0.180456	-0.21467	-0.267606	0.0413927	0.0293838	-0.0604807	-0.0604807	0.00860017	0.139879	-0.236572	-0.387216	0.146128	0.113943	-0.142668	-0.142668	-0.161151	-0.0268721	1.16137	1.25042
-0.09691	0.679428	0.659916	0.247973	0.1959	0.579784	0.557507			-0.60206	-0.468521					-0.420216	-0.568636	-0.657577	-0.537602	-0.49485	-0.346787			-0.366532	-0.468521					0.567026	0.738781
-0.49485	0.235528	0.32838	-0.275724	-0.376751	-0.00877392	0.0374265																							0.049218	0.158362
-0.89279	-0.154902	-0.0604807			-0.508638	-0.552842																							-0.39794	-0.229148
Linear regression
	Empty	Human WT	V340 Stop	G330E	A331E	R332P	R332E	G333Y	G333D	T334E	R335E	Y336E	Q337D	T338E	V340E
Best-fit values
Slope	1.095	1.393	1.324	1.316	1.276	1.056	0.9952	1.359	1.323	1.115	1.121	1.241	1.226	1.411	1.231
Y-intercept	0.8425	0.3569	0.6684	-0.5029	-0.3982	-0.5333	-0.5218	-0.3731	-0.4658	-0.289	-0.6485	-0.2732	-0.5178	-0.4887	0.7662
log(x) for log(y) = 1	0.143836	0.461665	0.250453	1.14202	1.09577	1.45199	1.52914	1.01038	1.10794	1.15605	1.47056	1.02595	1.23801	1.05507	0.189927
x when y = 10	1.39263	2.89511	1.78014	13.8682	12.4672	28.3132	33.8174	10.2418	12.8214	14.3237	29.5503	10.6157	17.2986	11.3519	1.54856
fold inhibition	1.00002	2.07893	1.27828	9.95852	8.95244	20.3312	24.2836	7.35443	9.20683	10.2855	21.2195	7.6229	12.4218	8.15156	1.11199

## Sheet: 7-12-19
Raw data
Viral dose (uL)	A331E		R332E		G333Y		F339E		V340E		Empty		Human WT		V340 Stop
12.5	20.6	18	10.3	8.91	15.2	14.5	38.6	36.8	91.6*	91.5*	91.3*	93.8*	79.1*	78.1*	87.7*	86.7*
5	8.53	6.3	2.46	2.62	3.68	3.59	17.1	16.3	72.5*	74*	64.5*	66.6*	48.3	47.2	55.5*	58.3*
2	3.17	1.93	0.86	0.78	1.32	1.33	6.66	5.69	38.9	37.9	27.6	31.4	18.9	17	23.5	24
0.8	1.05	0.78	0.21*	0.31*	0.58	0.38	2.05	2.31	14.2	14.8	8.68	10.1	4.52	3.59	5.66	6.49
0.32	0.38*	0.21*	0.14*	0.065*	0.13*	0.11*	0.86	0.82	5.2	4.33	2.63	2.59	1.25	0.93	1.6	1.87
0.128	0.19*	0.062*	0.038*	0.012*	0.049*	0.049*	0.33*	0.27*	1.07	0.92	0.96	0.74	0.39	0.26	0.52	0.75
0.0512	0.051*	0.077*	0.013*	0.067*	0.025*	0.025*	0.11*	0.16*	0.4*	0.33*	0.26*	0.35*	0.14*	0.18*	0.35*	0.36*
0.0248	0.038*	0.013*	0.065*	0.013*	0.037*	0*	0.053*	0.052*	0.1*	0.1*	0.18*	0.12*	0.077*	0.075*	0.1*	0.1*
Log-transformed data
Viral dose (uL)	A331E		R332E		G333Y		F339E		V340E		Empty		Human WT		V340 Stop
1.09691	1.31387	1.25527	1.01284	0.949878	1.18184	1.16137	1.58659	1.56585
0.69897	0.930949	0.799341	0.390935	0.418301	0.565848	0.555094	1.233	1.21219					1.68395	1.67394
0.30103	0.501059	0.285557	-0.0655015	-0.107905	0.120574	0.123852	0.823474	0.755112	1.58995	1.57864	1.44091	1.49693	1.27646	1.23045	1.37107	1.38021
-0.09691	0.0211893	-0.107905			-0.236572	-0.420216	0.311754	0.363612	1.15229	1.17026	0.93852	1.00432	0.655138	0.555094	0.752816	0.812245
-0.49485							-0.0655015	-0.0861861	0.716003	0.636488	0.419956	0.4133	0.09691	-0.0315171	0.20412	0.271842
-0.89279									0.0293838	-0.0362122	-0.0177288	-0.130768	-0.408935	-0.585027	-0.283997	-0.124939
Linear regression
	Empty	Human WT	V340 Stop	A331E	R332E	G333Y	F339E	V340E
Best-fit values
Slope	1.303	1.4	1.328	1.12	1.342	1.241	1.053	1.319
Y-intercept	1.081	0.7504	0.9409	0.06508	-0.5049	-0.239	0.4531	1.245
log(x) for log(y) = 1	-0.0621642	0.178286	0.044503	0.83475	1.12139	0.998388	0.519373	-0.185747
x when y = 10	0.866634	1.5076	1.10791	6.83518	13.2247	9.96296	3.30654	0.652008
fold inhibition	1.00004	1.73967	1.27845	7.88735	15.2604	11.4966	3.81553	0.752375

## Sheet: 7-13-19
Raw data
Viral dose (uL)	A331E		R332E		G333Y		F339E		V340E		Empty		Human WT		V340 Stop
12.5	5.1	4.74	2.03	1.88	3.79	3.64	16.2	16.3	77.8*	81.1*	66.8*	75.3*	56.6*	50.5*	55.6*	62.3*
5	1.21	1.41	0.55	0.65	0.8	0.93	6.17	5.39	41.7	48.3	26.7	29.2	16.9	15.6	19.9	22.5
2	0.5	0.31	0.2	0.15	0.24	0.28	1.76	1.76	15.2	14.8	4.75	7.9	3.93	3.69	4.62	4.68
0.8	0.1*	0.17*	0.04*	0.11*	0.19*	0.16*	0.53	0.24	3.9	3.36	0.96	1.35	0.98	1.05	1.09	0.91
0.32	0.17*	0.08*	0.087*	0.013*	0.12*	0.11*	0.17*	0.19*	0.56	0.95	0.24*	0.4*	0.38*	0.43*	0.45*	0.42*
0.128	0.13*	0.063*	0.063*	0.026*	0.072*	0.072*	0.18*	0.14*	0.34*	0.59*	0.16*	0.26*	0.36*	0.23*	0.21*	0.28*
0.0512	0.063*	0.05*	0.075*	0.051*	0.073*	0.086*	0.17*	0.073*	0.24*	0.26*	0.1*	0.083*	0.29*	0.36*	0.16*	0.13*
0.0248	0.13*	0.078*	0.013*	0.063*	0.049*	0.12*	0.24*	0.075*	0.25*	0.19*	0.07*	0.056*	0.36*	0.32*	0.13*	0.087*
Log-transformed data
Viral dose (uL)	A331E		R332E		G333Y		F339E		V340E		Empty		Human WT		V340 Stop
1.09691	0.70757	0.675778	0.307496	0.274158	0.578639	0.561101	1.20952	1.21219
0.69897	0.0827854	0.149219	-0.259637	-0.187087	-0.09691	-0.0315171	0.790285	0.731589	1.62014	1.68395	1.42651	1.46538	1.22789	1.19312	1.29885	1.35218
0.30103	-0.30103	-0.508638	-0.69897	-0.823909	-0.619789	-0.552842	0.245513	0.245513	1.18184	1.17026	0.676694	0.897627	0.594393	0.567026	0.664642	0.670246
-0.09691							-0.275724	-0.619789	0.591065	0.526339	-0.0177288	0.130334	-0.00877392	0.0211893	0.0374265	-0.0409586
-0.49485									-0.251812	-0.0222764
Linear regression
	Empty	Human WT	V340 Stop	A331E	R332E	G333Y	F339E	V340E
Best-fit values
Slope	1.746	1.513	1.668	1.378	1.322	1.453	1.38	1.504
Y-intercept	0.2375	0.1436	0.1617	-0.8287	-1.155	-1.042	-0.2476	0.659
log(x) for log(y) = 1	0.436712	0.566028	0.502578	1.32707	1.63011	1.40537	0.904058	0.226729
x when y = 10	2.73346	3.68153	3.1811	21.2358	42.6684	25.4313	8.01785	1.6855
fold inhibition	0.999985	1.34682	1.16375	7.76871	15.6094	9.30356	2.93318	0.616609

## Sheet: 8-30-19
Raw data
Viral dose (uL)	Empty		Human WT		V340stop		R332P		F339E
25	98.7*	98.2*	88.3*	87*	95.8*	96.8*	24*	25*	64.2*	66.6*
10	77.3*	0*	0*	0*	0*	61.4*	11.5	10.4	0*	0*
4	45.6	46.8	22.8	20.3	34.6*	26.7*	1.91	2.03	9.2*	9.55*
1.6	18.8	19.5	8.59	9.1	23.2	21.7	1.4	1.11	5.62	5.28
0.64	8.43	8.62	3.43	3.41	7.96	7.83	0.72	0.73	2.06	2.52
0.256	4.52	3.81	1.29	1.63	3.16	5.05	1.18*	0.5*	1.63	1.26
0.1024	1.66	1.35	0.76	0.47	1.38	1.09	0.32*	0.34*	0.62	0.52
0.04096	0.9*	0.75*	0.32*	0.41*	0.77*	0.83*	0.57*	0.17*	0.28*	0.37*
Log-transformed data
Viral dose (uL)	Empty		Human WT		V340stop		R332P		F339E
1.39794
1							1.0607	1.01703
0.60206	1.65896	1.67025	1.35793	1.3075			0.281033	0.307496
0.20412	1.27416	1.29003	0.933993	0.959041	1.36549	1.33646	0.146128	0.045323	0.749736	0.722634
-0.19382	0.925828	0.935507	0.535294	0.532754	0.900913	0.893762	-0.142668	-0.136677	0.313867	0.401401
-0.59176	0.655138	0.580925	0.11059	0.212188	0.499687	0.703291			0.212188	0.100371
-0.9897	0.220108	0.130334	-0.119186	-0.327902	0.139879	0.0374265			-0.207608	-0.283997
Linear regression
	Empty	Human WT	V340stop	R332P	F339E
Best-fit values
Slope	0.9154	0.9795	1.026	0.9384	0.7909
Y-intercept	1.112	0.7401	1.138	-0.05595	0.5617
log(x) for log(y) = 1	-0.122351	0.265339	-0.134503	1.12527	0.554179
x when y = 10	0.754482	1.84221	0.733664	13.3434	3.58244
fold inhibition	0.999977	2.44163	0.972384	17.6851	4.7481

## Sheet: 9-13-19
Raw data
Viral dose (uL)	Empty		Human WT		HsT5a - R332P		HsT5a - Q337N		HsT5a - V340H
12.5	63*	55.3*	37.7	38.1	4.37	3.97	11.7	9.09	40.3	32.9
5	33.8	0*	15.4	13.4	0.74	0.97	3.34	1.68	13.9	18.3
2	19.26	9.63	3.62	4.51	0.37	0.52	0.83	1.21	3.27	3.4
0.8	12.49	8.34	0.92	1.06	0.27*	0.13*	0.41*	0.63*	1.07	1.87
0.32	4.02	2.76	0.66	0.49	0.19*	0.21*	0.55*	0.14*	0.62	0.71
0.128	0.31*	0.48*	0.2*	0.19*	0.077*	0.042*	0.17*	0.16*	0.3*	0.35*
0.0512	0.28*	0.19*	0.095*	0.31*	0.085*	0.085*	0.11*	0.066*	0.18*	0.17*
0.02048	0.15*	0*	0.16*	0.17*	0.074*	0*	0.11*	0.068*	0.12*	0.14*
Log-transformed data
Viral dose (uL)	Empty		Human WT		HsT5a - R332P		HsT5a - Q337N		HsT5a - V340H
1.09691			1.57634	1.58092	0.640481	0.598791	1.06819	0.958564	1.60531	1.5172
0.69897	1.52892		1.18752	1.1271	-0.130768	-0.0132283	0.523746	0.225309	1.14301	1.26245
0.30103	1.28466	0.983626	0.558709	0.654177	-0.431798	-0.283997	-0.0809219	0.0827854	0.514548	0.531479
-0.09691	1.09656	0.921166	-0.0362122	0.0253059					0.0293838	0.271842
-0.49485	0.604226	0.440909	-0.180456	-0.309804					-0.207608	-0.148742
Linear regression
	Empty	Human WT	HsT5a - R332P	HsT5a - Q337N	HsT5a - V340H
Best-fit values
Slope	0.7851	1.209	1.228	1.272	1.139
Y-intercept	0.9668	0.2545	-0.7953	-0.4262	0.3091
log(x) for log(y) = 1	0.0422876	0.616625	1.46197	1.12123	0.606585
x when y = 10	1.10227	4.13643	28.9715	13.2198	4.04189
fold inhibition	0.999972	3.75254	26.2828	11.993	3.66678

## Sheet: 12-27-19
Raw data
Viral dose (uL)	Empty		Human		Stop		R335A		Q337N		V340H
12.5	95.4*	95.6*	95.3*	96.7*	97.5*	97.8*	63.2*	50.6*	88.3*	90.9*	100*	97.4*
6.25	92.9*	89.8*	88.5*	90.3*	97*	95.8*	24	26.5	75.1*	76.2*	96.2*	96.2*
3.125	0*	85.5*	78.9*	81.2*	92.1*	93.1*	13.4	12.5	57.6*	54.7*	89.3*	92.6*
1.5625	71.9*	69.9*	61.3*	58.5*	80.3*	79.1*	5.76	6.42	37.6	35.4	76*	79.4*
0.78125	53.3*	52.6*	43	41.8	59*	100*		3.95	23.7	15.8	54.3*	58.8*
0.390625	38.3	34	24	27.4	38.5	43.4	1.68	1.86	12.7	14.3	36	38.3
0.195312	20.5		10.1	14.6	25.4	0*	0.89	0.55	7.09	7.73	20.6	18.4
0.0976562	12	10.8	8.29	8.5	14.5	13.8	0.73*	0.59*	4.53	4.39	12.4	11.2
Log-transformed data
Viral dose (uL)	Empty		Human		Stop		R335A		Q337N		V340H
1.09691
0.79588							1.38021	1.42325
0.49485							1.1271	1.09691
0.19382							0.760422	0.807535	1.57519	1.549
-0.10721			1.63347	1.62118				0.596597	1.37475	1.19866
-0.40824	1.5832	1.53148	1.38021	1.43775	1.58546	1.63749	0.225309	0.269513	1.1038	1.15534	1.5563	1.5832
-0.70927	1.31175		1.00432	1.16435	1.40483		-0.05061	-0.259637	0.850646	0.888179	1.31387	1.26482
-1.0103	1.07918	1.03342	0.918555	0.929419	1.16137	1.13988			0.656098	0.642465	1.09342	1.04922
Linear regression
	Empty	Human	Stop	R335A	Q337N	V340H
Best-fit values
Slope	0.8322	0.8088	0.7655	1.007	0.7451	0.8279
Y-intercept	1.898	1.713	1.929	0.6132	1.404	1.897
log(x) for log(y) = 1	-1.07907	-0.881553	-1.21359	0.384111	-0.542209	-1.08346
x when y = 10	0.0833552	0.131355	0.0611525	2.42165	0.28694	0.0825156
fold inhibition	0.999462	1.575	0.733243	29.0366	3.44053	0.989395

[truncated: 2 more sheets: 12-28-19, 12-31-19]
