# Supplementary material for: Mutational resilience of antiviral restriction favors primate TRIM5α in host-virus evolutionary arms races
Source: eLife. 2020 Sep 15;9:e59988. doi: 10.7554/eLife.59988 (PMC7492085; doi:10.7554/eLife.59988)
Supplement: Figure 3—source data 1. [file elife-59988-fig3-data1.xlsx]

## Sheet: By position
WT	G330	A331	R332	G333	T334	R335	Y336	Q337	T338	F339	V340
0.57575		1.1795	2.38966		1.173	3.12711	1.24767	1.34476	1.90897		0.759937
0.545729	1.82353	0.214402	3.73685	1.96639	1.32946	2.88677	1.13719	1.18588	0.395545	1.07335	0.757863
0.650936	1.01609		2.70806	1.66003	0.700601	2.87697	1.30158	0.320681	0.549745	0.919346	0.48964
0.622051	0.0797844	0.346983	2.7004	1.08396	0.078783	1.86736	0.303808	0.087607	0.0947518	0.853539	0.220477
0.542814	0.132628	0.665475	1.80678	1.25413	0.228056	2.61179	0.385595	0.109581	0.0712856	1.07974	0.53065
0.629421	0.103869	0.614936	2.88272	1.80332	0.182121	2.21726	0.544565	0.0920747	0.0905386	1.0989
0.63119	0.540256	0.229727	2.30756		0.109349	1.57093	0.455458	0.148547	0.135566		0.531418
	0.574139	0.445162	2.70103	1.84259	0.131005	2.38715	0.207606	0.0720349	0.12045		0.348354
0.515901	0.280585	0.190695	3.59807	1.93956	0.178038	1.7569		0.0950584	0.0854103	1.0015	0.379941
0.55924	0.171401	0.71822	2.8608	1.93075	0.366991	2.16686	0.70475	0.130297	0.141539	1.06259	0.411253
0.524901	0.496425	0.737966	2.98698	2.13338	0.622207	2.66888	0.96061	0.207872	0.20605		0.468887
	0.253855	0.617226	2.48545	1.72124	1.10949	2.77725	0.845804	1.13422	0.560797	0.94889	0.643586
	0.106877	0.716502	2.84652	1.91136		2.8282	1.1602	0.425767		1.048	0.471721
	0.834453	0.980009	1.92038		1.22718	3.17661	1.14379	1.77364	1.04981	0.836328	0.738959
	1.14473	0.724458	2.90359	1.92504	0.152501	2.23524	1.26336		0.973011	0.973614	0.29772
	0.74755	0.717829	2.42037		0.483055	3.19254	1.12635	0.688935	0.657336	0.866412	0.465301
	0.187294	0.199483	1.3389	0.726804	0.163181	1.52716	1.65631	0.204254	0.22214	0.251778	0.174928
	0.177337	0.118205		0.419041	0.143084		0.693432	0.137173	0.160754		0.133499
	2.5314	2.39448	3.08196	3.81203	2.1131	4.3789	1.09716	3.14847	1.60028	0.722197	0.137094
	2.29101	2.23403	4.22418	3.02936	1.18802	3.81899	1.27569	1.54691	1.78157	0.83515	0.283766
Holm-Sidak's multiple comparisons test	Mean Diff.	Significant?	Summary	Adjusted P Value
WT vs. G330	-0.1304	No	ns	0.9179
WT vs. A331	-0.1594	No	ns	0.6208
WT vs. R332	-2.152	Yes	****	<0.0001
WT vs. G333	-1.243	Yes	***	0.0001
WT vs. T334	-0.0349	No	ns	0.9593
WT vs. R335	-2.056	Yes	****	<0.0001
WT vs. Y336	-0.3418	No	ns	0.1297
WT vs. Q337	-0.09672	No	ns	0.9179
WT vs. T338	0.01108	No	ns	0.9593
WT vs. F339	-0.325	Yes	**	0.0048
WT vs. V340	0.1458	No	ns	0.1763

## Sheet: By amino acid
WT	G	P	A	I	L	V	F	W	Y	M	C	S	T	N	Q	H	K	R	D	E	stop
0.57575		1.82353	1.01609	0.0797844	0.132628	0.103869	0.540256	0.574139	0.280585	0.171401	0.496425	0.253855	0.106877	0.834453	1.14473	0.74755	0.187294	0.177337	2.5314	2.29101	0.268929
0.545729	1.1795	0.214402		0.346983	0.665475	0.614936	0.229727	0.445162	0.190695	0.71822	0.737966	0.617226	0.716502	0.980009	0.724458	0.717829	0.199483	0.118205	2.39448	2.23403	0.120844
0.650936	2.38966	3.73685	2.70806	2.7004	1.80678	2.88272	2.30756	2.70103	3.59807	2.8608	2.98698	2.48545	2.84652	1.92038	2.90359	2.42037	1.3389		3.08196	4.22418	0.169278
0.622051		1.96639	1.66003	1.08396	1.25413	1.80332		1.84259	1.93956	1.93075	2.13338	1.72124	1.91136		1.92504		0.726804	0.419041	3.81203	3.02936	0.211823
0.542814	1.173	1.32946	0.700601	0.078783	0.228056	0.182121	0.109349	0.131005	0.178038	0.366991	0.622207	1.10949		1.22718	0.152501	0.483055	0.163181	0.143084	2.1131	1.18802	0.262507
0.629421	3.12711	2.88677	2.87697	1.86736	2.61179	2.21726	1.57093	2.38715	1.7569	2.16686	2.66888	2.77725	2.8282	3.17661	2.23524	3.19254	1.52716		4.3789	3.81899	0.275585
0.63119	1.24767	1.13719	1.30158	0.303808	0.385595	0.544565	0.455458	0.207606		0.70475	0.96061	0.845804	1.1602	1.14379	1.26336	1.12635	1.65631	0.693432	1.09716	1.27569	0.205602
	1.34476	1.18588	0.320681	0.087607	0.109581	0.0920747	0.148547	0.0720349	0.0950584	0.130297	0.207872	1.13422	0.425767	1.77364		0.688935	0.204254	0.137173	3.14847	1.54691	0.0829747
0.515901	1.90897	0.395545	0.549745	0.0947518	0.0712856	0.0905386	0.135566	0.12045	0.0854103	0.141539	0.20605	0.560797		1.04981	0.973011	0.657336	0.22214	0.160754	1.60028	1.78157	0.123144
0.55924		1.07335	0.919346	0.853539	1.07974	1.0989			1.0015	1.06259		0.94889	1.048	0.836328	0.973614	0.866412	0.251778		0.722197	0.83515	0.150818
0.524901	0.759937	0.757863	0.48964	0.220477	0.53065		0.531418	0.348354	0.379941	0.411253	0.468887	0.643586	0.471721	0.738959	0.29772	0.465301	0.174928	0.133499	0.137094	0.283766	0.128777
Holm-Sidak's multiple comparisons test	Mean Diff.	Significant?	Summary	Adjusted P Value
WT vs. G	-1.062	No	ns	0.1227
WT vs. P	-0.9209	No	ns	0.2717
WT vs. A	-0.6745	No	ns	0.39
WT vs. I	-0.1218	No	ns	0.9595
WT vs. L	-0.2271	No	ns	0.9148
WT vs. V	-0.3832	No	ns	0.8717
WT vs. F	-0.09007	No	ns	0.9595
WT vs. W	-0.3032	No	ns	0.9148
WT vs. Y	-0.3708	No	ns	0.9148
WT vs. M	-0.3898	No	ns	0.8291
WT vs. C	-0.5691	No	ns	0.661
WT vs. S	-0.6109	No	ns	0.39
WT vs. T	-0.6997	No	ns	0.5504
WT vs. N	-0.7883	No	ns	0.153
WT vs. Q	-0.6795	No	ns	0.328
WT vs. H	-0.5568	No	ns	0.6207
WT vs. K	-0.02495	No	ns	0.9595
WT vs. R	0.332	Yes	*	0.0298
WT vs. D	-1.694	Yes	*	0.0458
WT vs. E	-1.466	No	ns	0.0745
WT vs. stop	0.3979	Yes	****	<0.0001

## Sheet: By charge
WT	stop	+3	+2	+1	0		Holm-Sidak's multiple comparisons test	Mean Diff.	Significant?	Summary	Adjusted P Value
0.650936	0.275585	0.187294	1.01609	3.81203	3.08196		WT vs. stop	0.3979	Yes	****	<0.0001
0.63119	0.268929	0.199483	1.66003	3.14847	4.3789		WT vs. +3	0.2405	Yes	*	0.0215
0.629421	0.262507	0.726804	0.700601	2.5314	4.22418		WT vs. +2	-0.1564	Yes	**	0.0043
0.622051	0.211823	0.163181	1.30158	2.39448	3.81899		WT vs. +1	-1.733	Yes	****	<0.0001
0.57575	0.205602	1.65631	0.320681	2.1131			WT vs. 0	-3.296	Yes	**	0.0043
0.55924	0.169278	0.204254	0.549745	1.60028
0.545729	0.150818	0.22214	0.919346	1.09716
0.542814	0.128777	0.251778	0.48964	0.722197
0.524901	0.123144	0.174928	0.496425	0.137094
0.515901	0.120844	0.177337	0.737966	3.02936
	0.0829747	0.118205	2.13338	2.29101
		0.419041	0.622207	2.23403
		0.143084	0.96061	1.78157
		0.693432	0.207872	1.54691
		0.137173	0.20605	1.27569
		0.160754	0.468887	1.18802
		0.133499	0.540256	0.83515
			0.229727	0.283766
			0.109349	2.70806
			0.455458	2.98698
			0.148547	2.30756
			0.135566	2.38966
			0.531418	2.42037
			1.1795	2.7004
			1.173	1.80678
			1.24767	2.8608
			1.34476	1.92038
			1.90897	3.73685
			0.759937	2.90359
			0.74755	2.48545
			0.717829	2.84652
			0.483055	2.88272
			1.12635	2.70103
			0.688935	3.59807
			0.657336	2.87697
			0.866412	2.66888
			0.465301	1.57093
			0.0797844	3.12711
			0.346983	3.19254
			1.08396	1.86736
			0.078783	2.61179
			0.303808	2.16686
			0.087607	3.17661
			0.0947518	2.88677
			0.853539	2.23524
			0.220477	2.77725
			1.3389	2.8282
			1.52716	2.21726
			0.132628	2.38715
			0.665475	1.7569
			1.25413
			0.228056
			0.385595
			0.109581
			0.0712856
			1.07974
			0.53065
			0.171401
			0.71822
			1.93075
			0.366991
			0.70475
			0.130297
			0.141539
			1.06259
			0.411253
			0.834453
			0.980009
			1.22718
			1.14379
			1.77364
			1.04981
			0.836328
			0.738959
			1.82353
			0.214402
			1.96639
			1.32946
			1.13719
			1.18588
			0.395545
			1.07335
			0.757863
			1.14473
			0.724458
			1.92504
			0.152501
			1.26336
			0.973011
			0.973614
			0.29772
			0.253855
			0.617226
			1.72124
			1.10949
			0.845804
			1.13422
			0.560797
			0.94889
			0.643586
			0.106877
			0.716502
			1.91136
			1.1602
			0.425767
			1.048
			0.471721
			0.103869
			0.614936
			1.80332
			0.182121
			0.544565
			0.0920747
			0.0905386
			1.0989
			0.574139
			0.445162
			1.84259
			0.131005
			0.207606
			0.0720349
			0.12045
			0.348354
			0.280585
			0.190695
			1.93956
			0.178038
			0.0950584
			0.0854103
			1.0015
			0.379941
