# Supplementary material for: Mutational resilience of antiviral restriction favors primate TRIM5α in host-virus evolutionary arms races
Source: eLife. 2020 Sep 15;9:e59988. doi: 10.7554/eLife.59988 (PMC7492085; doi:10.7554/eLife.59988)
Supplement: Figure 3—source data 3. [file elife-59988-fig3-data3.xlsx]

## Sheet: Sheet1
	WB 1: 2/12/20					WB 2: 2/27/20					WB 3: 3/20/20
Human TRIM5	HA signal	actin signal	HA/actin	Normalize to WT		HA signal	actin signal	HA/actin	Normalize to WT		HA signal	actin signal	HA/actin	Normalize to WT		Average
none (EV)	0	8568.39	0	0		18.536	5160.3	0.00359204	0.0118198		0	8718.02	0	0		0.00393994
WT	4551.54	7596.02	0.5992	1		2127.26	6999.59	0.303911	1.00004		4162.71	8900.08	0.467716	1.00004		1.00002
G330E	9325.39	7973.15	1.1696	1.95194		8077.44	7656.12	1.05503	3.47163		11004.2	9445.37	1.16503	2.49098		2.63818
R332E	8800.27	6697.25	1.31401	2.19295		8201.68	5856.81	1.40037	4.60798		10845.4	7644.59	1.41871	3.03337		3.2781
R332P	9823.24	7778.02	1.26295	2.10772		10574.3	6924.71	1.52703	5.02479		10853	9079.2	1.19537	2.55585		3.22946
G333D	4147.54	8043.02	0.515669	0.860596		2218.74	8297.32	0.267405	0.87991		4352.95	9415.37	0.462324	0.988506		0.909671
G333Y	4838.61	6605.3	0.732535	1.22252		1918.2	5145.98	0.372758	1.22658		3800.83	6318.28	0.601562	1.28621		1.2451
R335A	9922.97	7997.25	1.2408	2.07076		12177.1	6366.1	1.91281	6.29421		12464.3	7716.81	1.61522	3.45354		3.9395
R335E	9964.22	8356.32	1.19242	1.99002		9087.32	6522.52	1.39322	4.58448		12409.6	8697.12	1.42686	3.0508		3.20843
Q337D	8059.39	6463.52	1.2469	2.08095		6157.25	5219.5	1.17966	3.88175		9592.63	7178.1	1.33637	2.85733		2.94001
Q337N	7572.58	7555.2	1.0023	1.67273		5173.54	5917.93	0.874214	2.87665		5535.25	6787.69	0.815483	1.7436		2.09766
V340H	5385.54	5749.4	0.936714	1.56327		2945.74	4643.91	0.634323	2.08728		7983.85	7871.37	1.01429	2.16868		1.93974
V340 Stop	0	5195.15	0	0		0	3959.96	0	0		0	6196.47	0	0		0
