# Supplementary material for: Mutational resilience of antiviral restriction favors primate TRIM5α in host-virus evolutionary arms races
Source: eLife. 2020 Sep 15;9:e59988. doi: 10.7554/eLife.59988 (PMC7492085; doi:10.7554/eLife.59988)
Supplement: Figure 3—source data 4. [file elife-59988-fig3-data4.xlsx]

## Sheet: Summary
	HIV-1 fold restriction
		Human TRIM5 Variant
Date	Empty vector	WT	R332P	R335A	R332P/R335A	R335E	R332P/R335E	Q337D	R332P/Q337D	Q337N	R332P/Q337N
2019-05-24	1	2.66	28.15			29.29		14.12
2019-05-25	1		68.43			24.61		12.25
2019-07-09	1	2.07888	20.3307			21.2191		12.4215
2019-07-12	1	1.7396
2019-07-13	1	1.35
2019-08-30	1	2.44	17.69
2019-09-13	1	3.75	31.73							13.52
2019-12-27	1	1.58		29.04	24.88		0.85		20.29	3.44	12.73
2019-12-28	1	2.82169		60.8237	39.5082				33.95	7.13	21.8415
2019-12-31	1	3.1		71.88	86.42		2.58		54.58	7.28	32.37
2020-03-16	1						1.1324
Average	1	2.39113	33.2661	53.9146	50.2694	25.0397	1.5208	12.9305	36.2733	7.8425	22.3138
NB: For raw HIV-1 data from dates 5/24/19-9/13/19, see Figure 2 – source data 2
Holm-Sidak's multiple comparisons test	Mean Diff.	Significant?	Summary	Adjusted P Value
WT vs. R332P	-30.87	Yes	***	0.0003
WT vs. R335A	-51.52	Yes	****	<0.0001
WT vs. R335E	-22.65	Yes	*	0.043
WT vs. Q337D	-10.54	No	ns	0.5808
WT vs. Q337N	-5.451	No	ns	0.7021
R332P vs. R332P/R335A	-17	No	ns	0.2644
R332P vs. R332P/R335E	31.75	Yes	**	0.0058
R332P vs. R332P/Q337D	-3.007	No	ns	0.7333
R332P vs. R332P/Q337N	10.95	No	ns	0.5808

## Sheet: 12-27-19
Raw data
Viral dose (uL)	Empty		Human		R335A		Q337N		R332P + R335A		R332P + R335E		R332P + Q337D		R332P + Q337N
6.25	92.9*	89.8*	88.5*	90.3*	24	26.5	75.1*	76.2*	30.1	28.2	94.1*	72.2*	34	32.6	48.6*	54*
3.125	0*	85.5*	78.9*	81.2*	13.4	12.5	57.6*	54.7*	17.3	11.8	65.4*	65.8*	18.1	19.7	30.5	27.1
1.5625	71.9*	69.9*	61.3*	58.5*	5.76	6.42	37.6	35.4	8.22	7.46	74.5*	64.1*	11	12.5	16.8	14.4
0.78125	53.3*	52.6*	43	41.8		3.95	23.7	15.8	4.66	2.67	54.3*	59.5*	4.39	2.49	6.34	7.25
0.390625	38.3	34	24	27.4	1.68	1.86	12.7	14.3	2.48	2.05	36.7	37.7	2.71	2.12	3.25	4.34
0.195312	20.5		10.1	14.6	0.89	0.55	7.09	7.73	1.28	1.2	20.1	20.2	1.31	1.96	2.46	1.54
0.0976562	12	10.8	8.29	8.5	0.73*	0.59*	4.53	4.39	0.93	0.63	13.3	13	0.83	0.46	1.47*	0*
Log-transformed data
Viral dose (uL)	Empty		Human		R335A		Q337N		R332P + R335A		R332P + R335E		R332P + Q337D		R332P + Q337N
0.79588					1.38021	1.42325			1.47857	1.45025			1.53148	1.51322
0.49485					1.1271	1.09691			1.23805	1.07188			1.25768	1.29447	1.4843	1.43297
0.19382					0.760422	0.807535	1.57519	1.549	0.914872	0.872739			1.04139	1.09691	1.22531	1.15836
-0.10721			1.63347	1.62118		0.596597	1.37475	1.19866	0.668386	0.426511			0.642465	0.396199	0.802089	0.860338
-0.40824	1.5832	1.53148	1.38021	1.43775	0.225309	0.269513	1.1038	1.15534	0.394452	0.311754	1.56467	1.57634	0.432969	0.326336	0.511883	0.63749
-0.70927	1.31175		1.00432	1.16435	-0.05061	-0.259637	0.850646	0.888179	0.10721	0.0791812	1.3032	1.30535	0.117271	0.292256	0.390935	0.187521
-1.0103	1.07918	1.03342	0.918555	0.929419			0.656098	0.642465	-0.0315171	-0.200659	1.12385	1.11394	-0.0809219	-0.337242
Linear regression
	Empty	Human	R335A	Q337N	R332P + R335A	R332P + R335E	R332P + Q337D	R332P + Q337N
Best-fit values
Slope	0.8322	0.8088	1.007	0.7451	0.8786	0.7501	0.9523	0.9819
Y-intercept	1.898	1.713	0.6132	1.404	0.7215	1.863	0.7824	0.9744
log(x) for log(y) = 1	-1.07907	-0.881553	0.384111	-0.542209	0.316982	-1.15051	0.228499	0.0260719
x when y = 10	0.0833552	0.131355	2.42165	0.28694	2.07483	0.070711	1.69239	1.06187
fold inhibition	0.999462	1.575	29.0366	3.44053	24.878	0.847853	20.2924	12.7323

## Sheet: 12-28-19
Raw data
Viral dose (uL)	Empty		Human		Stop		R335A		Q337N		V340H		R332P + R335A		R332P + R335E		R332P + Q337D		R332P + Q337N		R332P + V340H
12.5	98*	97.6*	96.5*	97.1*	97.2*	96.6*	45.2	47.4	94*	94.7*	98.9*	98.9*	42	37.8	96.7*	97.4*	56.8*	56.9*	70.4*	73.1*	94.3*	94.5*
6.25	96*	95.3*	91.8*	90.5*	96.3*	97.1*	23.9	24.2	81.6*	80.3*	95.3*	96.1*	19.8	21.4	90.5*	93*	31.3	31.8	44.9	44.5	85.7*	87.2*
3.125	91.3*	88.9*	83.8*	80.8*	87.1*	90.9*	15.6	14.3	66.6*	65.6*	86.3*	87.8*	12.2	11.5	81.2*	80.8*	15.6	19.8	24.8	26.9	73.4*	72.1*
1.5625	77.8*	78.7*	61.8*	61.9*	75.9*	79.4*	7.47	7.31	40.3	43.9	69.6*	72.1*	5.96	5.27	61.2*	67.4*	9.35	10.6	21.4	14.3	57*	58.8*
0.78125	54.6*	62.5*	44	44.8	58.2*	60.5*	3.88	3.72	27.3	28.7	50	51.5	3.32*	7.45*	50.3	46.4	4.26	4.41	7.71	8.46	32.7	38.1
0.390625	45.3	52.1	27.4	30.6	40.9	43	1.78	1.97	15.9	16.6	29	23.3	2.04*	1.55*	31.9	30.9	2.58	2.5	3.77	4.07	22.2	20.9
0.195312	31.2	33.4	16.2	17.7	25.4	27.5	1.35*	1.13*	8.09	8.41	3.52*	2.35*	0.99*	0.99*	18.8	19.7	1.46	1.5	2.46	2.3	11.7	6.55*
0.0976562	20.5	20	10	9.47	16.3	15.6	0.64*	0.61*	5.49*	5.23*	9.58	10.5	0.51*	0.5*	11.9	10.9	0.86	0.76	1.4	1.21	6.64	7.87
Log-transformed data
Viral dose (uL)	Empty		Human		R335A		Q337N		R332P + R335A		R332P + Q337D		R332P + Q337N
1.09691
0.79588					1.48714	1.48855			1.62737	1.65031	1.68034	1.6902
0.49485					1.19866	1.16137			1.40483	1.35793	1.4183	1.5172	1.59879	1.58206
0.19382					0.950365	0.914343	1.66558	1.67025	1.13033	1.06819	1.19866	1.17026	1.31175	1.36361
-0.10721			1.72997	1.68931	0.739572	0.673021	1.43616	1.46538	0.854306	0.783904	0.832509	0.877371	1.04532
-0.40824	1.72673	1.70243	1.49415	1.49136	0.378398	0.334454	1.24551	1.22011
-0.70927	1.51322	1.50243	1.26245	1.24551	0.00860017	0.0211893	0.917506	0.944976
-1.0103	1.31806	1.33445	1.05308	1.02531			0.68842	0.744293
Linear regression
	Empty	Human	R335A	Q337N	R332P + R335A	R332P + Q337D	R332P + Q337N
Best-fit values
Slope	0.645	0.7475	0.955	0.8048	0.9106	0.9216	0.896
Y-intercept	1.974	1.792	0.7383	1.528	0.9211	0.9808	1.153
log(x) for log(y) = 1	-1.51008	-1.05953	0.274031	-0.656064	0.0866462	0.0208333	-0.170759
x when y = 10	0.0308974	0.0871903	1.87945	0.220768	1.2208	1.04914	0.674903
fold inhibition	0.999917	2.82169	60.8237	7.1446	39.5082	33.9527	21.8415

## Sheet: 12-31-19
Raw data
Viral dose (uL)	Empty		Human		R335A		Q337N		R332P + R335A		R332P + R335E		R332P + Q337D		R332P + Q337N
12.5	98*	97.6*	96.5*	97.1*	45.2	47.4	94*	94.7*	42	37.8	96.7*	97.4*	56.8*	56.9*	70.4*	73.1*
6.25	96*	95.3*	91.8*	90.5*	23.9	24.2	81.6*	80.3*	19.8	21.4	90.5*	93*	31.3	31.8	44.9	44.5
3.125	91.3*	88.9*	83.8*	80.8*	15.6	14.3	66.6*	65.6*	12.2	11.5	81.2*	80.8*	15.6	19.8	24.8	26.9
1.5625	77.8*	78.7*	61.8*	61.9*	7.47	7.31	40.3	43.9	5.96	5.27	61.2*	67.4*	9.35	10.6	21.4	14.3
0.78125	54.6*	62.5*	44	44.8	3.88	3.72	27.3	28.7	3.32*	7.45*	50.3*	46.4*	4.26	4.41	7.71	8.46
0.390625	45.3	52.1	27.4	30.6	1.78	1.97	15.9	16.6	2.04	1.55	31.9	30.9	2.58	2.5	3.77	4.07
0.195312	31.2	33.4	16.2	17.7	1.35*	1.13*	8.09	8.41	0.99	0.99	18.8	19.7	1.46	1.5	2.46	2.3
0.0976562	20.5	20	10	9.47	0.64*	0.61*	5.49	5.23	0.51*	0.5*	11.9	10.9	0.86	0.76	1.4	1.21
Log-transformed data
Viral dose (uL)	Empty		Human		R335A		Q337N		R332P + R335A		R332P + R335E		R332P + Q337D		R332P + Q337N
1.09691					1.65514	1.67578			1.62325	1.57749
0.79588					1.3784	1.38382			1.29667	1.33041			1.49554	1.50243	1.65225	1.64836
0.49485					1.19312	1.15534			1.08636	1.0607			1.19312	1.29667	1.39445	1.42975
0.19382					0.873321	0.863917	1.60531	1.64246	0.775246	0.721811			0.970812	1.02531	1.33041	1.15534
-0.10721			1.64345	1.65128	0.588832	0.570543	1.43616	1.45788					0.62941	0.644439	0.887054	0.92737
-0.40824	1.6561	1.71684	1.43775	1.48572	0.25042	0.294466	1.2014	1.22011	0.30963	0.190332	1.50379	1.48996	0.41162	0.39794	0.576341	0.609594
-0.70927	1.49415	1.52375	1.20952	1.24797			0.907949	0.924796	-0.00436481	-0.00436481	1.27416	1.29447	0.164353	0.176091	0.390935	0.361728
-1.0103	1.31175	1.30103	1	0.97635			0.739572	0.718502			1.07555	1.03743	-0.0655015	-0.119186	0.146128	0.0827854
Linear regression
	Empty	Human	R335A	Q337N	R332P + R335A	R332P + R335E	R332P + Q337D	R332P + Q337N
Best-fit values
Slope	0.6313	0.7343	0.9183	0.7708	0.8894	0.7315	0.8918	0.8695
Y-intercept	1.948	1.742	0.6741	1.5	0.6132	1.798	0.7901	0.9927
log(x) for log(y) = 1	-1.50166	-1.01049	0.354895	-0.648677	0.4349	-1.09091	0.235367	0.00839563
x when y = 10	0.0315019	0.0976144	2.2641	0.224555	2.72207	0.0811131	1.71936	1.01952
fold inhibition	1.00006	3.09887	71.8761	7.12874	86.415	2.57502	54.5828	32.3657

## Sheet: 3-16-20
Raw data
Viral dose (uL)	Empty	R332P + R335E
16.6667	86.1*	99.5*
6.6667	98.2*	99.1*
2.6667	92.5*	81.3*
1.0667	76.5*	55.8*
0.4267	54.9	34.8
0.1707	28.8	24.3
0.0683	10.3	8.82
0.0273	42*	7.73*
Log-transformed data
Viral dose (uL)	Empty	R332P + R335E
1.22185
0.823911
0.425974
0.0280423
-0.369877	1.73957	1.54158
-0.767766	1.45939	1.38561
-1.16558	1.01284	0.945469
Linear regression
	Empty	R332P + R335E
Best-fit values
Slope	0.9133	0.7492
Y-intercept	2.105	1.866
log(x) for log(y) = 1	-1.2099	-1.1559
x when y = 10	0.061674	0.0698394
fold inhibition	0.999578	1.13192
