# Supplementary material for: Mutational resilience of antiviral restriction favors primate TRIM5α in host-virus evolutionary arms races
Source: eLife. 2020 Sep 15;9:e59988. doi: 10.7554/eLife.59988 (PMC7492085; doi:10.7554/eLife.59988)
Supplement: Figure 4—source data 1. [file elife-59988-fig4-data1.xlsx]

## Sheet: HIV-1
Replicate 1 (data for figure 4S1): 2/28/20
Viral dose (uL)	Empty vector		Human		Human-v1rhesus		Rhesus
16.67	99.1	98.5	88.6	89.2	27.8	28.1	8.81	9.05
5.55667	89.7	86	55	56.6	10.1	9.17	2.87	2.37
1.85222	55.6	51.5	23.2	22.1	3.2	3.1	0.52	0.9
0.617407	22.8	19.5	6.77	7.96	1.26	0.86	0.18	0.23
0.205802	7.6	7.16	2.28	2.69	0.59	0.43	0.064	0.096
0.0686008	2.61	2.28	0.57	0.75	0.098	0.16	0.034	0.017
0.0228669	0.84	0.75	0.25	0.34	0.049	0.033	0.035	0.052
0.00762231	0.4	0.15	0.1	0.019	0	0.034	0.035	0
Replicate 2: 4/22/19
Viral dose (uL)	Empty vector		Human		Human-v1rhesus		Rhesus
4.16667	81.4	75	65	64.9	4.48	5.24	1.29	1.39
1.66667	49.7	46.3	32.6	34.9	2.05	1.73	0.45	0.34
0.666667	24.1	21.5	14.4	15.3	0.6	0.53	0.081	0.12
0.266667	11	10.7	4.81	6.25	0.26	0.083	0.067	0.065
0.106667	4.56	4.99	1.96	1.89	0.083	0.032	0	0
0.0426667	1.73	1.57	0.77	0.82	0	0.064
0.0170667	0.76	0.64	0.2	0.31	0	0
0.00682667	0.36	0.33	0.23	0.075	0	0.034
Replicate 3: 2/7/20
Viral dose (uL)	Empty vector		Human		Human-v1rhesus		Rhesus
5.55556	99.8	99.8	97.6	97.4	50.9	51.4	17.9	15.6
2.77778	97.6	96.6	83.6	82.4	23.6	22.7	5.84	5.86
1.38889	84.7	78.8	54	49.8	12	12.2	2.56	2.21
0.694444	49.8	45.4	23	22.6	5.21	5.8	0.9	0.99
0.347222	22.7	17.1	8.35	7.33	1.75	1.53	0.49	0.28
0.173611	7.81	7.32	2.96	2.57	0.49	0.79	0.024	0.097
0.0868056	2.5	2.31	0.84	1.1	0.18	0.059	0	0.075
0.0434028	1.09	0.93	0.3	0.37	0.096	0.081	0	0

## Sheet: HIV-2
Replicate 1 (data for figure 4S1): 3/4/20
Viral dose (uL)	Empty vector		Human		Human-v1rhesus		Rhesus
16.6667	39.2	37.6	21.3	22.1	1.77	1.27	0.51	0.44
5.55556	17.7	18	8.35	10	0.43	0.46	0.16	0.13
1.85185	6.51	7.95	3.35	2.72	0.076	0.14	0.05	0.048
0.617284	2.09	2.21	1.13	0.99
0.205761	0.8	0.65	0.34	0.22
0.0685871	0.17	0.12	0.05	0.069
Replicate 2: 2/3/20
Viral dose (uL)	Empty vector		Human		Human-v1rhesus		Rhesus
16.67	23.4	25.4	12	17.2	3.97	3.2	0.37	0.38
5.55667	8.01	8.51	4.27	5.85	1.53	1.12	0.11	0.13
1.85222	2.34	2.33	1.63	1.66	0.3	0.33	0	0
0.617407	0.82	0.86	0.39	0.5	0.22	0.11	0	0.034
0.205802	0.28	0.31	0.13	0.18	0.06	0.065	0	0
0.0686008	0.089	0.044	0.075	0.076	0.015	0	0.034	0
0.0228669	0.043	0.014	0	0.031	0.077	0.036	0.083	0.05
0.00762231	0.028	0.03	0.015	0	0.03	0	0.017	0
Replicate 3: 3/5/20
Viral dose (uL)	Empty vector		Human		Human-v1rhesus		Rhesus
5.55556	3.2	3.5	3.5	2.28	0.87	0.6	0.33	0.68
1.85185	1.89	1.05	0.57	0.33	0.25	0.081	0.022	0.11
0.617284	0.28	0.21	0.21	0	0.066	0.12	0	0

## Sheet: SIVcpz
Replicate 1 (data for figure 4S1): 3/4/20
Viral dose (uL)	Empty vector		Human		Human-v1rhesus		Rhesus
50	97.1	99.7	99.3	99.3	99.1	99.4	99.4	98.9
16.6667	99.6	99.6	99.7	99.7	86.9	87.6	78.5	79.5
5.55556	99.7	99.4	99.7	99.7	42.6	43.2	21.8	21.7
1.85185	99.6	99.5	98	98.3	18.3	17.4	5.76	5.66
0.617284	96.5	96.5	82.9	83.4	7.08	7.1	1.86	1.8
0.205761	78	78.4	50.5	53	2.63	2.6	0.84	0.55
0.0685871	48.9	48.4	21.2	23.6	1.12	1.11	0.21	0.35
0.0228624	21.6	23.3	6.31	7.39	0.5	0.47	0.033	0.15
Replicate 2: 2/7/20
Viral dose (uL)	Empty vector		Human		Human-v1rhesus		Rhesus
16.67	45.2	42.7	21.8	25.8	4.18	3.5	0.67	0.9
5.55667	14.9	15	6.03	7.48	1.35	0.98	0.26	0.13
1.85222	4.91	5.72	2.17	2.45	0.37	0.24	0.11	0.045
0.617407	1.63	1.88	0.55	0.75	0.098	0.058	0.067	0.024
0.205802	0.65	0.71	0.4	0.33	0.02	0.061	0.023	0.049
0.0686008	0.36	0.17	0.098	0.14	0	0.042	0	0
0.0228669	0.058	0.12	0.019	0.041	0.021	0	0	0
0.00762231	0.056	0.019	0	0	0	0	0	0
Replicate 3: 2/3/20
Viral dose (uL)	Empty vector		Human		Human-v1rhesus		Rhesus
5.55556	24.6	25.9	16.6	20.1	3.78	3.12	0.2	0.17
1.85185	9.05	9.48	5.86	6.66	1.31	0.95	0.17	0.014
0.617284	3.17	3.58	2.17	2.32	0.54	0.39	0.041
0.205761	1.33	0.91	0.61	0.78	0.11	0.17	0.014	0
0.0685871	0.39	0.35	0.2	0.25	0.04	0.039	0	0
0.0228624	0.086	0.11	0.017	0.13	0.027	0.013	0	0
0.00762079	0.11	0.018	0.047	0.032	0.028	0	0.015	0
0.00254026	0.017	0.037	0	0	0	0.014	0.015	0

## Sheet: SIVmac
Replicate 1 (data for figure 4S1): 2/3/20
Viral dose (uL)	Empty vector		Human		Human-v1rhesus		Rhesus
5.55556	90.9	86	84.9	81.5	77	76.7	39.9	38.9
1.85185	60.2	53.9	50.2	49.2	43.6	42.5	15	16.8
0.617284	26.4	23.2	22.4	21.7	18.7	19.4	5.33	6.75
0.205761	10.5	7.58	7.91	7.64	7.13	7.01	2.14	2.12
0.0685871	3.78	3.23	2.62	2.85	2.14	2.37	0.64	0.78
0.0228624	1.2	0.79	0.85	0.87	0.53	0.71	0.34	0.16
0.00762079	0.29	0.3	0.28	0.3	0.17	0.26	0.18	0.078
0.00254026	0.16	0.071	0.11	0.074	0.11	0.18	0.015	0.045
Replicate 2: 2/7/20
Viral dose (uL)	Empty vector		Human		Human-v1rhesus		Rhesus
5.55556	95.4	94.5	94.2	94.3	95.8	94.6	73.1	71.6
1.85185	78.2	72.9	67	68.4	75.4	72.2	38.6	39.2
0.617284	46.4	41.8	38.9	37.4	40.3	40	17.9	17.6
0.205761	21.6	19.5	14.5	15.1	16.9	17.5	6.68	6.71
0.0685871	8.39	6.21	5.47	5.45	6.17	6.72	2.5	2.11
0.0228624	2.6	2.39	2.17	1.8	1.8	2.38	0.7	0.77
0.00762079	1.08	0.74	0.74	0.44	0.64	0.78	0.37	0.28
0.00254026	0.43	0.19	0.19	0.28	0.31	0.22	0.017	0.067
Replicate 3: 2/27/20
Viral dose (uL)	Empty vector		Human		Human-v1rhesus		Rhesus
16.67	96.3	94.4	91.1	91.2	89.1	94	68	67.4
5.55667	73.5	70.8	57.4	62.1	66.8	68.5	36.3	35.6
1.85222	42.4	39.7	28	29.1	35.4	36.1	14.3	15.2
0.617407	18.1	15.4	11	10.9	13.3	12.9	5.59	4.55
0.205802	6.42	4.67	3.71	3.98	4.35	4.67	1.64	1.73
0.0686008	1.94	1.56	0.95	0.86	0.94	1.4	0.48	0.43
0.0228669	0.72	0.64	0.27	0.35	0.43	0.31	0.079	0.22
0.00762231	0.25	0.16	0.072	0.11	0.12	0.12	0.048	0.047
