# Supplementary material for: Mutational resilience of antiviral restriction favors primate TRIM5α in host-virus evolutionary arms races
Source: eLife. 2020 Sep 15;9:e59988. doi: 10.7554/eLife.59988 (PMC7492085; doi:10.7554/eLife.59988)
Supplement: Figure 4—source data 2. [file elife-59988-fig4-data2.xlsx]

## Sheet: HIV-1
	HIV-1 Fold Restriction
Human TRIM5 variant	2019-05-24	2019-05-25	2019-06-07	2019-07-09	2019-07-12	2019-07-13	2019-08-30	2019-09-13	2019-12-27	2019-12-28	2019-12-31
WT	2.65925			2.07893	1.73967	1.34682	2.44163	3.75254	1.575	2.82169	3.1
R332P	28.1466	68.4343		20.3312			17.6851	31.7315
R335A									29.0366	60.8237	71.88
R332E				24.2836	15.2604	15.6094
R335E	29.2873	24.6115		21.2195
G330E	33.6029	30.4578		9.95852
G333D	22.8198	22.5936	15.6431	9.20683
Q337D	14.1206	12.2532		12.4218
G333Y				7.35443	11.4966	9.30356
Q337N								13.521	3.44053	7.13	7.28
V340stop				1.27828	1.27845	1.16375	0.972384		0.733243	0.82453	1.57
NB: For raw HIV-1 data, see Figure 2 – source data 2

## Sheet: SIVcpz
	SIVcpz fold restriction					2019-12-27	Raw data
Human TRIM5 variant	2019-12-27	2019-12-28	2019-12-31	Average			Viral dose (uL)	Empty		Human		Stop		G330E		R332E		R332P		G333D		G333Y		R335A		R335E		Q337D		Q337N
WT	1.97705	2.49196	1.73017	2.06639			12.5	99.7*	98.6*	99.4*	99.5*	99.8*	99.5*	85.1*	84*	75*	81.7*	75*	77*	87.3*	84.9*	92.7*	93.8*	69.1*	66.8*	76.5*	73.9*	78.9*	75.9*	95.3*	95.2*
R332P	21.9468	27.4798	31.7791	27.0686			6.25	98.3*	96.1*	97*	97*	99.1*	99*	60.3*	59.9*	54.5*	54.7*	48.4	50.1	59.7*	57.9*	77.9*	79.5*	37.2	39.2	46.6	47.3	48.9	50.9	85.3*	85.2*
R335A	32.9809	42.512	24.8243	33.4391			3.125	94.3*	90*	89.5*	89.2*	94.8*	94.3*	38.4	36.1	31.3	29.1	29.7	28.7	39.6	36.9	60.1*	57.9*	21.5	20.4	26.5	26.9	28.8	27.6	65.1*	65.8*
R332E	23.6437	33.0559	26.1386	27.6128			1.5625	84.3*	78.5*	70.9*	71.5*	83.9*	81.7*	24	20.5	15.4	15.6	15	17.1	24.4	21.9	39.1	37.6	10.8	11.6	14.5	14	16.2	14.8	44.2*	44.7*
R335E	25.6034	33.0811	35.4699	31.3848			0.78125	67.8*	62.1*	52.1	54.5	65.3*	60.2*	12.4	11	7.95	7.29	7.66	9.21	13.5	12.3	23.2	22.9	5.93	5.71	7.73	7.05	7.75	8.44	30.1	30.2
G330E	15.9441	23.5802	16.0457	18.5233			0.390625	47.6	46.5	33.3	33.3	45.5	43.3	6.58	4.95	3.9	3.78	4.17	5.81	7.46	6.95	12.9	14	3.3	3.12	3.88	3.73	4.23	4.17	16.2	17.6
G333D	14.1595	14.5822	35.0797	21.2738			0.195312	29.5	29.3	20.6	18.7	27.1	27.2	3.22	3.43	2.12	2.14	2.5	2.54	3.59	3.78	6.53	6.22	1.74	1.44	2.06	1.99	2.05	2.31	8.83	9.65
Q337D	23.9826	29.7262	19.7497	24.4862			0.0976562	18.7	17	11.2	10.6	18	18.1	1.77	1.96	1.08	1.19	1.39	1.48	2.54*	2.54*	2.85	3.27	1.01	0.87	1.2	1.26	1.23	1.03	4.68	6.15
G333Y	7.64551	9.16007	10.5586	9.12139
Q337N	4.92039	6.91321	4.04354	5.29238			Log-transformed data
V340stop	0.945872	1.32691	1.43414	1.23564			Viral dose (uL)	Empty		Human		Stop		G330E		R332E		R332P		G333D		G333Y		R335A		R335E		Q337D		Q337N
							1.09691
							0.79588											1.68485	1.69984					1.57054	1.59329	1.66839	1.67486	1.68931	1.70672
							0.49485							1.58433	1.55751	1.49554	1.46389	1.47276	1.45788	1.5977	1.56703			1.33244	1.30963	1.42325	1.42975	1.45939	1.44091
							0.19382							1.38021	1.31175	1.18752	1.19312	1.17609	1.233	1.38739	1.34044	1.59218	1.57519	1.03342	1.06446	1.16137	1.14613	1.20952	1.17026
							-0.10721			1.71684	1.7364			1.09342	1.04139	0.900367	0.862728	0.884229	0.96426	1.13033	1.08991	1.36549	1.35984	0.773055	0.756636	0.888179	0.848189	0.889302	0.926342	1.47857	1.48001
							-0.40824	1.67761	1.66745	1.52244	1.52244	1.65801	1.63649	0.818226	0.694605	0.591065	0.577492	0.620136	0.764176	0.872739	0.841985	1.11059	1.14613	0.518514	0.494155	0.588832	0.571709	0.62634	0.620136	1.20952	1.24551
							-0.70927	1.46982	1.46687	1.31387	1.27184	1.43297	1.43457	0.507856	0.535294	0.326336	0.330414	0.39794	0.404834	0.555094	0.577492	0.814913	0.79379	0.240549	0.158362	0.313867	0.298853	0.311754	0.363612	0.945961	0.984527
							-1.0103	1.27184	1.23045	1.04922	1.02531	1.25527	1.25768	0.247973	0.292256	0.0334238	0.075547	0.143015	0.170262			0.454845	0.514548	0.00432137	-0.0604807	0.0791812	0.100371	0.0899051	0.0128372	0.670246	0.788875
							Linear regression
								Empty	Human	Stop	G330E	R332E	R332P	G333D	G333Y	R335A	R335E	Q337D	Q337N
							Best-fit values
							Slope	0.6999	0.7633	0.6491	0.8816	0.95	0.8598	0.8433	0.9156	0.9035	0.8968	0.9173	0.8343
							Y-intercept	1.96	1.821	1.906	1.149	0.998	1.026	1.186	1.447	0.8675	0.9671	0.9924	1.567
							log(x) for log(y) = 1	-1.37162	-1.07559	-1.39578	-0.169011	0.00210526	-0.0302396	-0.220562	-0.488204	0.146652	0.036686	0.00828518	-0.679612
							x when y = 10	0.0424987	0.0840247	0.0401996	0.677625	1.00486	0.93274	0.60178	0.324934	1.40169	1.08814	1.01926	0.209117
							fold inhibition	0.999969	1.97705	0.945872	15.9441	23.6437	21.9468	14.1595	7.64551	32.9809	25.6034	23.9826	4.92039
						2019-12-28	Raw data
							Viral dose (uL)	Empty		Human		Stop		G330E		R332E		R332P		G333D		G333Y		R335A		R335E		Q337D		Q337N
							12.5	99.5*	99.2*	99.3*	99.3*	99.9*	99.9*	82.3*	82.4*	82.6*	81.1*	77.2*	76.9*	90.1*	87.6*	93*	93.4*	68.5*	70.4*	71.5*	69.7*	79.5*	78.1*	96.1*	95.8*
							6.25	98.3*	96.4*	97.1*	97.5*	99.1*	99.1*	57.5*	56.3*	53.2*	50.5*	47.8	53.3	65.8*	60.4*	77.2*	80.3*	40.4	42.5	51.6*	50.9*	53.5*	53.6*	84.4*	83.7*
							3.125	95.4*	90.3*	88*	89.7*	96*	94.9*	36.1	36.6	29	27.3	31.2	33.8	46.1	41.2	64.6*	63.4*	23.1	23.2	28.7	29.9	32.2	32.9	65.7*	66*
							1.5625	88.5*	81.9*	72.4*	72.9*	82.5*	83.5*	19.4	20.8	16.9	17.6	18.3	19.1	27.4	25.8	44.2	41.9	13.5	13.3	15.6	14.2	19.9	18.5	46	47
							0.78125	69.5*	65.9*	52*	52.2*	64.3*	65.4*	11.8	12.4	8.05	8.53	8.44	10.5	14.9	14.9	24.4	25.4	6.56	7.02	8.31	8.43	9.64	8.8	27	27.4
							0.390625	46.5	46.8	33.5	34.2	45.1	46.3	6.78	6.69	4.51	4.29	5.09	6.51	9.88	8.83	15.2	14.6	3.73	3.59	4.7	4.19	4.48	4.54	16.7	18.1
							0.195312	32.3	33	20.4	19.4	31.5	25.4	3.35	2.88	2.26	1.88	3.04	2.86	5.06	5.96	7.86	6.15	2.04	1.45	2.46	2.47	2.28	2.64	9.47	9.58
							0.0976562	21.5	19.2	12.9	12.2	19.7	17.4	1.73	1.8	1.48	1.1	1.97	1.68	3.53	3.69	4.21	4.81	1.16*	1.27*	1.23	1.41	1.29	1.14	5.58*	7.31*
							Log-transformed data
							Viral dose (uL)	Empty		Human		Stop		G330E		R332E		R332P		G333D		G333Y		R335A		R335E		Q337D		Q337N
							1.09691
							0.79588											1.67943	1.72673					1.60638	1.62839
							0.49485							1.55751	1.56348	1.4624	1.43616	1.49415	1.52892	1.6637	1.6149			1.36361	1.36549	1.45788	1.47567	1.50786	1.5172
							0.19382							1.2878	1.31806	1.22789	1.24551	1.26245	1.28103	1.43775	1.41162	1.64542	1.62221	1.13033	1.12385	1.19312	1.15229	1.29885	1.26717	1.66276	1.6721
							-0.10721							1.07188	1.09342	0.905796	0.930949	0.926342	1.02119	1.17319	1.17319	1.38739	1.40483	0.816904	0.846337	0.919601	0.925828	0.984077	0.944483	1.43136	1.43775
							-0.40824	1.66745	1.67025	1.52504	1.53403	1.65418	1.66558	0.83123	0.825426	0.654177	0.632457	0.706718	0.813581	0.994757	0.945961	1.18184	1.16435	0.571709	0.555094	0.672098	0.622214	0.651278	0.657056	1.22272	1.25768
							-0.70927	1.5092	1.51851	1.30963	1.2878	1.49831	1.40483	0.525045	0.459392	0.354108	0.274158	0.482874	0.456366	0.704151	0.775246	0.895423	0.788875	0.30963	0.161368	0.390935	0.392697	0.357935	0.421604	0.97635	0.981366
							-1.0103	1.33244	1.2833	1.11059	1.08636	1.29447	1.24055	0.238046	0.255273	0.170262	0.0413927	0.294466	0.225309	0.547775	0.567026	0.624282	0.682145			0.0899051	0.149219	0.11059	0.0569049
							Linear regression
								Empty	Human	Stop	G330E	R332E	R332P	G333D	G333Y	R335A	R335E	Q337D	Q337N
							Best-fit values
							Slope	0.5996	0.716	0.6517	0.8785	0.9263	0.8216	0.7277	0.8355	0.9119	0.8878	0.9618	0.7508
							Y-intercept	1.922	1.817	1.922	1.145	1.017	1.081	1.272	1.481	0.9171	1.016	1.062	1.524
							log(x) for log(y) = 1	-1.53769	-1.14106	-1.41476	-0.165054	-0.0183526	-0.0985881	-0.37378	-0.575703	0.0909091	-0.0180221	-0.0644625	-0.697922
							x when y = 10	0.028994	0.0722668	0.0384803	0.683827	0.958622	0.796915	0.422882	0.265642	1.23285	0.959352	0.86206	0.200483
							fold inhibition	0.999793	2.49196	1.32691	23.5802	33.0559	27.4798	14.5822	9.16007	42.512	33.0811	29.7262	6.91321
						2019-12-31	Raw data
							Viral dose (uL)	Empty		Human		Stop		G330E		R332E		R332P		G333D		G333Y		R335A		R335E		Q337D		Q337N
							12.5	17.9*	0*	95.1*	95.7*	94.3*	93.1*	70.5*	69.9*	59.2*	56*	44.1	100*	50	48.2	79.5*	82.6*	60.2*	60.4*	44.4	47.7	62.8*	61.4*	91.8*	93.3*
							6.25	93.2*	96.7*	91.7*	92.7*	95.2*	94.8*	48.7	46.8	36.8	27.7	29.7	29.5	27.4	24.7	65.1*	64.2*	35	34.9	31.2	24.7	42.6	38.8	82*	84.3*
							3.125	90.8*	90.2*	78.4*	79.9*	89.2*	88.4*	29.1	29.7	20.7	19.6	14.9	17.1	17.9	13.1	38.2	44.5	20	19.4	16.6	15.1	23.9	21.2	58*	66.3*
							1.5625	81.2*	79.2*	68.2*	66.9*	74.7*	80*	17.8	19.6	11.4	11.5	9.87	12	8.5	8.16	23.2	26.2	11.6	12.2	8.09	7.3	15.4	14.5	45.4	45
							0.78125	64.2*	65*	49.2	48	60.6*	58.5*	9.21	8.85	6.9	6.32	4.39	5.63	5.51	3.83	15.1	14.1	5.88	5.97	4.99	5.34	7.97	7.07	26.2	28.5
							0.390625	55.5	50.2	35.5	36	40.3	43.5	6.17	6.19	2.92	3.22	2.32	3.22	2.94	2.67	6.88	7.5	3.3	3.23	2.15	3.1	5.01	4.08	17.1	19.5
							0.195312	37.8	32.9	23.9	22.2	24.7	28.8	2.83	3.3	1.87	1.74	1.43	2.07	1.58	1.32	4.07	4.5	1.98	2.07	1.22	1.24	2.26	2.11	9.97	10.5
							0.0976562	15.6	15.1	8.39	8.1	10.8	11.8	1.22	0.74	0.82	0.63	0.59	0.62	0.65	0.56	1.6	1.49	0.55*	0.64*	0.69	0.6	0.99*	0.71*	3.96	4.45
							Log-transformed data
							Viral dose (uL)	Empty		Human		Stop		G330E		R332E		R332P		G333D		G333Y		R335A		R335E		Q337D		Q337N
							1.09691											1.64444		1.69897	1.68305					1.64738	1.67852
							0.79588							1.68753	1.67025	1.56585	1.44248	1.47276	1.46982	1.43775	1.3927			1.54407	1.54283	1.49415	1.3927	1.62941	1.58883
							0.49485							1.46389	1.47276	1.31597	1.29226	1.17319	1.233	1.25285	1.11727	1.58206	1.64836	1.30103	1.2878	1.22011	1.17898	1.3784	1.32634
							0.19382							1.25042	1.29226	1.0569	1.0607	0.994317	1.07918	0.929419	0.91169	1.36549	1.4183	1.06446	1.08636	0.907949	0.863323	1.18752	1.16137	1.65706	1.65321
							-0.10721			1.69197	1.68124			0.96426	0.946943	0.838849	0.800717	0.642465	0.750508	0.741152	0.583199	1.17898	1.14922	0.769377	0.775974	0.698101	0.727541	0.901458	0.849419	1.4183	1.45484
							-0.40824	1.74429	1.7007	1.55023	1.5563	1.60531	1.63849	0.790285	0.791691	0.465383	0.507856	0.365488	0.507856	0.468347	0.426511	0.837588	0.875061	0.518514	0.509203	0.332438	0.491362	0.699838	0.61066	1.233	1.29003
							-0.70927	1.57749	1.5172	1.3784	1.34635	1.3927	1.45939	0.451786	0.518514	0.271842	0.240549	0.155336	0.31597	0.198657	0.120574	0.609594	0.653213	0.296665	0.31597	0.0863598	0.0934217	0.354108	0.324282	0.998695	1.02119
							-1.0103	1.19312	1.17898	0.923762	0.908485	1.03342	1.07188	0.0863598	-0.130768	-0.0861861	-0.200659	-0.229148	-0.207608	-0.187087	-0.251812	0.20412	0.173186			-0.161151	-0.221849			0.597695	0.64836
							Linear regression
								Empty	Human	Stop	G330E	R332E	R332P	G333D	G333Y	R335A	R335E	Q337D	Q337N
							Best-fit values
							Slope	0.891	0.8313	0.9455	0.8957	0.9029	0.8783	0.8749	0.9227	0.8381	0.8813	0.8295	0.8274
							Y-intercept	2.117	1.844	2.037	1.043	0.852	0.7815	0.7448	1.212	0.8814	0.7387	0.965	1.535
							log(x) for log(y) = 1	-1.25365	-1.01528	-1.09677	-0.0480071	0.163916	0.248776	0.29169	-0.22976	0.141511	0.296494	0.0421941	-0.646604
							x when y = 10	0.0557638	0.0965434	0.080025	0.89535	1.45853	1.77327	1.95745	0.589168	1.38519	1.97922	1.10203	0.22563
							fold inhibition	0.999351	1.73017	1.43414	16.0457	26.1386	31.7791	35.0797	10.5586	24.8243	35.4699	19.7497	4.04354
								Empty	Human	Stop	G330E	R332E	R332P	G333D	G333Y	R335A	R335E	Q337D	Q337N
								0.999969	1.97705	0.945872	15.9441	23.6437	21.9468	14.1595	7.64551	32.9809	25.6034	23.9826	4.92039
								0.999793	2.49196	1.32691	23.5802	33.0559	27.4798	14.5822	9.16007	42.512	33.0811	29.7262	6.91321
								0.999351	1.73017	1.43414	16.0457	26.1386	31.7791	35.0797	10.5586	24.8243	35.4699	19.7497	4.04354

## Sheet: HIV-2
	HIV-2 fold restriction
Human TRIM5 variant	2020-01-06	2020-01-22	2020-01-23	Average		2020-01-06	Raw data
WT	0.47065	1.20803	1.80626	1.16165			Viral dose (uL)	Empty	Human	Stop	G330E	R332E	R332P	G333D	G333Y	R335A	R335E	Q337D	Q337N
R332P	12.8626	43.5824	33.5373	29.9941			6.25	0*	52.1*	55.2*	12.4*	6.62	5.22	10.7	39.9*	5.41	11	15.4	9.24
R335A	12.3187	103.41	139.433	85.0539			2.08333	21.6	28.5*	35.4*	6.78	2.29	2.1	4.46	18.5	1.98	4.83	6.47	3.87
R332E	9.32671	40.1316	36.7895	28.7493			0.694444	6.83	13.1	17.1	2.31	0.9	0.6	2.26	5.33	0.66	1.84	2.73	1.24
R335E	3.95534	5.10821	9.92931	6.33095			0.231481	2.65	4.49	6.73	0.82	0.25*	0.32*	0.87	1.83	0.21*	0.71	1.2	0.41
G330E	3.34793	25.9542	6.23756	11.8466			0.0771605	0.91	1.84	2.49	0.34*	0.071*	0.096*	0.22*	0.51	0.074*	0.27*	0.26*	0.17*
G333D	3.07441	10.0486	6.6001	6.57438
Q337D	2.17367	13.5769	9.09778	8.28278			Log-transformed data
G333Y	1.64137	4.34812	3.93147	3.30699			Viral dose (uL)	Empty	Human	Stop	G330E	R332E	R332P	G333D	G333Y	R335A	R335E	Q337D	Q337N
Q337N	6.57218	11.8332	18.8735	12.4263			0.79588					0.820858	0.717671	1.02938		0.733197	1.04139	1.18752	0.965672
Stop	0.315037	2.9812	1.4081	1.56811			0.318759	1.33445			0.83123	0.359835	0.322219	0.649335	1.26717	0.296665	0.683947	0.810904	0.587711
							-0.158362	0.834421	1.11727	1.233	0.363612	-0.0457575	-0.221849	0.354108	0.726727	-0.180456	0.264818	0.436163	0.0934217
							-0.635484	0.423246	0.652246	0.828015	-0.0861861			-0.0604807	0.262451		-0.148742	0.0791812	-0.387216
							-1.11261	-0.0409586	0.264818	0.396199					-0.29243
							Linear regression
								Empty	Human	Stop	G330E	R332E	R332P	G333D	G333Y	R335A	R335E	Q337D	Q337N
							Best-fit values
							Slope	0.951	0.8933	0.8769	0.9614	0.9082	0.9846	0.7472	1.078	0.9575	0.8362	0.7754	0.9543
							Y-intercept	1.015	1.246	1.376	0.5218	0.08882	-0.04116	0.4332	0.9188	-0.02206	0.3933	0.5663	0.2384
							log(x) for log(y) = 0	-1.0673	-1.39483	-1.56916	-0.54275	-0.0977978	0.0418038	-0.579764	-0.852319	0.0230392	-0.470342	-0.730333	-0.249817
							x when y = 1	0.0856451	0.0402876	0.0269672	0.286583	0.798366	1.10104	0.263169	0.140501	1.05448	0.338577	0.186066	0.562579
							fold inhibition	1.00053	0.47065	0.315037	3.34793	9.32671	12.8626	3.07441	1.64137	12.3187	3.95534	2.17367	6.57218
						2020-01-22	Raw data
							Viral dose (uL)	Empty	Human	Stop	G330E	R332E	R332P	G333D	G333Y	R335A	R335E	Q337D	Q337N
							25	0.57*	26.6*	18*	4.89	3.95	3.68*	4.28*	7.73*	3.78	4.52*	3.47*	6.67*
							8.33333	33.4*	37.8*	20.6*	4.51	2.01	2.7	4.31*	9.38*	1.31	3.57*	5.42	2.92*
							2.77778	21.5	24.1*	14.7*	2	0.93	0.78	3.06	7.6	0.31	3.05	2.38	2.82
							0.92593	11.4	11.2	8.71	0.58	0.4	0.35	1.35	2.64	0.2*	1.69	1.48	1.25
							0.30864	3.9	4.7	2.64	0.17*	0.12*	0.11*	0.47	1.21	0.22*	0.91	0.29	0.37
							0.10288	1.41	1.23	0.56	0.18*	0.045*	0.047*	0.18*	0.32	0.21*	0.24*	0*	0.5*
							0.03429	0.48	0.49	0.1*	0.047*	0.043*	0.036*	0.093*	0.069*	0.07*	0*	0.19*	0*
							Log-transformed data
							Viral dose (uL)	Empty	Human	Stop	G330E	R332E	R332P	G333D	G333Y	R335A	R335E	Q337D	Q337N
							1.39794				0.689309	0.596597				0.577492
							0.920819				0.654177	0.303196	0.431364			0.117271		0.733999
							0.443698	1.33244			0.30103	-0.0315171	-0.107905	0.485721	0.880814	-0.508638	0.4843	0.376577	0.450249
							-0.0334218	1.0569	1.04922	0.940018	-0.236572	-0.39794	-0.455932	0.130334	0.421604		0.227887	0.170262	0.09691
							-0.510548	0.591065	0.672098	0.421604				-0.327902	0.0827854		-0.0409586	-0.537602	-0.431798
							-0.987669	0.149219	0.0899051	-0.251812					-0.49485
							-1.46483	-0.318759	-0.309804
							Linear regression
								Empty	Human	Stop	G330E	R332E	R332P	G333D	G333Y	R335A	R335E	Q337D	Q337N
							Best-fit values
							Slope	0.8824	0.9765	1.249	0.6562	0.6955	0.9298	0.8526	0.936	1.138	0.5504	0.8428	0.9243
							Y-intercept	1.013	1.041	0.8415	-0.1746	-0.3167	-0.4567	0.1245	0.4772	-0.986	0.2421	0.01292	0.06935
							log(x) for log(y) = 0	-1.14801	-1.06605	-0.673739	0.266077	0.455356	0.491181	-0.146024	-0.509829	0.866432	-0.439862	-0.0153299	-0.0750298
							x when y = 1	0.0711205	0.085891	0.211963	1.84534	2.85336	3.09871	0.714457	0.309151	7.35245	0.363194	0.965317	0.841338
							fold inhibition	1.00029	1.20803	2.9812	25.9542	40.1316	43.5824	10.0486	4.34812	103.41	5.10821	13.5769	11.8332
						2020-01-23	Raw data
							Viral dose (uL)	Empty	Human	Stop	G330E	R332E	R332P	G333D	G333Y	R335A	R335E	Q337D	Q337N
							25	21.8*	32*	17.7*	3.95*	1.91*	3.08	0*	6.56*	1.28	4.7*	6.39*	4.86*
							8.33333	30.1*	38.5*	20.7*	2.98*	2.15	0*	5.36	9.34*	1.02	4.9*	3.59*	2.75*
							2.77778	20.7*	22*	15.3*	2.5*	1.1	0.67	1.62	7.79	0.26	3.22	3.8	1.76
							0.92593	9.83	8.62	7.26	2.11	0.17	2.44*	1.32	2.8	0.45*	1	1.92	0.36
							0.30864	4.75	2.5	1.84	0.27	1.68*	0.38	0.7	0.75	0.33*	0.26	0.16	0.22
							0.10288	1.4	0.44	1.2	0.12	0.071*	0*	0*	0.46*	0*	0.27*	0*	0.28*
							0.03429	0.23	0.77*	0.18	0.59*	0.27*	0.048*	0*	0.24*	0*	0.16*	0.12*	0*
							Log-transformed data
							Viral dose (uL)	Empty	Human	Stop	G330E	R332E	R332P	G333D	G333Y	R335A	R335E	Q337D	Q337N
							1.39794						0.488551			0.10721
							0.920819					0.332438		0.729165		0.00860017
							0.443698					0.0413927	-0.173925	0.209515	0.891537	-0.585027	0.507856	0.579784	0.245513
							-0.0334218	0.992554	0.935507	0.860937	0.324282	-0.769551		0.120574	0.447158		0	0.283301	-0.443697
							-0.510548	0.676694	0.39794	0.264818	-0.568636		-0.420216	-0.154902	-0.124939		-0.585027	-0.79588	-0.657577
							-0.987669	0.146128	-0.356547	0.0791812	-0.920819
							-1.46483	-0.638272		-0.744727
							Linear regression
								Empty	Human	Stop	G330E	R332E	R332P	G333D	G333Y	R335A	R335E	Q337D	Q337N
							Best-fit values
							Slope	1.137	1.354	1.048	1.305	1.155	0.4762	0.5745	1.065	0.7254	1.145	1.442	0.9464
							Y-intercept	1.146	1.017	0.9005	0.2778	-0.6443	-0.2465	0.1082	0.4402	-0.8244	0.01256	0.07059	-0.2536
							log(x) for log(y) = 0	-1.00792	-0.751108	-0.859256	-0.212874	0.557835	0.51764	-0.188338	-0.413333	1.13648	-0.0109694	-0.0489528	0.267963
							x when y = 1	0.0981939	0.177375	0.138275	0.612529	3.61273	3.29336	0.64813	0.386071	13.6923	0.975058	0.893402	1.85337
							fold inhibition	0.999938	1.80626	1.4081	6.23756	36.7895	33.5373	6.6001	3.93147	139.433	9.92931	9.09778	18.8735

## Sheet: SIVmac
	SIVmac fold restriction					2020-01-06	Raw data
Human TRIM5 variant	2020-01-06	2020-01-22	2020-01-23	Average			Viral dose (uL)	Empty	Human	Stop	G330E	R332E	R332P	G333D	G333Y	R335A	R335E	Q337D	Q337N
WT	1.10375	2.4	1.36692	1.62356			6.25	93.2*	97.1*	97.2*	95.8*	97.5*	14.1	97.2*	97.3*	42	97.1*	97.9*	88.1*
R332P	47.5659	50.97	50.414	49.65			2.08333	70.7*	76.7*	76.5*	77.3*	78*	3.82	73.5*	80.9*	18	77.3*	81*	52.7*
R335A	10.5176	28.37	13.085	17.3242			0.694444	41.7	43.6	47.5	47.5	42.1	1.88	42	39.6	7.45	48.8	48.5	21.9
R332E	0.962387	2.87	1.39658	1.74299			0.231481	19	18.2	21.4	21.2	19.2	0.74	18.7	20.8	2.51	20.8	21.4	9.05
R335E	0.843354	2.8	2.02033	1.8879			0.0771605	7.89	7.2	7.74	8.21	8.19	0.34*	7.75	8.28	1.26*	9.16	9.55	3.92
G330E	0.929502	5.96	4.05311	3.64754			0.0257202	4.71*	4.52*	5.72*	6.77*	5.59*	0.072*	5.88*	6.03*	0.73*	6.47*	6.51*	2.14*
G333D	1.02502	2.5	2.17293	1.89932			0.00857339	8.97*	3.03*	3.59*	5.3*	4.76*	0.14*	4.96*	4.39*	0.62*	5.75*	7.22*	3.35*
Q337D	0.797131	2.41	1.55483	1.58732			0.0028578	8.96*	2.75*	4.59*	6.71*	6.02*	0.26*	6.89*	7.06*	1.14*	10.3*	10.6*	4.37*
G333Y	0.911269	3.13	2.30939	2.11689
Q337N	2.49539	5.4	2.50833	3.46791			Log-transformed data
V340stop	0.975371	3.67	1.58001	2.07513			Viral dose (uL)	Empty	Human	Stop	G330E	R332E	R332P	G333D	G333Y	R335A	R335E	Q337D	Q337N
							0.79588						1.14922			1.62325
							0.318759						0.582063			1.25527
							-0.158362	1.62014	1.63949	1.67669	1.67669	1.62428	0.274158	1.62325	1.5977	0.872156	1.68842	1.68574	1.34044
							-0.635484	1.27875	1.26007	1.33041	1.32634	1.2833	-0.130768	1.27184	1.31806	0.399674	1.31806	1.33041	0.956649
							-1.11261	0.897077	0.857332	0.888741	0.914343	0.913284		0.889302	0.91803		0.961895	0.980003	0.593286
							-1.58973
							-2.06685
							Linear regression
								Empty	Human	Stop	G330E	R332E	R332P	G333D	G333Y	R335A	R335E	Q337D	Q337N
							Best-fit values
							Slope	0.7577	0.8197	0.8257	0.7989	0.7451	0.8694	0.7691	0.7123	0.8496	0.7614	0.7396	0.783
							Y-intercept	1.747	1.773	1.823	1.813	1.747	0.3989	1.75	1.731	0.9694	1.807	1.802	1.461
							log(x) for log(y) = 1	-0.985878	-0.943028	-0.99673	-1.01765	-1.00255	0.691396	-0.975166	-1.02625	0.0360169	-1.05989	-1.08437	-0.588761
							x when y = 10	0.103305	0.114018	0.100756	0.0960176	0.0994146	4.91356	0.105885	0.0941341	1.08647	0.0871185	0.0823436	0.257774
							fold inhibition	1.00005	1.10375	0.975371	0.929502	0.962387	47.5659	1.02502	0.911269	10.5176	0.843354	0.797131	2.49539
						2020-01-22	Raw data
							Viral dose (uL)	Empty	Human	Stop	G330E	R332E	R332P	G333D	G333Y	R335A	R335E	Q337D	Q337N
							4.16667	80.6*	71.7*	64.5*	48.6	79.4*	5.02	73.2*	100*	11.9	76.5*	70.9*	47.4*
							2.77778	69.7*	58.4*	53.8*	35.1	58.9*	3.22	59.6*	57.3*	9.22	64.9*	66.9*	37.4
							1.85185	50.3*	47	39.9	24.3	43.5	1.97	38.2*	43.2	6.68	53.3*	55.3*	18.2
							1.23457	41.8	33.8	27.5	17.6	30.3	0.5	33	28.3	5.25	39.1	34	20.8
							0.82305	30.4	23.3	19.2	13.1	24.1	0.65*	25.1	21.3	4.8	26.5	24.8	14.8
							0.5487	26.3	17.7	13.7	7.9	16.4	0.62*	21.7	14.4	1.98	17.5	0*	8.72
							0.3658	20.2	13.1	9.25	6.1	10.4	0.74*	11.4	11.2	1.5*	12.2	13.1	7.39*
							0.24387	0*	9.82	9.09*	4.68	8.64	0.37*	10.6*	7.65	1.69*	0*	12.9*	2.31*
							Log-transformed data
							Viral dose (uL)	Empty	Human	Stop	G330E	R332E	R332P	G333D	G333Y	R335A	R335E	Q337D	Q337N
							0.619789				1.68664		0.700704			1.07555
							0.443698				1.54531		0.507856			0.964731			1.57287
							0.267606		1.6721	1.60097	1.38561	1.63849	0.294466		1.63548	0.824776			1.26007
							0.0915157	1.62118	1.52892	1.43933	1.24551	1.48144	-0.30103	1.51851	1.45179	0.720159	1.59218	1.53148	1.31806
							-0.0845738	1.48287	1.36736	1.2833	1.11727	1.38202		1.39967	1.32838	0.681241	1.42325	1.39445	1.17026
							-0.260665	1.41996	1.24797	1.13672	0.897627	1.21484		1.33646	1.15836	0.296665	1.24304		0.940516
							-0.436756	1.30535	1.11727	0.966142	0.78533	1.01703		1.0569	1.04922		1.08636	1.11727
							-0.612842		0.992111		0.670246	0.936514			0.883661
							Linear regression
								Empty	Human	Stop	G330E	R332E	R332P	G333D	G333Y	R335A	R335E	Q337D	Q337N
							Best-fit values
							Slope	0.5738	0.7714	0.8929	0.8455	0.8227	1.828	0.8223	0.8335	0.7869	0.9641	0.7845	0.7692
							Y-intercept	1.556	1.454	1.361	1.164	1.42	-0.3496	1.47	1.395	0.6192	1.503	1.46	1.182
							log(x) for log(y) = 1	-0.968979	-0.58854	-0.404301	-0.193968	-0.510514	0.738293	-0.571568	-0.473905	0.483924	-0.52173	-0.586361	-0.236609
							x when y = 10	0.107404	0.257905	0.394184	0.639782	0.308664	5.47385	0.268184	0.335811	3.04736	0.300794	0.259203	0.57995
							fold inhibition	1.00004	2.40135	3.67025	5.957	2.87397	50.967	2.49706	3.12673	28.374	2.80069	2.41343	5.39991
						2020-01-23	Raw data
							Viral dose (uL)	Empty	Human	Stop	G330E	R332E	R332P	G333D	G333Y	R335A	R335E	Q337D	Q337N
							4.16667	83.4*	72.1*	66.2*	43.1	71.7*	4.44	70.6*	77.5*	14.2	78.2*	70.8*	41.3*
							2.77778	69*	58*	49.6	31.1	57.8*	1.87	51*	49.1	11.1	69.2*	61.8*	44.6
							1.85185	49.9	44.5	39.5	21.6	44.1	1.25	39.4	38	5.61	47.6	44.5	22.4
							1.23457	36.8	32	27	14.6	33.5	1.26*	22.2	30.2	5.69*	32.8	32.4	18.2
							0.82305	27.9	20.9	19.8	13	0*	0.64	19.9	16.1	4.75	23.2	19	16.1
							0.5487	22.4	16.9	13.8	6.86	18.8	0.48*	15.6	16.7*	3.24	16.9	15	10.2
							0.3658	14	13.1	12.2	4.97	13.2	0.072*	7.86	8.67	1.67	9.03	11.2	7.87
							0.24387	11.7	8.9	7.9	2.47	7.88	0.28*	5.13	4.75	1.1	4.71	8.68	5.71
							Log-transformed data
							Viral dose (uL)	Empty	Human	Stop	G330E	R332E	R332P	G333D	G333Y	R335A	R335E	Q337D	Q337N
							0.619789				1.63448		0.647383			1.15229
							0.443698			1.69548	1.49276		0.271842		1.69108	1.04532			1.64933
							0.267606	1.6981	1.64836	1.5966	1.33445	1.64444	0.09691	1.5955	1.57978	0.748963	1.67761	1.64836	1.35025
							0.0915157	1.56585	1.50515	1.43136	1.16435	1.52504		1.34635	1.48001		1.51587	1.51055	1.26007
							-0.0845738	1.4456	1.32015	1.29667	1.11394		-0.19382	1.29885	1.20683	0.676694	1.36549	1.27875	1.20683
							-0.260665	1.35025	1.22789	1.13988	0.836324	1.27416		1.19312		0.510545	1.22789	1.17609	1.0086
							-0.436756	1.14613	1.11727	1.08636	0.696356	1.12057		0.895423	0.938019	0.222716	0.955688	1.04922	0.895975
							-0.612842	1.06819	0.94939	0.897627	0.392697	0.896526		0.710117	0.676694	0.0413927	0.673021	0.93852	0.756636
							Linear regression
								Empty	Human	Stop	G330E	R332E	R332P	G333D	G333Y	R335A	R335E	Q337D	Q337N
							Best-fit values
							Slope	0.7308	0.7708	0.7515	0.9613	0.8206	1.135	0.9549	0.9618	0.8547	1.11	0.8171	0.7784
							Y-intercept	1.505	1.428	1.37	1.08	1.448	-0.1481	1.338	1.315	0.6361	1.428	1.408	1.227
							log(x) for log(y) = 1	-0.691024	-0.555267	-0.492349	-0.0832206	-0.545942	1.01154	-0.353964	-0.327511	0.425763	-0.385586	-0.499327	-0.291624
							x when y = 10	0.203693	0.278441	0.321848	0.825618	0.284484	10.2693	0.442625	0.470424	2.66541	0.411542	0.316718	0.510947
							fold inhibition	0.999966	1.36692	1.58001	4.05311	1.39658	50.414	2.17293	2.30939	13.085	2.02033	1.55483	2.50833
							Empty	Human	Stop	G330E	R332E	R332P	G333D	G333Y	R335A	R335E	Q337D	Q337N
							1.00005	1.10375	0.975371	0.929502	0.962387	47.5659	1.02502	0.911269	10.5176	0.843354	0.797131	2.49539
							1	2.4	3.67	5.96	2.87	50.97	2.5	3.13	28.37	2.8	2.41	5.4
							0.999966	1.36692	1.58001	4.05311	1.39658	50.414	2.17293	2.30939	13.085	2.02033	1.55483	2.50833
