# Supplementary material for: Mutational resilience of antiviral restriction favors primate TRIM5α in host-virus evolutionary arms races
Source: eLife. 2020 Sep 15;9:e59988. doi: 10.7554/eLife.59988 (PMC7492085; doi:10.7554/eLife.59988)
Supplement: Figure 4—source data 3. [file elife-59988-fig4-data3.xlsx]

## Sheet: R332P-HIV-LOF_Replicates_Fig4CD
dist_codon	seq_aa	mutcod_index	mut_aa	num_nt_seqs	enrichA_Avg	enrichB_Avg	enrich_Avg_RepAndAA	enrich_SD_RepAndAA	Rank	WT Avg	WT SD
1	GAPGARYQTFV	334	A	2	1.62216	1.82835	1.72526	1.1987	17
1	AAPGTRYQTFV	330	A	2	0.745949	0.841714	0.793831	0.0900472	106
1	GAPGTRAQTFV	336	A	2	0.76821	0.797713	0.782962	0.101445	112
1	GAPGTRYQAFV	338	A	2	0.787916	0.73683	0.762373	0.179438	120
1	GAPGTRYQTAV	339	A	2	0.68894	0.706983	0.697961	0.103773	138
1	GAPATRYQTFV	333	A	2	0.585763	0.701673	0.643718	0.470744	152
1	GAPGTRYATFV	337	A	2	0.523297	0.736878	0.630088	0.179609	158
1	GAPGTRYQTFA	340	A	2	0.600889	0.435051	0.51797	0.127462	180
1	GAPGTAYQTFV	335	A	2	0.513362	0.477005	0.495183	0.162714	187
1	CAPGTRYQTFV	330	C	1	1.02211	1.07942	1.05076	0.0405251	64
1	GAPGCRYQTFV	334	C	1	1.09284	0.851583	0.972211	0.170593	73
1	GAPGTRYQCFV	338	C	1	0.853018	0.778288	0.815653	0.0528422	99
1	GAPGTRCQTFV	336	C	1	0.708877	0.895497	0.802187	0.131961	103
1	GAPGTRYCTFV	337	C	1	0.621297	0.96378	0.792539	0.242173	108
1	GAPCTRYQTFV	333	C	1	0.986189	0.577697	0.781943	0.288848	113
1	GCPGTRYQTFV	331	C	1	0.815795	0.553469	0.684632	0.185493	140
1	GAPGTRYQTCV	339	C	1	0.59519	0.637331	0.61626	0.0297978	162
1	GAPGTRYQTFC	340	C	1	0.698788	0.480638	0.589713	0.154255	166
1	GAPGTCYQTFV	335	C	1	0.459325	0.707563	0.583444	0.17553	169
1	GAPGTRYQTDV	339	D	1	1.31307	1.35534	1.3342	0.0298894	36
1	GAPGTRDQTFV	336	D	1	0.616301	1.21764	0.916968	0.425208	82
1	GAPGTRYQTFD	340	D	1	0.624869	0.995637	0.810253	0.262173	101
1	GAPGDRYQTFV	334	D	1	0.755118	0.750626	0.752872	0.00317593	123
1	GAPGTRYQDFV	338	D	1	0.607336	0.662697	0.635016	0.0391466	156
1	DAPGTRYQTFV	330	D	1	0.714692	0.545636	0.630164	0.119541	157
1	GDPGTRYQTFV	331	D	1	0.589929	0.653561	0.621745	0.0449945	160
1	GAPGTDYQTFV	335	D	1	0.535071	0.340814	0.437943	0.13736	191
1	GAPGTRYDTFV	337	D	1	0.388118	0.36654	0.377329	0.0152585	195
1	GAPDTRYQTFV	333	D	1	0.22356	0.110893	0.167226	0.0796671	200
1	GAPGTREQTFV	336	E	1	1.57616	1.44211	1.50914	0.0947917	28
1	GAPGTRYQTEV	339	E	1	1.20287	0.913216	1.05804	0.204814	62
1	GAPGTEYQTFV	335	E	1	0.794926	0.884122	0.839524	0.0630716	96
1	GAPGTRYQTFE	340	E	1	0.685297	0.801916	0.743606	0.0824621	127
1	GEPGTRYQTFV	331	E	1	0.739308	0.711054	0.725181	0.0199786	132
1	GAPGERYQTFV	334	E	1	0.703642	0.576361	0.640002	0.0900019	154
1	GAPGTRYETFV	337	E	1	0.531574	0.706658	0.619116	0.123803	161
1	GAPETRYQTFV	333	E	1	0.710294	0.459068	0.584681	0.177644	168
1	EAPGTRYQTFV	330	E	1	0.615145	0.534999	0.575072	0.0566719	171
1	GAPGTRYQEFV	338	E	1	0.633535	0.456204	0.544869	0.125392	177
1	GAPGTRYQFFV	338	F	1	1.7699	1.93608	1.85299	0.117507	15
1	GAPGFRYQTFV	334	F	1	1.68427	1.27533	1.4798	0.289161	30
1	GAPGTRYFTFV	337	F	1	0.909206	0.835112	0.872159	0.0523924	88
1	GAPGTRYQTFF	340	F	1	0.703963	0.689665	0.696814	0.01011	139
1	GAPGTRFQTFV	336	F	1	0.630638	0.732404	0.681521	0.0719595	142
1	GAPGTFYQTFV	335	F	1	0.39446	0.961885	0.678172	0.40123	143
1	GFPGTRYQTFV	331	F	1	0.657913	0.3537	0.505806	0.215111	183
1	GGPGTRYQTFV	331	G	2	1.13916	1.12685	1.13301	0.105565	54
1	GAPGTRGQTFV	336	G	2	0.926885	1.00926	0.968075	0.170106	75
1	GAPGGRYQTFV	334	G	2	0.892752	0.788883	0.840817	0.143399	95
1	GAPGTRYQTFG	340	G	2	0.814497	0.810509	0.812503	0.0883149	100
1	GAPGTRYGTFV	337	G	2	0.802219	0.795124	0.798672	0.0973615	105
1	GAPGTRYQTGV	339	G	2	0.737967	0.698933	0.71845	0.0251009	134
1	GAPGTRYQGFV	338	G	2	0.562624	0.56616	0.564392	0.096339	174
1	GAPGTGYQTFV	335	G	2	0.568629	0.532972	0.550801	0.0549537	176
1	GAPGHRYQTFV	334	H	1	0.79276	1.39418	1.09347	0.425267	57
1	GAPGTRYQTFH	340	H	1	1.1899	0.726237	0.958069	0.32786	77
1	GAPGTRYQTHV	339	H	1	0.690507	0.909098	0.799803	0.154568	104
1	GAPGTRYQHFV	338	H	1	0.939143	0.648487	0.793815	0.205525	107
1	GAPGTRHQTFV	336	H	1	0.621317	0.652341	0.636829	0.0219376	155
1	GAPGTRYHTFV	337	H	1	0.312266	0.685331	0.498799	0.263797	185
1	HAPGTRYQTFV	330	H	1	0.50826	0.416085	0.462172	0.065178	190
1	GHPGTRYQTFV	331	H	1	0.330823	0.457405	0.394114	0.0895068	194
1	GAPGTHYQTFV	335	H	1	0.397255	0.152441	0.274848	0.17311	199
1	IAPGTRYQTFV	330	I	1	2.49079	3.90628	3.19853	1.00091	9
1	GAPGTRYQIFV	338	I	1	3.05968	3.0932	3.07644	0.0237029	10
1	GAPGTRYITFV	337	I	1	2.64059	1.75645	2.19852	0.625184	12
1	GAPGTRYQTFI	340	I	1	1.07759	1.35404	1.21581	0.195476	48
1	GAPGTRIQTFV	336	I	1	1.71913	0.696526	1.20783	0.723092	50
1	GAPGIRYQTFV	334	I	1	0.726978	1.60466	1.16582	0.620613	52
1	GAPGTRYQTIV	339	I	1	0.602881	0.73576	0.669321	0.0939594	147
1	GAPGTIYQTFV	335	I	1	0.234859	0.494565	0.364712	0.18364	196
1	KAPGTRYQTFV	330	K	1	1.88455	2.04699	1.96577	0.114859	13
1	GAPGTRKQTFV	336	K	1	1.75733	1.57521	1.66627	0.128779	23
1	GAPGTRYQTKV	339	K	1	1.51681	1.54852	1.53267	0.0224248	26
1	GAPGTRYQTFK	340	K	1	1.24701	1.50313	1.37507	0.181106	34
1	GAPGTRYKTFV	337	K	1	0.993226	1.31025	1.15174	0.224172	53
1	GAPGTRYQKFV	338	K	1	1.08882	1.08457	1.08669	0.00300164	58
1	GKPGTRYQTFV	331	K	1	0.819298	1.15711	0.988205	0.23887	71
1	GAPGKRYQTFV	334	K	1	0.644165	1.14268	0.893423	0.352504	84
1	GAPKTRYQTFV	333	K	1	0.838905	0.582921	0.710913	0.181008	136
1	GAPGTKYQTFV	335	K	1	0.612385	0.56323	0.587808	0.0347573	167
1	GAPGTRYQLFV	338	L	3	1.58852	1.8181	1.70331	0.339775	19
1	GAPGTRYQTFL	340	L	3	1.11109	1.43718	1.27413	0.661373	42
1	GAPGTRYLTFV	337	L	3	1.3757	1.0671	1.2214	0.303559	47
1	GLPGTRYQTFV	331	L	2	0.910585	1.12318	1.01688	0.535582	69
1	LAPGTRYQTFV	330	L	2	1.10966	0.851064	0.980364	0.177026	72
1	GAPGLRYQTFV	334	L	3	1.00612	0.742062	0.874089	0.244087	87
1	GAPGTRLQTFV	336	L	3	1.01728	0.707274	0.862279	0.288863	92
1	GAPLTRYQTFV	333	L	2	0.723627	0.696441	0.710034	0.22131	137
1	GAPGTRYQTLV	339	L	3	0.771635	0.594843	0.683239	0.143346	141
1	GAPGTLYQTFV	335	L	3	0.46184	0.468317	0.465079	0.0843501	189
1	GAPMTRYQTFV	333	M	1	1.10886	1.81802	1.46344	0.501456	31
1	GAPGTRYMTFV	337	M	1	1.47596	1.18398	1.32997	0.20646	37
1	GAPGTRMQTFV	336	M	1	1.07864	1.48965	1.28414	0.290631	40
1	MAPGTRYQTFV	330	M	1	1.43022	0.932055	1.18114	0.352255	51
1	GAPGTRYQMFV	338	M	1	1.22605	0.974588	1.10032	0.177812	56
1	GAPGMRYQTFV	334	M	1	1.07054	1.03862	1.05458	0.022573	63
1	GAPGTRYQTFM	340	M	1	0.869592	0.972049	0.920821	0.0724478	80
1	GAPGTRYQTMV	339	M	1	0.846315	0.965847	0.906081	0.0845212	83
1	GMPGTRYQTFV	331	M	1	0.782768	0.797342	0.790055	0.0103058	109
1	GAPGTMYQTFV	335	M	1	0.724317	0.504737	0.614527	0.155266	163
1	GNPGTRYQTFV	331	N	1	2.14855	1.73864	1.94359	0.289851	14
1	GAPGTRYNTFV	337	N	1	0.82258	1.23406	1.02832	0.290958	66
1	GAPGNRYQTFV	334	N	1	0.955686	1.05748	1.00658	0.0719789	70
1	GAPGTRYQTNV	339	N	1	0.936904	0.898207	0.917555	0.0273633	81
1	GAPGTRYQTFN	340	N	1	0.798205	0.724061	0.761133	0.0524276	121
1	GAPGTRYQNFV	338	N	1	0.670075	0.810294	0.740184	0.0991495	128
1	GAPGTNYQTFV	335	N	1	0.112459	0.499648	0.306053	0.273783	197
1	GAPPTRYQTFV	333	P	1	1.77527	1.05351	1.41439	0.510363	33
1	GAPGTRYQTPV	339	P	2	1.36031	1.11068	1.2355	0.269143	45
1	GAPGTRYPTFV	337	P	2	1.02923	1.01053	1.01988	0.250075	68
1	GAPGTRPQTFV	336	P	1	0.520458	1.21574	0.868098	0.491637	90
1	GAPGTRYQPFV	338	P	2	0.889547	0.652254	0.7709	0.228517	116
1	GAPGTRYQTFP	340	P	2	0.503287	0.987442	0.745365	0.455263	126
1	GPPGTRYQTFV	331	P	2	0.740195	0.722571	0.731383	0.233605	130
1	PAPGTRYQTFV	330	P	1	0.6025	0.730509	0.666504	0.0905163	148
1	GAPGPRYQTFV	334	P	2	0.560568	0.746687	0.653628	0.157477	151
1	GAPGTPYQTFV	335	P	2	0.521513	0.485473	0.503493	0.153229	184
1	GAPGTRYQTQV	339	Q	1	0.794447	0.874414	0.834431	0.0565452	97
1	GAPGQRYQTFV	334	Q	1	0.762314	0.578117	0.670215	0.130247	146
1	GAPGTRYQTFQ	340	Q	1	0.543393	0.742787	0.64309	0.140993	153
1	GAPGTRYQQFV	338	Q	1	0.578518	0.607292	0.592905	0.0203457	165
1	QAPGTRYQTFV	330	Q	1	0.525855	0.600762	0.563309	0.0529672	175
1	GQPGTRYQTFV	331	Q	1	0.534222	0.529272	0.531747	0.00350067	178
1	GAPGTRQQTFV	336	Q	1	0.369145	0.665317	0.517231	0.209426	181
1	GAPQTRYQTFV	333	Q	1	0.553667	0.41833	0.485998	0.0956977	188
1	GAPGTQYQTFV	335	Q	1	0.459357	0.347104	0.403231	0.0793755	192
1	GAPGTRYRTFV	337	R	3	1.60589	1.77716	1.69153	0.242391	20
1	GAPGTRYQTFR	340	R	3	1.81046	1.53789	1.67417	0.273901	21
1	GAPGTRYQRFV	338	R	3	1.72975	1.56989	1.64982	0.31025	24
1	GRPGTRYQTFV	331	R	3	1.3587	1.67222	1.51546	0.681983	27
1	GAPGRRYQTFV	334	R	3	1.32732	1.59366	1.46049	0.299901	32
1	GAPGTRRQTFV	336	R	3	1.22512	1.41905	1.32208	0.127643	38
1	RAPGTRYQTFV	330	R	3	1.37175	1.23969	1.30572	0.340628	39
1	GAPRTRYQTFV	333	R	3	1.21659	1.33202	1.27431	0.147076	41
1	GAPGTRYQTRV	339	R	3	1.19778	1.26615	1.23196	0.093828	46
1	GAPGSRYQTFV	334	S	3	0.994986	1.13946	1.06723	0.62157	61
1	GSPGTRYQTFV	331	S	2	1.10411	0.820427	0.962268	0.364148	76
1	GAPGTRSQTFV	336	S	3	0.885469	0.868766	0.877118	0.241011	86
1	GAPSTRYQTFV	333	S	2	0.807241	0.693616	0.750428	0.313781	125
1	GAPGTRYQTSV	339	S	3	0.763754	0.710353	0.737054	0.129817	129
1	GAPGTRYSTFV	337	S	3	0.757236	0.68845	0.722843	0.0938833	133
1	SAPGTRYQTFV	330	S	3	0.715663	0.639298	0.67748	0.174796	144
1	GAPGTRYQSFV	338	S	3	0.689656	0.651741	0.670698	0.161148	145
1	GAPGTRYQTFS	340	S	3	0.551562	0.582245	0.566903	0.10651	172
1	GAPGTSYQTFV	335	S	3	0.45551	0.578739	0.517124	0.162334	182
1	*APGTRYQTFV	330	STOP	1	5.5396	4.72792	5.13376	0.573944	1
1	GAPGTRY*TFV	337	STOP	1	4.12473	4.42041	4.27257	0.209075	2
1	GAPGTRYQTF*	340	STOP	1	4.1668	4.26557	4.21619	0.0698441	3
1	GAPGTR*QTFV	336	STOP	1	3.54553	3.97199	3.75876	0.30155	4
1	G*PGTRYQTFV	331	STOP	1	3.93781	3.19009	3.56395	0.528716	5
1	GAPGTRYQ*FV	338	STOP	1	3.16624	3.69946	3.43285	0.377043	6
1	GAPGTRYQT*V	339	STOP	1	3.28429	3.51174	3.39801	0.160837	7
1	GAP*TRYQTFV	333	STOP	1	3.32177	3.46824	3.395	0.103576	8
1	GAPGT*YQTFV	335	STOP	1	2.53244	3.00186	2.76715	0.331926	11
1	GAPG*RYQTFV	334	STOP	1	1.64011	1.78522	1.71267	0.102605	18
1	GAPGTRYQTFV	338	syn	2	0.932436	0.944103	0.938269	0.05411	79	0.820675	0.0749704
1	GAPGTRYQTFV	340	syn	1	0.801985	0.958519	0.880252	0.110686	85
1	GAPGTRYQTFV	333	syn	1	0.727488	1.01317	0.870331	0.202011	89
0	GAPGTRYQTFV	NA	syn	1	0.856959	0.851702	0.85433	0.00371712	93
1	GAPGTRYQTFV	331	syn	2	0.95481	0.70213	0.82847	0.205961	98
1	GAPGTRYQTFV	339	syn	1	0.777275	0.842379	0.809827	0.0460358	102
1	GAPGTRYQTFV	334	syn	2	0.569678	0.965684	0.767681	0.247927	119
1	GAPGTRYQTFV	330	syn	1	0.784278	0.667085	0.725681	0.082868	131
1	GAPGTRYQTFV	335	syn	3	0.721471	0.700994	0.711232	0.129486	135
1	GAPGTRYTTFV	337	T	2	1.52524	1.17335	1.34929	0.447217	35
1	GAPGTRYQTFT	340	T	2	0.886559	1.59155	1.23906	0.798922	44
1	GAPGTRYQTTV	339	T	2	0.793679	0.759521	0.7766	0.0352241	115
1	GTPGTRYQTFV	331	T	2	0.414006	0.899468	0.656737	0.355614	150
1	GAPTTRYQTFV	333	T	1	0.698166	0.463983	0.581074	0.165592	170
1	TAPGTRYQTFV	330	T	2	0.65298	0.389641	0.52131	0.235225	179
1	GAPGTRTQTFV	336	T	1	0.547242	0.449181	0.498212	0.0693392	186
1	GAPGTTYQTFV	335	T	2	0.286173	0.511283	0.398728	0.151681	193
1	GAPGTRYQVFV	338	V	2	1.88921	1.81311	1.85116	0.220026	16
1	GAPGTRYVTFV	337	V	2	1.61586	1.72321	1.66953	0.128261	22
1	VAPGTRYQTFV	330	V	2	1.21968	1.01848	1.11908	0.332607	55
1	GAPGVRYQTFV	334	V	2	0.80194	0.932798	0.867369	0.224904	91
1	GAPVTRYQTFV	333	V	2	0.846418	0.728706	0.787562	0.109069	110
1	GAPGTRYQTVV	339	V	2	0.819667	0.733632	0.77665	0.0645366	114
1	GVPGTRYQTFV	331	V	2	0.806882	0.695692	0.751287	0.109398	124
1	GAPGTRVQTFV	336	V	2	0.613678	0.609081	0.61138	0.0911481	164
1	GAPGTVYQTFV	335	V	2	0.548428	0.585242	0.566835	0.07479	173
1	GAPGTRYQWFV	338	W	1	1.70005	1.51186	1.60596	0.133071	25
1	GAPGTRYWTFV	337	W	1	1.5151	1.4732	1.49415	0.0296275	29
1	GAPGTRYQTWV	339	W	1	1.06677	1.3616	1.21418	0.208478	49
1	GAPGTRWQTFV	336	W	1	1.12063	1.04421	1.08242	0.0540319	59
1	GAPGWRYQTFV	334	W	1	1.01119	1.12999	1.07059	0.0840045	60
1	WAPGTRYQTFV	330	W	1	1.00813	1.08556	1.04684	0.0547533	65
1	GWPGTRYQTFV	331	W	1	0.992251	0.947369	0.96981	0.031736	74
1	GAPGTWYQTFV	335	W	1	0.942364	0.939311	0.940837	0.00215875	78
1	GAPWTRYQTFV	333	W	1	0.949121	0.753768	0.851444	0.138136	94
1	GAPGTRYQTFW	340	W	1	0.737561	0.801979	0.76977	0.0455505	117
1	GAPGTRYYTFV	337	Y	1	1.49889	0.994787	1.24684	0.356451	43
1	GAPGTYYQTFV	335	Y	1	1.43947	0.606748	1.02311	0.588824	67
1	GAPGYRYQTFV	334	Y	1	0.82774	0.743394	0.785567	0.0596418	111
1	GAPGTRYQTFY	340	Y	1	0.755892	0.781846	0.768869	0.0183519	118
1	GAPGTRYQYFV	338	Y	1	0.767386	0.745762	0.756574	0.0152907	122
1	GYPGTRYQTFV	331	Y	1	0.374004	0.951248	0.662626	0.408173	149
1	GAPGTRYQTYV	339	Y	1	0.625939	0.618819	0.622379	0.0050348	159
1	YAPGTRYQTFV	330	Y	1	0.173497	0.405712	0.289604	0.164201	198

## Sheet: R332P-HIV-LOF_Matrix_Fig4S2A
Position	G	P	A	I	L	V	F	W	Y	M	C	S	T	N	Q	H	K	R	D	E	stop
G330	0.725681	0.666504	0.793831	3.19853	0.980364	1.11908		1.04684	0.289604	1.18114	1.05076	0.67748	0.52131		0.563309	0.462172	1.96577	1.30572	0.630164	0.575072	5.13376
A331	1.13301	0.731383	0.82847	NA	1.01688	0.751287	0.505806	0.96981	0.662626	0.790055	0.684632	0.962268	0.656737	1.94359	0.531747	0.394114	0.988205	1.51546	0.621745	0.725181	3.56395
R332
G333	0.870331	1.41439	0.643718	NA	0.710034	0.787562	NA	0.851444	NA	1.46344	0.781943	0.750428	0.581074	NA	0.485998	NA	0.710913	1.27431	0.167226	0.584681	3.395
T334	0.840817	0.653628	1.72526	1.16582	0.874089	0.867369	1.4798	1.07059	0.785567	1.05458	0.972211	1.06723	0.767681	1.00658	0.670215	1.09347	0.893423	1.46049	0.752872	0.640002	1.71267
R335	0.550801	0.503493	0.495183	0.364712	0.465079	0.566835	0.678172	0.940837	1.02311	0.614527	0.583444	0.517124	0.398728	0.306053	0.403231	0.274848	0.587808	0.711232	0.437943	0.839524	2.76715
Y336	0.968075	0.868098	0.782962	1.20783	0.862279	0.61138	0.681521	1.08242	0.85433	1.28414	0.802187	0.877118	0.498212	NA	0.517231	0.636829	1.66627	1.32208	0.916968	1.50914	3.75876
Q337	0.798672	1.01988	0.630088	2.19852	1.2214	1.66953	0.872159	1.49415	1.24684	1.32997	0.792539	0.722843	1.34929	1.02832	0.85433	0.498799	1.15174	1.69153	0.377329	0.619116	4.27257
T338	0.564392	0.7709	0.762373	3.07644	1.70331	1.85116	1.85299	1.60596	0.756574	1.10032	0.815653	0.670698	0.938269	0.740184	0.592905	0.793815	1.08669	1.64982	0.635016	0.544869	3.43285
F339	0.71845	1.2355	0.697961	0.669321	0.683239	0.77665	0.809827	1.21418	0.622379	0.906081	0.61626	0.737054	0.7766	0.917555	0.834431	0.799803	1.53267	1.23196	1.3342	1.05804	3.39801
V340	0.812503	0.745365	0.51797	1.21581	1.27413	0.880252	0.696814	0.76977	0.768869	0.920821	0.589713	0.566903	1.23906	0.761133	0.64309	0.958069	1.37507	1.67417	0.810253	0.743606	4.21619
	NB: WT bolded; Y336Y & Q337Q values are identical as they have identical nucleotide sequences
	NA: excluded due to low read counts in input library

## Sheet: R332P-HIV-LOF_position_4S2B
WT (R332P)	G330	A331	R332	G333	T334	R335	Y336	Q337	T338	F339	V340
0.725681		1.13301			0.840817	0.550801	0.968075	0.798672	0.564392	0.71845	0.812503
0.82847	0.666504	0.731383		1.41439	0.653628	0.503493	0.868098	1.01988	0.7709	1.2355	0.745365
	0.793831			0.643718	1.72526	0.495183	0.782962	0.630088	0.762373	0.697961	0.51797
0.870331	3.19853				1.16582	0.364712	1.20783	2.19852	3.07644	0.669321	1.21581
0.767681	0.980364	1.01688		0.710034	0.874089	0.465079	0.862279	1.2214	1.70331	0.683239	1.27413
0.711232	1.11908	0.751287		0.787562	0.867369	0.566835	0.61138	1.66953	1.85116	0.77665
0.85433		0.505806			1.4798	0.678172	0.681521	0.872159	1.85299		0.696814
	1.04684	0.96981		0.851444	1.07059	0.940837	1.08242	1.49415	1.60596	1.21418	0.76977
0.938269	0.289604	0.662626			0.785567	1.02311		1.24684	0.756574	0.622379	0.768869
0.809827	1.18114	0.790055		1.46344	1.05458	0.614527	1.28414	1.32997	1.10032	0.906081	0.920821
0.880252	1.05076	0.684632		0.781943	0.972211	0.583444	0.802187	0.792539	0.815653	0.61626	0.589713
	0.67748	0.962268		0.750428	1.06723	0.517124	0.877118	0.722843	0.670698	0.737054	0.566903
	0.52131	0.656737		0.581074		0.398728	0.498212	1.34929		0.7766	1.23906
		1.94359			1.00658	0.306053		1.02832	0.740184	0.917555	0.761133
	0.563309	0.531747		0.485998	0.670215	0.403231	0.517231		0.592905	0.834431	0.64309
	0.462172	0.394114			1.09347	0.274848	0.636829	0.498799	0.793815	0.799803	0.958069
	1.96577	0.988205		0.710913	0.893423	0.587808	1.66627	1.15174	1.08669	1.53267	1.37507
	1.30572	1.51546		1.27431	1.46049		1.32208	1.69153	1.64982	1.23196	1.67417
	0.630164	0.621745		0.167226	0.752872	0.437943	0.916968	0.377329	0.635016	1.3342	0.810253
	0.575072	0.725181		0.584681	0.640002	0.839524	1.50914	0.619116	0.544869	1.05804	0.743606
Holm-Sidak's multiple comparisons test	Mean Diff.	Significant?	Summary	Adjusted P Value
WT (R332P) vs. G330	-0.181	No	ns	0.9033
WT (R332P) vs. A331	-0.04513	No	ns	0.9033
WT (R332P) vs. G333	0.02016	No	ns	0.9033
WT (R332P) vs. T334	-0.1832	No	ns	0.2396
WT (R332P) vs. R335	0.2653	Yes	**	0.0053
WT (R332P) vs. Y336	-0.129	No	ns	0.5356
WT (R332P) vs. Q337	-0.2695	No	ns	0.5356
WT (R332P) vs. T338	-0.3148	No	ns	0.7993
WT (R332P) vs. F339	-0.09313	No	ns	0.7993
WT (R332P) vs. V340	-0.07844	No	ns	0.8263

## Sheet: R332P-HIV-LOF_aminoacid_4S2B
WT (R332P)	G	P	A	I	L	V	F	W	Y	M	C	S	T	N	Q	H	K	R	D	E	stop
0.725681		0.666504	0.793831	3.19853	0.980364	1.11908		1.04684	0.289604	1.18114	1.05076	0.67748	0.52131		0.563309	0.462172	1.96577	1.30572	0.630164	0.575072	5.13376
0.82847	1.13301	0.731383			1.01688	0.751287	0.505806	0.96981	0.662626	0.790055	0.684632	0.962268	0.656737	1.94359	0.531747	0.394114	0.988205	1.51546	0.621745	0.725181	3.56395
0.870331		1.41439	0.643718		0.710034	0.787562		0.851444		1.46344	0.781943	0.750428	0.581074		0.485998		0.710913	1.27431	0.167226	0.584681	3.395
0.767681	0.840817	0.653628	1.72526	1.16582	0.874089	0.867369	1.4798	1.07059	0.785567	1.05458	0.972211	1.06723		1.00658	0.670215	1.09347	0.893423	1.46049	0.752872	0.640002	1.71267
0.711232	0.550801	0.503493	0.495183	0.364712	0.465079	0.566835	0.678172	0.940837	1.02311	0.614527	0.583444	0.517124	0.398728	0.306053	0.403231	0.274848	0.587808		0.437943	0.839524	2.76715
0.85433	0.968075	0.868098	0.782962	1.20783	0.862279	0.61138	0.681521	1.08242		1.28414	0.802187	0.877118	0.498212		0.517231	0.636829	1.66627	1.32208	0.916968	1.50914	3.75876
	0.798672	1.01988	0.630088	2.19852	1.2214	1.66953	0.872159	1.49415	1.24684	1.32997	0.792539	0.722843	1.34929	1.02832		0.498799	1.15174	1.69153	0.377329	0.619116	4.27257
0.938269	0.564392	0.7709	0.762373	3.07644	1.70331	1.85116	1.85299	1.60596	0.756574	1.10032	0.815653	0.670698		0.740184	0.592905	0.793815	1.08669	1.64982	0.635016	0.544869	3.43285
0.809827	0.71845	1.2355	0.697961	0.669321	0.683239	0.77665		1.21418	0.622379	0.906081	0.61626	0.737054	0.7766	0.917555	0.834431	0.799803	1.53267	1.23196	1.3342	1.05804	3.39801
0.880252	0.812503	0.745365	0.51797	1.21581	1.27413		0.696814	0.76977	0.768869	0.920821	0.589713	0.566903	1.23906	0.761133	0.64309	0.958069	1.37507	1.67417	0.810253	0.743606	4.21619
Holm-Sidak's multiple comparisons test	Mean Diff.	Significant?	Summary	Adjusted P Value
WT (R332P) vs. G	0.02234	No	ns	0.9945
WT (R332P) vs. P	-0.04024	No	ns	0.9945
WT (R332P) vs. A	0.03741	No	ns	0.9945
WT (R332P) vs. I	-0.8164	No	ns	0.6938
WT (R332P) vs. L	-0.1584	No	ns	0.901
WT (R332P) vs. V	-0.1794	No	ns	0.9254
WT (R332P) vs. F	-0.1461	No	ns	0.9945
WT (R332P) vs. W	-0.2839	No	ns	0.0981
WT (R332P) vs. Y	0.05123	No	ns	0.9945
WT (R332P) vs. M	-0.2438	No	ns	0.2219
WT (R332P) vs. C	0.05174	No	ns	0.9945
WT (R332P) vs. S	0.06576	No	ns	0.9814
WT (R332P) vs. T	0.06805	No	ns	0.9945
WT (R332P) vs. N	-0.137	No	ns	0.9945
WT (R332P) vs. Q	0.2382	Yes	*	0.0138
WT (R332P) vs. H	0.1638	No	ns	0.7831
WT (R332P) vs. K	-0.3752	No	ns	0.4758
WT (R332P) vs. R	-0.6377	Yes	***	0.0001
WT (R332P) vs. D	0.1523	No	ns	0.9254
WT (R332P) vs. E	0.03675	No	ns	0.9945
WT (R332P) vs. stop	-2.744	Yes	***	0.0004
