# Supplementary material for: Mutational resilience of antiviral restriction favors primate TRIM5α in host-virus evolutionary arms races
Source: eLife. 2020 Sep 15;9:e59988. doi: 10.7554/eLife.59988 (PMC7492085; doi:10.7554/eLife.59988)
Supplement: Figure 5—source data 1. [file elife-59988-fig5-data1.xlsx]

## Sheet: Replicates_Fig5AB
dist_codon	seq_aa	mutcod_index	mut_aa	num_nt_seqs	enrichA_Avg	enrichB_Avg	enrich_Avg_RepAndAA	enrich_SD_RepAndAA	Rank	WT avg	WT SD
1	QAPGTLFTFPS*T	343	STOP	1	6.44664	7.52905	6.98785	0.76538	1
1	QAPGTLF*FPSLT	339	STOP	1	4.45257	4.14169	4.29713	0.219823	2
1	QAPGTLFTF*SLT	341	STOP	1	4.59405	3.53545	4.06475	0.748543	4
1	Q*PGTLFTFPSLT	333	STOP	1	2.96881	3.62377	3.29629	0.463122	6
1	QA*GTLFTFPSLT	334	STOP	1	3.21834	3.10799	3.16317	0.0780293	8
1	QAPG*LFTFPSLT	336	STOP	1	3.01072	2.54987	2.7803	0.325873	11
1	QAP*TLFTFPSLT	335	STOP	1	2.65861	2.73097	2.69479	0.0511607	12
1	QAPGTL*TFPSLT	338	STOP	1	2.64768	2.70819	2.67794	0.0427891	13
1	QAPGTLFTFP*LT	342	STOP	1	2.83764	2.46684	2.65224	0.26219	14
1	QAPGTLFT*PSLT	340	STOP	1	2.81624	2.34076	2.5785	0.336216	16
1	QAPGTLFTFPSL*	344	STOP	1	2.51694	2.34445	2.4307	0.121966	19
1	*APGTLFTFPSLT	332	STOP	1	2.01201	2.79128	2.40165	0.551029	21
1	QAPGT*FTFPSLT	337	STOP	1	1.15837	1.6144	1.38639	0.322462	56
1	QAPGTLFTFASLT	341	A	2	1.18268	1.12776	1.15522	0.174192	77
1	QAPGTLFAFPSLT	339	A	2	1.02259	1.01696	1.01978	0.106583	97
1	QAPGTLFTAPSLT	340	A	2	1.02777	0.87993	0.953849	0.13067	113
1	QAPGTLATFPSLT	338	A	2	0.920948	0.81483	0.867889	0.183809	133
1	AAPGTLFTFPSLT	332	A	2	0.84836	0.819458	0.833909	0.0823	140
1	QAPGTLFTFPALT	342	A	2	0.755774	0.844748	0.800261	0.0725696	151
1	QAPGTLFTFPSAT	343	A	2	0.720027	0.668989	0.694508	0.114685	194
1	QAPGTLFTFPSLA	344	A	2	0.66065	0.634998	0.647824	0.108826	210
1	QAPATLFTFPSLT	335	A	2	0.606613	0.647462	0.627037	0.0635049	217
1	QAAGTLFTFPSLT	334	A	2	0.66804	0.566449	0.617244	0.212668	219
1	QAPGALFTFPSLT	336	A	2	0.610848	0.598531	0.604689	0.0496323	224
1	QAPGTAFTFPSLT	337	A	2	0.540895	0.642848	0.591871	0.0606746	230
1	QAPGTCFTFPSLT	337	C	1	1.57269	1.66986	1.62128	0.0687049	36
1	QAPGTLFCFPSLT	339	C	1	1.60477	1.17523	1.39	0.303733	54
1	QAPGTLFTCPSLT	340	C	1	1.20807	1.15487	1.18147	0.0376191	73
1	QAPGTLFTFCSLT	341	C	1	0.972855	0.961851	0.967353	0.00778105	106
1	CAPGTLFTFPSLT	332	C	1	0.830631	0.908533	0.869582	0.0550851	130
1	QAPGTLFTFPCLT	342	C	1	0.773494	0.890508	0.832001	0.0827413	141
1	QAPGTLFTFPSLC	344	C	1	0.683307	0.775554	0.72943	0.0652281	176
1	QAPGTLCTFPSLT	338	C	1	0.666912	0.760024	0.713468	0.0658404	184
1	QAPGTLFTFPSCT	343	C	1	0.632815	0.69905	0.665932	0.0468352	204
1	QACGTLFTFPSLT	334	C	1	0.615708	0.50484	0.560274	0.0783952	242
1	QAPGCLFTFPSLT	336	C	1	0.367386	0.677426	0.522406	0.219231	252
1	QCPGTLFTFPSLT	333	C	1	0.579944	0.460829	0.520387	0.0842271	254
1	QAPCTLFTFPSLT	335	C	1	0.28715	0.626621	0.456885	0.240042	264
1	QAPGTLDTFPSLT	338	D	1	1.53256	1.78626	1.65941	0.179395	33
1	QAPGDLFTFPSLT	336	D	1	1.32642	1.06132	1.19387	0.187459	72
1	QAPGTLFTDPSLT	340	D	1	0.972715	0.878761	0.925738	0.0664359	116
1	DAPGTLFTFPSLT	332	D	1	0.912417	0.935082	0.923749	0.016027	117
1	QAPGTLFTFDSLT	341	D	1	0.790108	0.850665	0.820386	0.0428202	147
1	QAPGTLFTFPSDT	343	D	1	0.705	0.806623	0.755812	0.071858	168
1	QAPGTLFTFPDLT	342	D	1	0.730702	0.719903	0.725303	0.00763591	178
1	QAPGTLFDFPSLT	339	D	1	0.788035	0.421858	0.604946	0.258926	223
1	QAPGTLFTFPSLD	344	D	1	0.628295	0.544335	0.586315	0.0593684	233
1	QADGTLFTFPSLT	334	D	1	0.618861	0.550576	0.584718	0.0482847	234
1	QDPGTLFTFPSLT	333	D	1	0.475029	0.536631	0.50583	0.0435591	256
1	QAPGTDFTFPSLT	337	D	1	0.279842	0.546967	0.413404	0.188886	267
1	QAPDTLFTFPSLT	335	D	1	0.448902	0.332025	0.390464	0.0826446	270
1	QAPGTLFTEPSLT	340	E	1	0.87033	1.05079	0.960558	0.127602	109
1	QAPGTLFTFPELT	342	E	1	0.946189	0.896299	0.921244	0.0352781	119
1	QAPGTLFTFPSET	343	E	1	0.977561	0.756191	0.866876	0.156532	134
1	QAPGTLFTFESLT	341	E	1	0.841566	0.733237	0.787402	0.0766008	157
1	QAPGELFTFPSLT	336	E	1	0.855196	0.60703	0.731113	0.17548	174
1	EAPGTLFTFPSLT	332	E	1	0.657199	0.739283	0.698241	0.0580418	191
1	QAPGTLFEFPSLT	339	E	1	0.5835	0.759742	0.671621	0.124622	201
1	QAEGTLFTFPSLT	334	E	1	0.443709	0.704453	0.574081	0.184373	235
1	QAPGTLETFPSLT	338	E	1	0.578292	0.523394	0.550843	0.0388191	246
1	QAPGTEFTFPSLT	337	E	1	0.525736	0.517528	0.521632	0.00580436	253
1	QEPGTLFTFPSLT	333	E	1	0.5636	0.469674	0.516637	0.0664159	255
1	QAPGTLFTFPSLE	344	E	1	0.537395	0.39464	0.466017	0.100943	262
1	QAPETLFTFPSLT	335	E	1	0.41556	0.297891	0.356725	0.0832042	272
1	QAPGTLFTFFSLT	341	F	1	2.97058	2.68736	2.82897	0.200268	10
1	QAPGTLFTFPFLT	342	F	1	2.22203	2.22176	2.2219	0.000190365	23
1	QAPGTLFFFPSLT	339	F	1	1.82454	1.44348	1.63401	0.26945	34
1	QAFGTLFTFPSLT	334	F	1	1.44965	1.69241	1.57103	0.171656	40
1	QAPGFLFTFPSLT	336	F	1	1.16208	1.25541	1.20874	0.0659946	70
1	QAPGTFFTFPSLT	337	F	1	1.10648	1.13763	1.12206	0.0220227	82
1	FAPGTLFTFPSLT	332	F	1	1.20478	0.964099	1.08444	0.170188	87
1	QAPFTLFTFPSLT	335	F	1	1.03814	1.08231	1.06023	0.031238	89
1	QAPGTLFTFPSLF	344	F	1	0.970384	1.14046	1.05542	0.120263	90
1	QFPGTLFTFPSLT	333	F	1	0.992175	0.922452	0.957314	0.0493015	112
1	QAPGTLFTFPSFT	343	F	1	0.692287	0.634165	0.663226	0.041099	206
1	QAPGTLFTGPSLT	340	G	2	1.03208	1.03663	1.03435	0.274562	95
1	GAPGTLFTFPSLT	332	G	2	0.82273	0.915216	0.868973	0.122063	131
1	QAPGTLFTFPSGT	343	G	2	0.785371	0.700069	0.74272	0.0715506	171
1	QAGGTLFTFPSLT	334	G	2	0.7454	0.706166	0.725783	0.0864629	177
1	QGPGTLFTFPSLT	333	G	2	0.743297	0.681987	0.712642	0.178194	185
1	QAPGTLFTFPSLG	344	G	2	0.679726	0.65607	0.667898	0.0575556	203
1	QAPGTLGTFPSLT	338	G	2	0.731177	0.568664	0.64992	0.132219	209
1	QAPGTLFTFPGLT	342	G	2	0.612974	0.578032	0.595503	0.0758644	227
1	QAPGGLFTFPSLT	336	G	2	0.645343	0.545489	0.595416	0.138402	228
1	QAPGTLFGFPSLT	339	G	2	0.535878	0.568217	0.552048	0.0261271	244
1	QAPGTLFTFGSLT	341	G	2	0.481025	0.47693	0.478978	0.0873738	259
1	QAPGTGFTFPSLT	337	G	2	0.469633	0.479543	0.474588	0.104234	261
1	QAPGTLFTFPSLH	344	H	1	1.68418	1.41644	1.55031	0.189325	43
1	QAPGTLHTFPSLT	338	H	1	1.48015	1.30009	1.39012	0.127321	53
1	QAPGTLFTFHSLT	341	H	1	1.17397	1.38137	1.27767	0.146654	60
1	QAPGTLFTHPSLT	340	H	1	1.2067	0.848865	1.02778	0.253028	96
1	QAPGTLFTFPHLT	342	H	1	0.905077	0.928823	0.91695	0.0167914	121
1	QAHGTLFTFPSLT	334	H	1	1.05509	0.7697	0.912396	0.201803	123
1	QAPGTLFHFPSLT	339	H	1	1.01028	0.646734	0.828508	0.257067	143
1	QAPHTLFTFPSLT	335	H	1	0.7565	0.890259	0.823379	0.094582	144
1	QAPGTLFTFPSHT	343	H	1	0.826518	0.80472	0.815619	0.0154129	148
1	QAPGHLFTFPSLT	336	H	1	0.81445	0.564662	0.689556	0.176627	196
1	HAPGTLFTFPSLT	332	H	1	0.643588	0.695624	0.669606	0.0367954	202
1	QAPGTHFTFPSLT	337	H	1	0.690834	0.612636	0.651735	0.0552939	208
1	QHPGTLFTFPSLT	333	H	1	0.436244	0.404868	0.420556	0.0221863	265
1	IAPGTLFTFPSLT	332	I	1	2.33555	2.54045	2.438	0.144888	18
1	QAPGTLFTFISLT	341	I	1	2.33526	2.27075	2.303	0.0456195	22
1	QAPGILFTFPSLT	336	I	1	1.3079	0.97994	1.14392	0.231902	78
1	QAPGTLFIFPSLT	339	I	1	0.917549	1.36437	1.14096	0.315947	79
1	QAPGTLITFPSLT	338	I	1	1.01337	1.25701	1.13519	0.172281	81
1	QIPGTLFTFPSLT	333	I	1	0.964095	1.06443	1.01426	0.0709486	98
1	QAPGTLFTIPSLT	340	I	1	1.07752	0.934861	1.00619	0.100877	101
1	QAPGTLFTFPILT	342	I	1	0.98087	0.95375	0.96731	0.0191771	107
1	QAIGTLFTFPSLT	334	I	1	0.804515	1.03959	0.922052	0.166222	118
1	QAPGTLFTFPSLI	344	I	1	0.894942	0.859558	0.87725	0.0250206	129
1	QAPITLFTFPSLT	335	I	1	0.797803	0.779974	0.788888	0.0126071	155
1	QAPGTLFTFPSIT	343	I	1	0.677272	0.729191	0.703232	0.0367125	188
1	QAPGTIFTFPSLT	337	I	1	0.259741	0.408285	0.334013	0.105036	273
1	QAPGTLKTFPSLT	338	K	1	4.77223	3.74077	4.2565	0.729352	3
1	QAPGTLFTFKSLT	341	K	1	2.21786	2.00132	2.10959	0.153115	27
1	QAPGTLFKFPSLT	339	K	1	1.88691	1.18446	1.53569	0.4967	45
1	QAPGTLFTKPSLT	340	K	1	1.34372	1.70602	1.52487	0.256185	46
1	QAPGTLFTFPKLT	342	K	1	1.71825	1.25814	1.48819	0.325352	47
1	QAPGTKFTFPSLT	337	K	1	1.57655	1.32451	1.45053	0.17822	48
1	QAPKTLFTFPSLT	335	K	1	1.31706	1.12796	1.22251	0.133713	66
1	QAPGKLFTFPSLT	336	K	1	1.14836	1.19916	1.17376	0.0359243	74
1	QAPGTLFTFPSLK	344	K	1	1.04988	1.0562	1.05304	0.00446475	91
1	QAPGTLFTFPSKT	343	K	1	0.770922	1.11912	0.945021	0.246213	115
1	KAPGTLFTFPSLT	332	K	1	0.961114	0.873035	0.917075	0.0622811	120
1	QAKGTLFTFPSLT	334	K	1	0.79616	0.84583	0.820995	0.0351221	145
1	QKPGTLFTFPSLT	333	K	1	0.588433	0.64499	0.616711	0.0399914	220
1	QAPGTLFTFLSLT	341	L	3	1.94211	1.97787	1.95999	0.249736	29
1	LAPGTLFTFPSLT	332	L	3	1.28699	1.48976	1.38837	0.288979	55
1	QALGTLFTFPSLT	334	L	3	1.22896	1.20441	1.21668	0.275768	67
1	QAPGTLFTFPLLT	342	L	3	1.13546	1.19491	1.16519	0.0811758	75
1	QAPGTLFTFPSLL	344	L	3	1.05944	1.21156	1.1355	0.326995	80
1	QAPGTLFTLPSLT	340	L	3	0.964497	1.02568	0.995089	0.151583	103
1	QAPGTLFLFPSLT	339	L	3	1.0233	0.963798	0.99355	0.0822033	104
1	QAPLTLFTFPSLT	335	L	3	0.922786	0.997634	0.96021	0.106984	110
1	QAPGLLFTFPSLT	336	L	3	0.881752	0.898662	0.890207	0.0941798	125
1	QAPGTLLTFPSLT	338	L	3	0.712051	0.83745	0.77475	0.0830891	160
1	QLPGTLFTFPSLT	333	L	3	0.617508	0.830644	0.724076	0.210784	179
1	QAPMTLFTFPSLT	335	M	1	2.68159	3.15851	2.92005	0.337234	9
1	QAPGTLFTFMSLT	341	M	1	2.02748	1.5817	1.80459	0.315215	31
1	QAPGTLFTMPSLT	340	M	1	1.07316	1.25195	1.16255	0.126425	76
1	QAPGTLFTFPSMT	343	M	1	1.10245	0.976584	1.03952	0.0890017	94
1	QAPGTLFTFPMLT	342	M	1	0.978334	0.848232	0.913283	0.0919959	122
1	MAPGTLFTFPSLT	332	M	1	0.842747	0.931214	0.886981	0.0625561	126
1	QAPGTLFTFPSLM	344	M	1	0.883002	0.742819	0.812911	0.0991246	149
1	QAPGTLMTFPSLT	338	M	1	0.725844	0.851227	0.788536	0.0886594	156
1	QAMGTLFTFPSLT	334	M	1	0.722189	0.821764	0.771977	0.0704098	162
1	QAPGMLFTFPSLT	336	M	1	0.774831	0.742929	0.75888	0.0225581	166
1	QAPGTLFMFPSLT	339	M	1	0.775324	0.724532	0.749928	0.0359158	169
1	QMPGTLFTFPSLT	333	M	1	0.643931	0.498955	0.571443	0.102514	237
1	QAPGTMFTFPSLT	337	M	1	0.466526	0.457124	0.461825	0.00664813	263
1	QAPNTLFTFPSLT	335	N	1	1.09323	1.07732	1.08527	0.011251	86
1	QAPGTLFTFPNLT	342	N	1	0.978934	0.940079	0.959507	0.0274749	111
1	QAPGTNFTFPSLT	337	N	1	0.916336	0.846432	0.881384	0.0494296	127
1	QAPGTLFTFNSLT	341	N	1	0.969712	0.754305	0.862009	0.152316	135
1	NAPGTLFTFPSLT	332	N	1	0.863328	0.828753	0.846041	0.0244488	137
1	QAPGTLFTNPSLT	340	N	1	0.86032	0.720107	0.790213	0.0991452	154
1	QAPGTLFNFPSLT	339	N	1	0.742525	0.719868	0.731196	0.0160215	173
1	QNPGTLFTFPSLT	333	N	1	0.6794	0.764472	0.721936	0.0601547	181
1	QAPGNLFTFPSLT	336	N	1	0.59005	0.756109	0.673079	0.117421	200
1	QANGTLFTFPSLT	334	N	1	0.507023	0.762872	0.634948	0.180912	215
1	QAPGTLNTFPSLT	338	N	1	0.692464	0.567907	0.630185	0.0880751	216
1	QAPGTLFTFPSLN	344	N	1	0.467282	0.663557	0.565419	0.138787	238
1	QAPGTLFTFPSNT	343	N	1	0.435388	0.52134	0.478364	0.0607772	260
1	PAPGTLFTFPSLT	332	P	2	1.43701	1.4519	1.44445	0.456794	49
1	QAPGTLFTPPSLT	340	P	2	1.11768	0.982982	1.05033	0.111111	92
1	QAPPTLFTFPSLT	335	P	2	0.883123	0.853329	0.868226	0.0895857	132
1	QPPGTLFTFPSLT	333	P	2	0.851642	0.842617	0.84713	0.0919905	136
1	QAPGTLPTFPSLT	338	P	2	0.741797	0.719958	0.730878	0.103598	175
1	QAPGPLFTFPSLT	336	P	2	0.652825	0.762539	0.707682	0.137276	186
1	QAPGTLFPFPSLT	339	P	2	0.765521	0.64173	0.703626	0.0963025	187
1	QAPGTLFTFPPLT	342	P	2	0.671086	0.689655	0.68037	0.0432297	198
1	QAPGTLFTFPSPT	343	P	2	0.692974	0.664058	0.678516	0.0284063	199
1	QAPGTLFTFPSLP	344	P	2	0.669672	0.616316	0.642994	0.0729883	213
1	QAPGTPFTFPSLT	337	P	2	0.544989	0.643477	0.594233	0.0920321	229
1	QAPGTLFTFQSLT	341	Q	1	2.48594	2.49576	2.49085	0.00694205	17
1	QAPGTLFTQPSLT	340	Q	1	0.930655	0.997508	0.964081	0.0472722	108
1	QAPGTLQTFPSLT	338	Q	1	0.681634	0.873833	0.777734	0.135905	158
1	QAPGTQFTFPSLT	337	Q	1	0.837789	0.716669	0.777229	0.085645	159
1	QAPGQLFTFPSLT	336	Q	1	0.592141	0.804031	0.698086	0.149829	192
1	QAPGTLFTFPQLT	342	Q	1	0.695144	0.684146	0.689645	0.00777699	195
1	QAQGTLFTFPSLT	334	Q	1	0.628786	0.748332	0.688559	0.0845315	197
1	QAPGTLFQFPSLT	339	Q	1	0.656381	0.58785	0.622116	0.0484583	218
1	QAPGTLFTFPSQT	343	Q	1	0.693281	0.513128	0.603204	0.127387	225
1	QAPQTLFTFPSLT	335	Q	1	0.476992	0.605359	0.541175	0.0907698	247
1	QAPGTLFTFPSLQ	344	Q	1	0.509948	0.570334	0.540141	0.0426992	249
1	QQPGTLFTFPSLT	333	Q	1	0.383712	0.417772	0.400742	0.0240834	269
1	QAPGTLFRFPSLT	339	R	3	2.45211	2.79713	2.62462	0.680755	15
1	QAPGTLFTFPRLT	342	R	3	2.21988	2.07884	2.14936	0.549915	25
1	QAPGTLFTFRSLT	341	R	3	1.53647	1.69579	1.61613	0.114231	37
1	QAPGTLFTRPSLT	340	R	3	1.56956	1.57472	1.57214	0.17606	39
1	QAPGTLFTFPSLR	344	R	3	1.5491	1.56801	1.55855	0.734377	42
1	QAPRTLFTFPSLT	335	R	3	1.49412	1.57771	1.53592	0.43245	44
1	QAPGTLRTFPSLT	338	R	3	1.33489	1.27102	1.30296	0.0865096	58
1	QAPGRLFTFPSLT	336	R	3	1.24688	1.29267	1.26978	0.144882	61
1	QAPGTRFTFPSLT	337	R	3	1.22463	1.26865	1.24664	0.206615	63
1	QRPGTLFTFPSLT	333	R	3	1.28228	1.16512	1.2237	0.237378	65
1	RAPGTLFTFPSLT	332	R	3	1.23998	1.17862	1.2093	0.115549	69
1	QARGTLFTFPSLT	334	R	3	0.99489	1.00901	1.00195	0.196601	102
1	QAPGTLFTFPSRT	343	R	3	0.963504	0.975302	0.969403	0.232286	105
1	QAPSTLFTFPSLT	335	S	3	0.799539	0.873379	0.836459	0.177272	139
1	QAPGTLSTFPSLT	338	S	3	0.816048	0.765416	0.790732	0.118243	153
1	QAPGTLFTSPSLT	340	S	3	0.69032	0.854153	0.772237	0.184442	161
1	QAPGTLFTFSSLT	341	S	3	0.792676	0.745219	0.768948	0.110526	164
1	SAPGTLFTFPSLT	332	S	3	0.721081	0.745896	0.733488	0.159796	172
1	QSPGTLFTFPSLT	333	S	3	0.672298	0.72532	0.698809	0.263238	190
1	QAPGTLFSFPSLT	339	S	3	0.660355	0.670657	0.665506	0.100508	205
1	QAPGTLFTFPSLS	344	S	3	0.630146	0.655982	0.643064	0.200732	212
1	QAPGTLFTFPSST	343	S	3	0.605966	0.626963	0.616465	0.101835	221
1	QASGTLFTFPSLT	334	S	3	0.535689	0.589473	0.562581	0.0628617	240
1	QAPGTSFTFPSLT	337	S	3	0.557673	0.558648	0.55816	0.0625491	243
1	QAPGSLFTFPSLT	336	S	3	0.439495	0.551651	0.495573	0.0937177	257
1	QAPGTLFTFPTLT	342	T	2	1.58909	1.80449	1.69679	1.24945	32
1	QAPGTLFTFPSTT	343	T	2	1.01145	1.00351	1.00748	0.503383	99
1	QAPGTLFTFTSLT	341	T	2	0.987019	0.90814	0.947579	0.114827	114
1	QAPGTLTTFPSLT	338	T	2	0.824015	0.715499	0.769757	0.0720725	163
1	QAPGTLFTTPSLT	340	T	2	0.7239	0.681432	0.702666	0.0978967	189
1	QAPTTLFTFPSLT	335	T	2	0.685798	0.628459	0.657129	0.107375	207
1	QATGTLFTFPSLT	334	T	2	0.593425	0.589392	0.591409	0.263069	231
1	QTPGTLFTFPSLT	333	T	2	0.501927	0.542935	0.522431	0.0807608	251
1	TAPGTLFTFPSLT	332	T	2	0.506172	0.466334	0.486253	0.0846891	258
1	QAPGTTFTFPSLT	337	T	2	0.364671	0.456625	0.410648	0.0983893	268
1	VAPGTLFTFPSLT	332	V	2	1.41807	1.40628	1.41217	0.537021	51
1	QAPGTLFTFVSLT	341	V	2	1.41415	1.25731	1.33573	0.155203	57
1	QAPGTLFTVPSLT	340	V	2	1.42139	1.06048	1.24093	0.322953	64
1	QAPGTLFVFPSLT	339	V	2	1.22565	1.20261	1.21413	0.132114	68
1	QAPVTLFTFPSLT	335	V	2	1.08565	1.13025	1.10795	0.18027	85
1	QAPGTLFTFPVLT	342	V	2	1.07056	1.0112	1.04088	0.185828	93
1	QAPGTLFTFPSLV	344	V	2	0.931698	0.824148	0.877923	0.134313	128
1	QAPGVLFTFPSLT	336	V	2	0.821205	0.820357	0.820781	0.0361946	146
1	QAPGTLVTFPSLT	338	V	2	0.853851	0.682178	0.768014	0.177762	165
1	QVPGTLFTFPSLT	333	V	2	0.722132	0.791303	0.756717	0.110947	167
1	QAVGTLFTFPSLT	334	V	2	0.502606	0.571359	0.536982	0.0479345	250
1	QAPGTLFTFPSVT	343	V	2	0.399878	0.427477	0.413678	0.0506833	266
1	QAPGTVFTFPSLT	337	V	2	0.388182	0.346857	0.36752	0.0461251	271
1	QAPGTLFTFWSLT	341	W	1	3.67889	3.51878	3.59884	0.113214	5
1	QWPGTLFTFPSLT	333	W	1	3.32067	3.14999	3.23533	0.12069	7
1	QAPGTLFWFPSLT	339	W	1	2.17379	2.17542	2.17461	0.00115037	24
1	QAPGTLFTFPWLT	342	W	1	1.93215	2.05641	1.99428	0.0878671	28
1	QAPGWLFTFPSLT	336	W	1	1.82662	1.98622	1.90642	0.112852	30
1	WAPGTLFTFPSLT	332	W	1	1.67467	1.58036	1.62751	0.066684	35
1	QAWGTLFTFPSLT	334	W	1	1.60218	1.57363	1.58791	0.0201832	38
1	QAPWTLFTFPSLT	335	W	1	1.60266	1.5159	1.55928	0.0613457	41
1	QAPGTLFTFPSWT	343	W	1	1.50952	1.33446	1.42199	0.123787	50
1	QAPGTLFTWPSLT	340	W	1	1.34603	1.45776	1.4019	0.0790027	52
1	QAPGTWFTFPSLT	337	W	1	1.12851	1.4414	1.28495	0.221243	59
1	QAPGTLFTFPSLW	344	W	1	1.19967	1.21344	1.20655	0.00973672	71
1	QAPGTLWTFPSLT	338	W	1	0.882316	0.701584	0.79195	0.127797	152
1	QAPGTLFYFPSLT	339	Y	1	2.22769	2.58978	2.40873	0.256043	20
1	QAPGTLFTFYSLT	341	Y	1	2.19305	2.05335	2.1232	0.0987787	26
1	QAYGTLFTFPSLT	334	Y	1	1.27176	1.2613	1.26653	0.00740066	62
1	QAPGTLFTYPSLT	340	Y	1	1.14624	1.09563	1.12093	0.0357813	83
1	QAPGTLFTFPYLT	342	Y	1	1.02427	1.19805	1.11116	0.122882	84
1	YAPGTLFTFPSLT	332	Y	1	1.13905	1.00176	1.0704	0.0970766	88
1	QAPGYLFTFPSLT	336	Y	1	0.850429	1.16403	1.00723	0.221751	100
1	QAPGTLYTFPSLT	338	Y	1	0.737185	1.08485	0.911016	0.245834	124
1	QAPYTLFTFPSLT	335	Y	1	0.841508	0.818559	0.830033	0.0162278	142
1	QAPGTLFTFPSLY	344	Y	1	0.680053	0.76754	0.723797	0.0618628	180
1	QAPGTYFTFPSLT	337	Y	1	0.684498	0.711167	0.697833	0.0188574	193
1	QYPGTLFTFPSLT	333	Y	1	0.709409	0.561635	0.635522	0.104491	214
1	QAPGTLFTFPSYT	343	Y	1	0.591323	0.555743	0.573533	0.0251588	236
1	QAPGTLFTFPSLT	335	syn	1	0.937873	0.753072	0.845472	0.130674	138	0.65323	0.101865
0	QAPGTLFTFPSLT	NA	syn	1	0.805536	0.805648	0.805592	7.95788e-05	150
1	QAPGTLFTFPSLT	344	syn	1	0.672693	0.814467	0.74358	0.100249	170
1	QAPGTLFTFPSLT	341	syn	1	0.721471	0.714479	0.717975	0.00494417	182
1	QAPGTLFTFPSLT	338	syn	1	0.760109	0.671453	0.715781	0.0626897	183
1	QAPGTLFTFPSLT	337	syn	3	0.635342	0.651535	0.643439	0.151558	211
1	QAPGTLFTFPSLT	334	syn	2	0.597481	0.630598	0.614039	0.0259438	222
1	QAPGTLFTFPSLT	343	syn	2	0.624462	0.578617	0.60154	0.0437852	226
1	QAPGTLFTFPSLT	333	syn	2	0.575348	0.597914	0.586631	0.0499996	232
1	QAPGTLFTFPSLT	336	syn	2	0.537484	0.589621	0.563552	0.094196	239
1	QAPGTLFTFPSLT	342	syn	3	0.593344	0.531037	0.562191	0.0633695	241
1	QAPGTLFTFPSLT	339	syn	1	0.541272	0.561382	0.551327	0.0142197	245
1	QAPGTLFTFPSLT	340	syn	1	0.516541	0.565197	0.540869	0.0344051	248

## Sheet: Matrix_Fig5D
Position	G	P	A	I	L	V	F	W	Y	M	C	S	T	N	Q	H	K	R	D	E	stop
Q332	0.868973	1.44445	0.833909	2.438	1.38837	1.41217	1.08444	1.62751	1.0704	0.886981	0.869582	0.733488	0.486253	0.846041	0.805592	0.669606	0.917075	1.2093	0.923749	0.698241	2.40165
A333	0.712642	0.84713	0.586631	1.01426	0.724076	0.756717	0.957314	3.23533	0.635522	0.571443	0.520387	0.698809	0.522431	0.721936	0.400742	0.420556	0.616711	1.2237	0.50583	0.516637	3.29629
P334	0.725783	0.614039	0.617244	0.922052	1.21668	0.536982	1.57103	1.58791	1.26653	0.771977	0.560274	0.562581	0.591409	0.634948	0.688559	0.912396	0.820995	1.00195	0.584718	0.574081	3.16317
G335	0.845472	0.868226	0.627037	0.788888	0.96021	1.10795	1.06023	1.55928	0.830033	2.92005	0.456885	0.836459	0.657129	1.08527	0.541175	0.823379	1.22251	1.53592	0.390464	0.356725	2.69479
T336	0.595416	0.707682	0.604689	1.14392	0.890207	0.820781	1.20874	1.90642	1.00723	0.75888	0.522406	0.495573	0.563552	0.673079	0.698086	0.689556	1.17376	1.26978	1.19387	0.731113	2.7803
L337	0.474588	0.594233	0.591871	0.334013	0.643439	0.36752	1.12206	1.28495	0.697833	0.461825	1.62128	0.55816	0.410648	0.881384	0.777229	0.651735	1.45053	1.24664	0.413404	0.521632	1.38639
F338	0.64992	0.730878	0.867889	1.13519	0.77475	0.768014	0.715781	0.79195	0.911016	0.788536	0.713468	0.790732	0.769757	0.630185	0.777734	1.39012	4.2565	1.30296	1.65941	0.550843	2.67794
T339	0.552048	0.703626	1.01978	1.14096	0.99355	1.21413	1.63401	2.17461	2.40873	0.749928	1.39	0.665506	0.551327	0.731196	0.622116	0.828508	1.53569	2.62462	0.604946	0.671621	4.29713
F340	1.03435	1.05033	0.953849	1.00619	0.995089	1.24093	0.540869	1.4019	1.12093	1.16255	1.18147	0.772237	0.702666	0.790213	0.964081	1.02778	1.52487	1.57214	0.925738	0.960558	2.5785
P341	0.478978	0.717975	1.15522	2.303	1.95999	1.33573	2.82897	3.59884	2.1232	1.80459	0.967353	0.768948	0.947579	0.862009	2.49085	1.27767	2.10959	1.61613	0.820386	0.787402	4.06475
S342	0.595503	0.68037	0.800261	0.96731	1.16519	1.04088	2.2219	1.99428	1.11116	0.913283	0.832001	0.562191	1.69679	0.959507	0.689645	0.91695	1.48819	2.14936	0.725303	0.921244	2.65224
L343	0.74272	0.678516	0.694508	0.703232	0.60154	0.413678	0.663226	1.42199	0.573533	1.03952	0.665932	0.616465	1.00748	0.478364	0.603204	0.815619	0.945021	0.969403	0.755812	0.866876	6.98785
T344	0.667898	0.642994	0.647824	0.87725	1.1355	0.877923	1.05542	1.20655	0.723797	0.812911	0.72943	0.643064	0.74358	0.565419	0.540141	1.55031	1.05304	1.55855	0.586315	0.466017	2.4307
	NB: WT (synonymous) are in bold

## Sheet: By position
WT	Q332	A333	P334	G335	T336	L337	F338	T339	F340	P341	S342	L343	T344
0.805592	0.868973	0.712642	0.725783		0.595416	0.474588	0.64992	0.552048	1.03435	0.478978	0.595503	0.74272	0.667898
0.586631	1.44445	0.84713		0.868226	0.707682	0.594233	0.730878	0.703626	1.05033		0.68037	0.678516	0.642994
0.614039	0.833909		0.617244	0.627037	0.604689	0.591871	0.867889	1.01978	0.953849	1.15522	0.800261	0.694508	0.647824
0.845472	2.438	1.01426	0.922052	0.788888	1.14392	0.334013	1.13519	1.14096	1.00619	2.303	0.96731	0.703232	0.87725
0.563552	1.38837	0.724076	1.21668	0.96021	0.890207		0.77475	0.99355	0.995089	1.95999	1.16519		1.1355
0.643439	1.41217	0.756717	0.536982	1.10795	0.820781	0.36752	0.768014	1.21413	1.24093	1.33573	1.04088	0.413678	0.877923
0.715781	1.08444	0.957314	1.57103	1.06023	1.20874	1.12206		1.63401		2.82897	2.2219	0.663226	1.05542
0.551327	1.62751	3.23533	1.58791	1.55928	1.90642	1.28495	0.79195	2.17461	1.4019	3.59884	1.99428	1.42199	1.20655
0.540869	1.0704	0.635522	1.26653	0.830033	1.00723	0.697833	0.911016	2.40873	1.12093	2.1232	1.11116	0.573533	0.723797
0.717975	0.886981	0.571443	0.771977	2.92005	0.75888	0.461825	0.788536	0.749928	1.16255	1.80459	0.913283	1.03952	0.812911
0.562191	0.869582	0.520387	0.560274	0.456885	0.522406	1.62128	0.713468	1.39	1.18147	0.967353	0.832001	0.665932	0.72943
0.60154	0.733488	0.698809	0.562581	0.836459	0.495573	0.55816	0.790732	0.665506	0.772237	0.768948		0.616465	0.643064
0.74358	0.486253	0.522431	0.591409	0.657129		0.410648	0.769757		0.702666	0.947579	1.69679	1.00748
	0.846041	0.721936	0.634948	1.08527	0.673079	0.881384	0.630185	0.731196	0.790213	0.862009	0.959507	0.478364	0.565419
		0.400742	0.688559	0.541175	0.698086	0.777229	0.777734	0.622116	0.964081	2.49085	0.689645	0.603204	0.540141
	0.669606	0.420556	0.912396	0.823379	0.689556	0.651735	1.39012	0.828508	1.02778	1.27767	0.91695	0.815619	1.55031
	0.917075	0.616711	0.820995	1.22251	1.17376	1.45053	4.2565	1.53569	1.52487	2.10959	1.48819	0.945021	1.05304
	1.2093	1.2237	1.00195	1.53592	1.26978	1.24664	1.30296	2.62462	1.57214	1.61613	2.14936	0.969403	1.55855
	0.923749	0.50583	0.584718	0.390464	1.19387	0.413404	1.65941	0.604946	0.925738	0.820386	0.725303	0.755812	0.586315
	0.698241	0.516637	0.574081	0.356725	0.731113	0.521632	0.550843	0.671621	0.960558	0.787402	0.921244	0.866876	0.466017
Holm-Sidak's multiple comparisons test	Mean Diff.	Significant?	Summary	Adjusted P Value
WT vs. Q332	-0.4209	No	ns	0.0529
WT vs. A333	-0.1679	No	ns	0.6301
WT vs. P334	-0.1967	No	ns	0.3541
WT vs. G335	-0.3272	No	ns	0.3147
WT vs. T336	-0.2463	No	ns	0.215
WT vs. L337	-0.1079	No	ns	0.6301
WT vs. F338	-0.4131	Yes	**	0.0024
WT vs. T339	-0.5186	No	ns	0.0617
WT vs. F340	-0.4198	Yes	***	0.0004
WT vs. P341	-0.9382	Yes	*	0.0283
WT vs. S342	-0.4978	Yes	*	0.0387
WT vs. L343	-0.1181	No	ns	0.3541
WT vs. T344	-0.2068	Yes	*	0.0447

## Sheet: By amino acid
WT	G	P	A	I	L	V	F	W	Y	M	C	S	T	N	Q	H	K	R	D	E	stop
0.805592	0.868973	1.44445	0.833909	2.438	1.38837	1.41217	1.08444	1.62751	1.0704	0.886981	0.869582	0.733488	0.486253	0.846041		0.669606	0.917075	1.2093	0.923749	0.698241	2.40165
0.586631	0.712642	0.84713	0.617244	1.01426	0.724076	0.756717	0.957314	3.23533	0.635522	0.571443	0.520387	0.698809	0.522431	0.721936	0.400742	0.420556	0.616711	1.2237	0.50583	0.516637	3.29629
0.614039	0.725783	0.868226	0.627037	0.922052	1.21668	0.536982	1.57103	1.58791	1.26653	0.771977	0.560274	0.562581	0.591409	0.634948	0.688559	0.912396	0.820995	1.00195	0.584718	0.574081	3.16317
0.845472	0.595416	0.707682	0.604689	0.788888	0.96021	1.10795	1.06023	1.55928	0.830033	2.92005	0.456885	0.836459	0.657129	1.08527	0.541175	0.823379	1.22251	1.53592	0.390464	0.356725	2.69479
0.563552	0.474588	0.594233	0.591871	1.14392	0.890207	0.820781	1.20874	1.90642	1.00723	0.75888	0.522406	0.495573		0.673079	0.698086	0.689556	1.17376	1.26978	1.19387	0.731113	2.7803
0.643439	0.64992	0.730878	0.867889	0.334013		0.36752	1.12206	1.28495	0.697833	0.461825	1.62128	0.55816	0.410648	0.881384	0.777229	0.651735	1.45053	1.24664	0.413404	0.521632	1.38639
0.715781	0.552048	0.703626	1.01978	1.13519	0.77475	0.768014		0.79195	0.911016	0.788536	0.713468	0.790732	0.769757	0.630185	0.777734	1.39012	4.2565	1.30296	1.65941	0.550843	2.67794
0.551327	1.03435	1.05033	0.953849	1.14096	0.99355	1.21413	1.63401	2.17461	2.40873	0.749928	1.39	0.665506		0.731196	0.622116	0.828508	1.53569	2.62462	0.604946	0.671621	4.29713
0.540869	0.478978	0.68037	1.15522	1.00619	0.995089	1.24093		1.4019	1.12093	1.16255	1.18147	0.772237	0.702666	0.790213	0.964081	1.02778	1.52487	1.57214	0.925738	0.960558	2.5785
0.717975	0.595503	0.678516	0.800261	2.303	1.95999	1.33573	2.82897	3.59884	2.1232	1.80459	0.967353	0.768948	0.947579	0.862009	2.49085	1.27767	2.10959	1.61613	0.820386	0.787402	4.06475
0.562191	0.74272	0.642994	0.694508	0.96731	1.16519	1.04088	2.2219	1.99428	1.11116	0.913283	0.832001		1.69679	0.959507	0.689645	0.91695	1.48819	2.14936	0.725303	0.921244	2.65224
0.60154	0.667898		0.647824	0.703232		0.413678	0.663226	1.42199	0.573533	1.03952	0.665932	0.616465	1.00748	0.478364	0.603204	0.815619	0.945021	0.969403	0.755812	0.866876	6.98785
0.74358				0.87725	1.1355	0.877923	1.05542	1.20655	0.723797	0.812911	0.72943	0.643064		0.565419	0.540141	1.55031	1.05304	1.55855	0.586315	0.466017	2.4307
Holm-Sidak's multiple comparisons test	Mean Diff.	Significant?	Summary	Adjusted P Value
WT vs. G	-0.02167	No	ns	0.9094
WT vs. P	-0.1603	No	ns	0.3353
WT vs. A	-0.1313	No	ns	0.3908
WT vs. I	-0.4833	No	ns	0.1209
WT vs. L	-0.4562	Yes	*	0.0128
WT vs. V	-0.2616	No	ns	0.1709
WT vs. F	-0.7474	Yes	*	0.0444
WT vs. W	-1.177	Yes	**	0.0042
WT vs. Y	-0.4606	No	ns	0.1709
WT vs. M	-0.3962	No	ns	0.3191
WT vs. C	-0.1953	No	ns	0.5232
WT vs. S	-0.02527	No	ns	0.8414
WT vs. T	-0.126	No	ns	0.8414
WT vs. N	-0.1052	No	ns	0.3353
WT vs. Q	-0.1629	No	ns	0.8414
WT vs. H	-0.2679	No	ns	0.1171
WT vs. K	-0.8171	No	ns	0.1107
WT vs. R	-0.8299	Yes	**	0.0012
WT vs. D	-0.1229	No	ns	0.8213
WT vs. E	-0.01008	No	ns	0.9094
WT vs. stop	-2.532	Yes	***	0.0006
