# Supplementary material for: Mutational resilience of antiviral restriction favors primate TRIM5α in host-virus evolutionary arms races
Source: eLife. 2020 Sep 15;9:e59988. doi: 10.7554/eLife.59988 (PMC7492085; doi:10.7554/eLife.59988)
Supplement: Figure 5—source data 2. [file elife-59988-fig5-data2.xlsx]

## Sheet: Summary
		HIV-1 Fold restriction
Enrichment	Rhesus TRIM5 variant	1/28/19	2/1/19		2/11/19		2019-02-15	2019-02-19	3/29/19
0.466017	T344E	203.73	93.97		119.82		131.734
0.478978	P341G				106.93		204.138	50.267	107.298
0.516637	A333E				75.22		124.277	43.3527
0.595503	S342G				163.49		286.521
0.622116	T339Q				41.58		80.9654		57.2672
0.65323	WT	134.66	65.99		112.67	110.05	196.389	65.9519
0.698086	T336Q	130.54	97.92		95.89		149.723
0.698241	Q332E				107.79		170.189
0.771977	P334M				38.6		70.0391
0.777734	F338Q				41.33		17.4679	30.9925
0.788888	G335I		24.52	20.47	21.11		36.346
0.881384	L337N	76.91	90.04		73.18		150.166
0.925738	F340D				24.77		51.2401		75.9477
1.63401	T339F	10.37	13.51	12.39	12.27		17.2513
2.10959	P341K	16.06	18.62		20.89		29.7775
2.303	P341I	5.67	8.87		9.35		9.94862
2.4307	T344stop								1.97	1.3
4.2565	F338K	24.48	27.7		27.37		39.2418

## Sheet: 1-28-19
Raw data
Viral dose (uL)	Empty	WT	T336Q	L337N	F338K	T339F	P341I	P341K	T344E
50*	99.4*	15.2*	24.3*	29.4*	37.9*	64.7*	80.8*	50.7*	18.9*
16.6667	86.1*	2.24	2.93	3.75	9.9	17.8	33.8	14.1	2.49
5.55556	56.2*	0.7	1.13	1.23	3.26	6.63	13.8	4.77	1.04
1.85185	34.3	0.32	0.79	0.73	1.47	3.16	6.58	2.15	0.67
0.617284	11.9	0.11*	0.32	0.23	0.58	1.52	2.38	0.78	0.36
0.205761	2.47	0.027*	0.14*	0.038*	0.13*	0.5	0.41	0.21	0.1*
0.0685871	0.89	0.013*	0.056*	0*	0.038*	0.12*	0.099*	0.11*	0.12*
0*	0.027*	0.014*	0.19*	0*	0.013*	0.18*	0.055*	0.013*	0.11*
Log-transformed data
Viral dose (uL)	Empty	WT	T336Q	L337N	F338K	T339F	P341I	P341K	T344E
1.22185		0.350248	0.466868	0.574031	0.995635	1.25042	1.52892	1.14922	0.396199
0.744727		-0.154902	0.0530784	0.0899051	0.513218	0.821514	1.13988	0.678518	0.0170333
0.267606	1.53529	-0.49485	-0.102373	-0.136677	0.167317	0.499687	0.818226	0.332438	-0.173925
-0.209515	1.07555		-0.49485	-0.638272	-0.236572	0.181844	0.376577	-0.107905	-0.443697
-0.686636	0.392697					-0.30103	-0.387216	-0.677781
-1.16376	-0.05061
Linear regression
	Empty	WT	T336Q	L337N	F338K	T339F	P341I	P341K	T344E
Best-fit values ± SE
Slope	1.14	0.8856	0.6373	0.8098	0.8473	0.7844	0.9632	0.9307	0.5681
Y-intercept	1.249	-0.7594	-0.3419	-0.4376	-0.06896	0.2806	0.4375	0.02584	-0.3387
log(x) for log(y) = 0.699	-0.482482	1.64676	1.63325	1.40352	0.906326	0.533363	0.27146	0.723251	1.82656
x when y = 5	0.329244	44.3363	42.9783	25.3232	8.05983	3.41478	1.86836	5.28751	67.0752
fold inhibition	1	134.661	130.537	76.9134	24.4798	10.3716	5.67469	16.0596	203.725

## Sheet: 2-1-19
Raw data
Viral dose (uL)	Empty	WT	G335I	G335I (2nd transduction)	T336Q	L337N	F338K	T339F	T339F (2nd transduction)	P341F	P341K	T344E
31.25	95.7*	9.14	21.9	21.9	5.21	5.5	17.5	34.9	29.4	46.2	25.9	5.57
10.4167	76.1*	1.47	4.98	7.39	1.14	1.22	5.89	11.5	9.04	16.3	7.15	1
3.47222	44.3	0.75	1.73	2.46	0.4	0.32	1.73	3.89	3.22	5.95	2.49	0.32
1.15741	23.7	0.2*	1.08	1.09	0.25*	0.14*	0.64	1.46	2.29	2.73	1.23	0.1*
0.385802	7.43	0.12*	0.36	0.3	0.13*	0.18*	0.092*	0.39	0.85	0.58	0.4	0.086*
0.128601	1.5	0*	0.11*	0.17*	0.016*	0.051*	0.09*	0.2*	0.15*	0.16*	0.21*	0.071*
0.0428669	0.64	0.035*	0.063*	0.057*	0.016*	0.034*	0.091*	0.058*	0.12*	0.053*	0.032*	0.071*
0	0.016*	0.017*	0.051*	0.062*	0.05*	0*	0.016*	0.033*	0.1*	0.071*	0.052*	0.13*
Log-transformed data
Viral dose (uL)	Empty	WT	G335I	G335I (2nd transduction)	T336Q	L337N	F338K	T339F	T339F (2nd transduction)	P341F	P341K	T344E
1.49485		0.960946	1.34044	1.34044	0.716838	0.740363	1.24304	1.54283	1.46835	1.66464	1.4133	0.745855
1.01773		0.167317	0.697229	0.868644	0.0569049	0.0863598	0.770115	1.0607	0.956168	1.21219	0.854306	0
0.540608	1.6464	-0.124939	0.238046	0.390935	-0.39794	-0.49485	0.238046	0.58995	0.507856	0.774517	0.396199	-0.49485
0.0634863	1.37475		0.0334238	0.0374265			-0.19382	0.164353	0.359835	0.436163	0.0899051
-0.413635	0.870989		-0.443697	-0.522879				-0.408935	-0.0705811	-0.236572	-0.39794
-0.890756	0.176091
-1.36788	-0.19382
Linear regression
	Empty	WT	G335I	G335I (2nd transduction)	T336Q	L337N	F338K	T339F	T339F (2nd transduction)	P341F	P341K	T344E
Slope	1.023	1.138	0.887	0.9553	1.168	1.294	1.015	1.006	0.7701	0.9596	0.9194	1.3
Y-intercept	1.198	-0.8237	-0.1064	-0.09352	-1.064	-1.207	-0.2765	0.04592	0.228	0.2514	-0.02591	-1.24
log(x) for log(y) = 0.699	-0.48781	1.33802	0.907971	0.829572	1.50939	1.47293	0.961054	0.649155	0.61157	0.466413	0.788427	1.49152
x when y = 5	0.325229	21.7782	8.09041	6.75417	32.3141	29.7118	9.14227	4.45815	4.08856	2.92694	6.14366	31.011
fold inhibition	0.985543	65.9947	24.5164	20.4672	97.9215	90.0357	27.7039	13.5096	12.3896	8.8695	18.6172	93.9726

## Sheet: 2-11-19
Raw data
Viral dose (uL)	Empty		Empty (2nd transduction)		WT		WT (2nd transduction)		T336Q		L337N		F338K		T339F		P341I		P341K		T344E		Q332E		P334M		T339Q		F340D		S342G		G335I		A333E		F338Q		P341G
6.25		93.5*	96.1*	92.4*	4.82	3.91	5.54	4.15	6	4.46	6.87	7.12	10.7*	15.8	32.2	27.1	44.3	33.2	25.9	20.3	5.1	3.66	5.76	4.47	11.2	10.2	9.03*	10.1	10.5*	15.7	3.86	3.54	23.9	17.7	7.22	6.21	12.2	10.7	5.74	4.29
2.08333	76.8*	68.1*	73.3*	71.5*	2.38	1.33	2.07	1.64	1.8	1.57	2.1	2.07	5.78	5.49	12.8	11.6	13.9	14.8	8.33	6.43	1.62	1.26	2.25	1.61	3.93	4.12	4.31	3.34	6.38	5.29	1.78	1.41	7.37	6.47	2.74	1.67	3.52	3.6	1.68	1.7
0.694444	41.8	40.1	36.6	38.4	0.59	0.74	0.83	0.73	0.53	0.55	1.15	1.25	2.3	2.27	3.77	4.63	5.86	5.3	2.68	3.51	0.51	0.62	1.23	1.09	1.82	1.81	1.73	2.44	2.44	2.76	0.71	0.99	2.56	2.84	0.97	2.62	2.28	1.26	0.94	0.68
0.231481	16.2	17.9	14.4	15.4	0.24	0.25	0.53	0.23	0.47*	0.29*	0.5	0.29	0.84	0.91	2.12	1.95	2.4	2.05	0.89	0.82	0.42*	0.23*	0.58	0.41	1.18	1.12	1.08	0.71	1.43	0.92	0.62*	0.62*	0.95	1.39	0.49	0.69	0.94	0.5	0.44*	0.64*
0.0771605	6.05	6.11	6.01	5.26	0.25*	0.29*	0.18*	0.18*	0.25*	0.2*	0.26*	0.23*	0.65*	0.46*	0.63	0.66	0.83	1.03	0.42*	1.01*	0.31*	0.33*	0.45*	0.45*	0.5	0.3	0.58	0.48	0.56	0.44	0.5*	0.54*	0.71*	0.67*	0.21	0.33	0.47*	0.15*	0.19*	0.28*
Log-transformed data
Viral dose (uL)	Empty		Empty (2nd transduction)		WT		WT (2nd transduction)		T336Q		L337N		F338K		T339F		P341I		P341K		T344E		Q332E		P334M		T339Q		F340D		S342G		G335I		A333E		F338Q		P341G
0.79588					0.683047	0.592177	0.74351	0.618048	0.778151	0.649335	0.836957	0.85248		1.19866	1.50786	1.43297	1.6464	1.52114	1.4133	1.3075	0.70757	0.563481	0.760422	0.650308	1.04922	1.0086		1.00432		1.1959	0.586587	0.549003	1.3784	1.24797	0.858537	0.793092	1.08636	1.02938	0.758912	0.632457
0.318759					0.376577	0.123852	0.31597	0.214844	0.255273	0.1959	0.322219	0.31597	0.761928	0.739572	1.10721	1.06446	1.14301	1.17026	0.920645	0.808211	0.209515	0.100371	0.352183	0.206826	0.594393	0.614897	0.634477	0.523746	0.804821	0.723456	0.25042	0.149219	0.867467	0.810904	0.437751	0.222716	0.546543	0.556303	0.225309	0.230449
-0.158362	1.62118	1.60314	1.56348	1.58433	-0.229148	-0.130768	-0.0809219	-0.136677	-0.275724	-0.259637	0.0606978	0.09691	0.361728	0.356026	0.576341	0.665581	0.767898	0.724276	0.428135	0.545307	-0.29243	-0.207608	0.0899051	0.0374265	0.260071	0.257679	0.238046	0.38739	0.38739	0.440909	-0.148742	-0.00436481	0.40824	0.453318	-0.0132283	0.418301	0.357935	0.100371	-0.0268721	-0.167491
-0.635484	1.20952	1.25285	1.15836	1.18752	-0.619789	-0.60206	-0.275724	-0.638272			-0.30103	-0.537602	-0.0757207	-0.0409586	0.326336	0.290035	0.380211	0.311754	-0.05061	-0.0861861			-0.236572	-0.387216	0.071882	0.049218	0.0334238	-0.148742	0.155336	-0.0362122			-0.0222764	0.143015	-0.309804	-0.161151	-0.0268721	-0.30103
-1.11261	0.781755	0.786041	0.778874	0.720986											-0.200659	-0.180456	-0.0809219	0.0128372							-0.30103	-0.522879	-0.236572	-0.318759	-0.251812	-0.356547					-0.677781	-0.481486
Linear regression
	Empty	Empty (2nd transduction)	WT	WT (2nd transduction)	T336Q	L337N	F338K	T339F	P341I	P341K	T344E	Q332E	P334M	T339Q	F340D	S342G	G335I	A333E	F338Q	P341G
Best-fit values
Slope	0.868	0.8635	0.8752	0.7938	1.028	0.8452	0.8725	0.8592	0.8481	0.9775	0.928	0.6849	0.718	0.6708	0.7765	0.6752	0.8733	0.7077	0.8358	0.8309
Y-intercept	1.761	1.714	-0.04595	0.03143	-0.104	0.138	0.4925	0.795	0.894	0.5824	-0.1157	0.1292	0.4219	0.4184	0.5489	0.01511	0.5908	0.2208	0.3516	0.01061
log(x) for log(y) = 0.699	-1.22354	-1.17548	0.851143	0.840942	0.781099	0.663713	0.236642	-0.111767	-0.229961	0.119253	0.877877	0.831902	0.385891	0.418262	0.193265	1.01283	0.123864	0.675668	0.415614	0.828451
x when y = 5	0.0597672	0.06676	7.09811	6.93334	6.04087	4.61013	1.72442	0.773096	0.588896	1.31599	7.54879	6.79051	2.4316	2.61976	1.5605	10.2997	1.33004	4.73879	2.60384	6.73676
fold inhibition	0.948686	1.05968	112.668	110.053	95.8868	73.1766	27.3717	12.2714	9.34756	20.8888	119.822	107.786	38.5968	41.5835	24.7699	163.488	21.1117	75.2189	41.3307	106.933
(Empty average)	0.0632636

## Sheet: 2-15-19
Raw Data
Viral Dose (ul)	Empty vector		Rhesus WT		Rh T336Q		Rh L337N		Rh F338K		Rh T339F		Rh P341I		Rh P341K		Rh T344E		Rh Q332E		Rh P334M		Rh T339Q		Rh F340D		Rh S342G		Rh G335I		Rh A333E		Rh F338Q		Rh P341G
6.25	89.8*	90.6*	3.31	4.08	4.57	5.47	4.51	4.93	15.3	15.6	31.5	33.1	38.7*	37.9*	22*	23.9*	5.47	5.83	3.99	4.09	8.6	9.53	7.4	9.07	10.1	13.5	2.56	3.13	13.1	17.5	6.38	4.83	8.76*	15.7*	2.49	5.32
2.0833	62.2*	62.6*	1.39	1.23	1.28	1.68	1.58	1.41	5.83	5.66	12	11.9	13.4*	14.3*	8.3	7.65	1.78	1.57	1.97	1.49	3.29	3.3	2.8	3.32	3.99	4.38	1.33	1.05	6.12	6.16	2.23	2	10.25	14.01	0.77	1.87
0.6944	36.2	37	0.39	0.62	0.6	0.71	0.54	0.52	2.08	1.98	4.54	4.09	5.53*	4.69*	2.86	2.51	0.76	0.78	0.55	0.63	1.33	1.81	1.22	1.27	1.92	2.21	0.57	0.74	2.56	2.71	0.93	0.78	4.1	4.1	0.36	0.66
0.2315	17.4	17.8	0.36*	0.22*	0.23*	0.56*	0.31*	0.27*	0.86	0.98	1.64	1.56	3.04	2.88	1.14	1.01	0.34*	0.67*	0.26*	0.35*	0.57	0.78	0.81	0.51	0.55	0.99	0.23	0.2	0.88	0.92	0.57*	0.41*	1.9	1.92	0.35*	0.38*
0.0772	8.15	7.26	0.13*	0.19*	0.29*	0.29*	0.22*	0.33*	0.49*	0.65*	0.93	0.56	1.11	1.62	0.48	0.72	0.23*	0.41*	0.31*	0.29*	0.37*	0.5*	0.26*	0.13*	0.27*	0.5*	0.2*	0.3*	0.58*	0.56*	0.31*	0.26*	0.55	0.75	0.18*	0.28*
0.0257	3.32	3.05	0.13*	0.054*	0.23*	0.4*	0.15*	0.23*	0.38*	0.65*	0.5*	0.23*	0.71	0.42	0.25*	0.21*	0.34*	0.32*	0.25*	0.14*	0.18*	0.42*	0.12*	0.24*	0.25*	0.34*	0.17*	0.27*	0.28*	0.31*	0.27*	0.24*	0.49*	0.55*	0.27*	0.22*
Log transformed data
Viral Dose (ul)	Empty vector		Rhesus WT		Rh T336Q		Rh L337N		Rh F338K		Rh T339F		Rh P341I		Rh P341K		Rh T344E		Rh Q332E		Rh P334M		Rh T339Q		Rh F340D		Rh S342G		Rh G335I		Rh A333E		Rh F338Q		Rh P341G
0.79588			0.519828	0.61066	0.659916	0.737987	0.654177	0.692847	1.18469	1.19312	1.49831	1.51983					0.737987	0.765669	0.600973	0.611723	0.934498	0.979093	0.869232	0.957607	1.00432	1.13033	0.40824	0.495544	1.11727	1.24304	0.804821	0.683947			0.396199	0.725912
0.318752			0.143015	0.0899051	0.10721	0.225309	0.198657	0.149219	0.765669	0.752816	1.07918	1.07555			0.919078	0.883661	0.25042	0.1959	0.294466	0.173186	0.517196	0.518514	0.447158	0.521138	0.600973	0.641474	0.123852	0.0211893	0.786751	0.789581	0.348305	0.30103	1.01072	1.14644	-0.113509	0.271842
-0.15839	1.55871	1.5682	-0.408935	-0.207608	-0.221849	-0.148742	-0.267606	-0.283997	0.318063	0.296665	0.657056	0.611723			0.456366	0.399674	-0.119186	-0.107905	-0.259637	-0.200659	0.123852	0.257679	0.0863598	0.103804	0.283301	0.344392	-0.244125	-0.130768	0.40824	0.432969	-0.0315171	-0.107905	0.612784	0.612784	-0.443697	-0.180456
-0.635449	1.24055	1.25042							-0.0655015	-0.00877392	0.214844	0.193125	0.482874	0.459392	0.0569049	0.00432137					-0.244125	-0.107905	-0.091515	-0.29243	-0.259637	-0.00436481	-0.638272	-0.69897	-0.0555173	-0.0362122			0.278754	0.283301
-1.11238	0.911158	0.860937									-0.0315171	-0.251812	0.045323	0.209515	-0.318759	-0.142668																	-0.259637	-0.124939
-1.59007	0.521138	0.4843											-0.148742	-0.376751
Linear regression
	Empty vector	Rhesus WT	Rh T336Q	Rh L337N	Rh F338K	Rh T339F	Rh P341I	Rh P341K	Rh T344E	Rh Q332E	Rh P334M	Rh T339Q	Rh F340D	Rh S342G	Rh G335I	Rh A333E	Rh F338Q	Rh P341G
Best-fit values
Slope	0.7422	0.9154	0.9266	0.9948	0.8656	0.8751	0.7688	0.7952	0.9068	0.8766	0.7808	0.7766	0.8185	0.759	0.8479	0.8531	0.8688	0.915
Y-intercept	1.698	-0.1673	-0.06872	-0.1265	0.4852	0.7952	0.9673	0.5979	-0.001906	-0.07607	0.3097	0.2629	0.402	-0.1438	0.5178	0.06119	0.7898	-0.1823
log(x) for log(y) = 0.699	-1.34604	0.946329	0.828502	0.829785	0.246962	-0.109965	-0.349024	0.1271	0.772911	0.884143	0.498553	0.561512	0.362822	1.11037	0.213669	0.747603	-0.104547	0.963137
x when y = 5	0.0450776	8.8375	6.73755	6.75748	1.76588	0.77631	0.447688	1.33999	5.92804	7.65849	3.15176	3.64344	2.3058	12.8934	1.63557	5.59246	0.786056	9.18622
fold inhibition	1.00173	196.389	149.723	150.166	39.2418	17.2513	9.94862	29.7775	131.734	170.189	70.0391	80.9654	51.2401	286.521	36.346	124.277	17.4679	204.138

## Sheet: 2-19-19
Raw data
Viral Dose (ul)	Empty vector		Rhesus WT		Rh A333E		Rh F338Q		Rh P341G
6.25	93.7*	96.13*	5.31	5.99	9.29	7.9	12.3	10.93	7.49	8.8
2.5	57.6*	65.2*	0.89	0.77	2.3	2.06	2.8	3.11	1.12	2.03
1	35.1	37.9	0.43	0.55	1.11	1.06	1.84	1.49	1.06	0.98
0.4	15	17.5	0.22*	0.49*	0.47	0.72	0.99	0.46	0.49	0.39
0.16	6.3	7.91	0.35*	0.44*	0.45*	0.66*	0.78*	0.25*	0.15*	0.14*
0.064	3.7	3.12	0.11*	0.08*	0.22*	0.39*	0.42*	0.23*	0.11*	0.1*
Log transformed data
Viral Dose (ul)	Empty vector		Rhesus WT		Rh A333E		Rh F338Q		Rh P341G
0.79588			0.725095	0.777427	0.968016	0.897627	1.08991	1.03862	0.874482	0.944483
0.39794			-0.05061	-0.113509	0.361728	0.313867	0.447158	0.49276	0.049218	0.307496
0	1.54531	1.57864	-0.366532	-0.259637	0.045323	0.0253059	0.264818	0.173186	0.0253059	-0.00877392
-0.39794	1.17609	1.24304			-0.327902	-0.142668	-0.00436481	-0.337242	-0.309804	-0.408935
-0.79588	0.799341	0.898176
-1.19382	0.568202	0.494155
Linear regression
	Empty vector	Rh WT	Rh A333E	Rh F338Q	Rh P341G
Best-fit values
Slope	0.8678	1.337	0.9566	0.9942	0.9993
Y-intercept	1.556	-0.4135	0.07732	0.1978	-0.01465
log(x) for log(y) = 0.699	-0.987589	0.832064	0.649854	0.504094	0.71412
x when y = 5	0.102899	6.79304	4.46533	3.19223	5.1775
fold inhibition	0.999018	65.9519	43.3527	30.9925	50.267

## Sheet: 3-28-19
Raw data
Viral Dose (ul)	Empty vector		T339Q		F340D		P341G		T344 Stop		T344stop (2nd transduction)
6.25	82.7*	94.7*	4.86*	8.44*	7.59*	6.86*	3.57*	4.29*	85*	86.9*	89*	91.9*
2.5	82.9*	70.6*	3.53*	4.13*	3.58	3.96	2.27	2.33	58.9*	60.3*	71.4*	68.9*
1	58.6*	54.5*	2.21	2.23	1.62	1.76	1.26	1.34	34.5	39.9	47.6	46.2
0.4	32.4	31.4	1.04	0.91	0.44	0.69	0.36	0.25	17.7	21.9	23.4	26.9
0.16	15.9	15.7	0.33	0.48	0.51*	0.91*	0.2*	0.17*	8.67	9.29	9.81	16.85
0.064	6.8	7.4	0.35*	1.39*	0.21*	0.85*	0.088*	0.38*	3.42	4.65	4.91	5.88
Log transformed data
Viral Dose (ul)	Empty vector		T339Q		F340D		P341G		T344 Stop		T344stop (2nd transduction)
0.79588
0.39794					0.553883	0.597695	0.356026	0.367356
0			0.344392	0.348305	0.209515	0.245513	0.100371	0.127105	1.53782	1.60097	1.67761	1.66464
-0.39794	1.51055	1.49693	0.0170333	-0.0409586	-0.356547	-0.161151	-0.443697	-0.60206	1.24797	1.34044	1.36922	1.42975
-0.79588	1.2014	1.1959	-0.481486	-0.318759					0.938019	0.968016	0.991669	1.2266
-1.19382	0.832509	0.869232							0.534026	0.667453	0.691081	0.769377
Linear regression
	Empty	T339Q	F340D	P341G	T344 Stop	T344stop (2nd transduction)
Best-fit values
Slope	0.8203	0.9379	1.049	1.111	0.816	0.7823
Y-intercept	1.837	0.3513	0.1815	-0.01582	1.591	1.694
log(x) for log(y) = 0.699	-1.38733	0.37069	0.493298	0.643375	-1.09317	-1.27193
x when y = 5	0.0409889	2.34796	3.11385	4.39922	0.0806912	0.0534652
fold inhibition	0.999729	57.2672	75.9477	107.298	1.96808	1.30403
