# Supplementary material for: Mutational resilience of antiviral restriction favors primate TRIM5α in host-virus evolutionary arms races
Source: eLife. 2020 Sep 15;9:e59988. doi: 10.7554/eLife.59988 (PMC7492085; doi:10.7554/eLife.59988)
Supplement: Figure 6—source data 1. [file elife-59988-fig6-data1.xlsx]

## Sheet: RhT5-NMLV-LOF_Replicates_Fig6A
dist_codon	seq_aa	mutcod_index	mut_aa	num_nt_seqs	enrichA_Avg	enrichB_Avg	enrich_Avg_RepAndAA	enrich_SD_RepAndAA	Rank	WT avg	WT SD
1	*APGTLFTFPSLT	332	STOP	1	2.04887	1.98225	2.01556	0.0471062	39
1	Q*PGTLFTFPSLT	333	STOP	1	2.81587	2.29593	2.5559	0.367647	16
1	QA*GTLFTFPSLT	334	STOP	1	3.48033	2.45657	2.96845	0.723911	8
1	QAP*TLFTFPSLT	335	STOP	1	2.97364	3.2088	3.09122	0.166283	4
1	QAPG*LFTFPSLT	336	STOP	1	2.7564	3.08798	2.92219	0.23446	9
1	QAPGT*FTFPSLT	337	STOP	1	1.38687	1.456	1.42144	0.0488794	68
1	QAPGTL*TFPSLT	338	STOP	1	1.2431	2.54025	1.89168	0.917223	48
1	QAPGTLF*FPSLT	339	STOP	1	2.67813	3.2896	2.98387	0.432373	7
1	QAPGTLFT*PSLT	340	STOP	1	2.20693	2.89404	2.55049	0.485857	17
1	QAPGTLFTF*SLT	341	STOP	1	3.72038	3.34663	3.5335	0.264285	1
1	QAPGTLFTFP*LT	342	STOP	1	2.24243	1.9931	2.11777	0.176301	37
1	QAPGTLFTFPS*T	343	STOP	1	2.56044	3.45469	3.00757	0.63233	6
1	QAPGTLFTFPSL*	344	STOP	1	2.98936	3.1668	3.07808	0.125472	5
1	AAPGTLFTFPSLT	332	A	2	1.11645	1.05892	1.08769	0.151747	93
1	QAAGTLFTFPSLT	334	A	2	0.727274	0.872343	0.799808	0.0956311	146
1	QAPATLFTFPSLT	335	A	2	0.667154	0.623471	0.645312	0.0416903	198
1	QAPGALFTFPSLT	336	A	2	1.01227	1.06147	1.03687	0.100061	103
1	QAPGTAFTFPSLT	337	A	2	0.661595	0.837894	0.749744	0.130951	164
1	QAPGTLATFPSLT	338	A	2	0.546214	0.608655	0.577434	0.0360938	222
1	QAPGTLFAFPSLT	339	A	2	0.636043	0.652514	0.644279	0.196442	200
1	QAPGTLFTAPSLT	340	A	2	0.686706	0.618144	0.652425	0.112155	195
1	QAPGTLFTFASLT	341	A	2	0.92243	0.910888	0.916659	0.100674	123
1	QAPGTLFTFPALT	342	A	2	0.784892	0.760707	0.772799	0.102689	155
1	QAPGTLFTFPSAT	343	A	2	0.68475	0.667627	0.676189	0.128339	183
1	QAPGTLFTFPSLA	344	A	2	0.609573	0.681944	0.645758	0.0991694	197
1	CAPGTLFTFPSLT	332	C	1	1.60628	1.54026	1.57327	0.04668	59
1	QCPGTLFTFPSLT	333	C	1	0.731797	0.848896	0.790347	0.0828018	148
1	QACGTLFTFPSLT	334	C	1	1.07906	0.990928	1.03499	0.0623189	104
1	QAPCTLFTFPSLT	335	C	1	0.79088	0.750959	0.770919	0.0282284	156
1	QAPGCLFTFPSLT	336	C	1	1.14496	0.844409	0.994683	0.21252	112
1	QAPGTCFTFPSLT	337	C	1	1.02745	1.06153	1.04449	0.0240973	100
1	QAPGTLCTFPSLT	338	C	1	0.574775	0.697188	0.635982	0.0865592	205
1	QAPGTLFCFPSLT	339	C	1	2.00576	1.85237	1.92906	0.108458	45
1	QAPGTLFTCPSLT	340	C	1	1.09665	1.11005	1.10335	0.00948044	89
1	QAPGTLFTFCSLT	341	C	1	1.33851	1.14622	1.24237	0.135968	78
1	QAPGTLFTFPCLT	342	C	1	1.27056	1.13939	1.20497	0.0927508	81
1	QAPGTLFTFPSCT	343	C	1	0.891204	0.657812	0.774508	0.165033	153
1	QAPGTLFTFPSLC	344	C	1	0.722454	0.73433	0.728392	0.00839797	169
1	DAPGTLFTFPSLT	332	D	1	0.474335	0.629621	0.551978	0.109804	233
1	QDPGTLFTFPSLT	333	D	1	0.749912	1.01769	0.8838	0.189347	128
1	QADGTLFTFPSLT	334	D	1	1.05278	0.932589	0.992684	0.0849881	114
1	QAPDTLFTFPSLT	335	D	1	0.707881	1.00053	0.854207	0.206936	135
1	QAPGDLFTFPSLT	336	D	1	0.966046	1.24305	1.10455	0.195875	88
1	QAPGTDFTFPSLT	337	D	1	0.677366	0.560422	0.618894	0.0826918	214
1	QAPGTLDTFPSLT	338	D	1	1.04786	1.47961	1.26373	0.305295	76
1	QAPGTLFDFPSLT	339	D	1	0.704766	0.579053	0.641909	0.0888929	202
1	QAPGTLFTDPSLT	340	D	1	1.10948	0.999163	1.05432	0.0780081	99
1	QAPGTLFTFDSLT	341	D	1	0.549538	0.450925	0.500232	0.0697299	254
1	QAPGTLFTFPDLT	342	D	1	0.529398	0.56576	0.547579	0.0257117	234
1	QAPGTLFTFPSDT	343	D	1	0.571674	0.578365	0.575019	0.00473096	223
1	QAPGTLFTFPSLD	344	D	1	0.463516	0.564025	0.51377	0.0710707	248
1	EAPGTLFTFPSLT	332	E	1	0.848104	0.638162	0.743133	0.148451	166
1	QEPGTLFTFPSLT	333	E	1	0.421344	0.454916	0.43813	0.0237392	266
1	QAEGTLFTFPSLT	334	E	1	0.683356	1.1098	0.896575	0.301538	126
1	QAPETLFTFPSLT	335	E	1	0.835171	1.092	0.963585	0.181605	118
1	QAPGELFTFPSLT	336	E	1	0.874323	1.17622	1.02527	0.213473	106
1	QAPGTEFTFPSLT	337	E	1	1.18985	1.0027	1.09627	0.132336	90
1	QAPGTLETFPSLT	338	E	1	1.6216	1.41519	1.5184	0.14596	63
1	QAPGTLFEFPSLT	339	E	1	0.929934	0.900322	0.915128	0.020939	124
1	QAPGTLFTEPSLT	340	E	1	1.79392	1.62757	1.71075	0.117625	54
1	QAPGTLFTFESLT	341	E	1	0.557331	0.58564	0.571485	0.0200174	225
1	QAPGTLFTFPELT	342	E	1	0.977163	1.03819	1.00768	0.0431535	109
1	QAPGTLFTFPSET	343	E	1	0.58707	0.489714	0.538392	0.0688411	238
1	QAPGTLFTFPSLE	344	E	1	0.830935	1.02404	0.927487	0.136545	121
1	FAPGTLFTFPSLT	332	F	1	2.69539	2.81103	2.75321	0.0817653	12
1	QFPGTLFTFPSLT	333	F	1	2.40835	2.64933	2.52884	0.170393	20
1	QAFGTLFTFPSLT	334	F	1	2.58263	2.6841	2.63337	0.0717513	14
1	QAPFTLFTFPSLT	335	F	1	1.84799	1.76864	1.80831	0.0561115	51
1	QAPGFLFTFPSLT	336	F	1	2.2733	2.07543	2.17437	0.13991	33
1	QAPGTFFTFPSLT	337	F	1	1.41428	1.2713	1.34279	0.101107	73
1	QAPGTLFFFPSLT	339	F	1	1.9892	1.85282	1.92101	0.0964345	46
1	QAPGTLFTFFSLT	341	F	1	2.57777	2.05156	2.31466	0.372089	26
1	QAPGTLFTFPFLT	342	F	1	2.32829	2.11878	2.22353	0.14815	31
1	QAPGTLFTFPSFT	343	F	1	1.16706	1.04378	1.10542	0.0871692	87
1	QAPGTLFTFPSLF	344	F	1	1.5764	1.49512	1.53576	0.0574779	62
1	GAPGTLFTFPSLT	332	G	2	1.26007	1.17676	1.21842	0.116906	79
1	QGPGTLFTFPSLT	333	G	2	0.780705	0.744853	0.762779	0.314704	159
1	QAGGTLFTFPSLT	334	G	2	0.457722	0.568114	0.512918	0.0662743	249
1	QAPGGLFTFPSLT	336	G	2	0.576638	0.547434	0.562036	0.0914957	228
1	QAPGTGFTFPSLT	337	G	2	0.492692	0.476295	0.484494	0.0613489	258
1	QAPGTLGTFPSLT	338	G	2	0.588568	0.489381	0.538974	0.0655838	237
1	QAPGTLFGFPSLT	339	G	2	0.511583	0.538167	0.524875	0.0471881	244
1	QAPGTLFTGPSLT	340	G	2	0.779112	0.759469	0.76929	0.202526	157
1	QAPGTLFTFGSLT	341	G	2	0.93851	0.834215	0.886363	0.238145	127
1	QAPGTLFTFPGLT	342	G	2	0.505146	0.551638	0.528392	0.0823275	242
1	QAPGTLFTFPSGT	343	G	2	0.853823	0.778676	0.816249	0.145779	144
1	QAPGTLFTFPSLG	344	G	2	0.529713	0.503006	0.516359	0.0232747	246
1	HAPGTLFTFPSLT	332	H	1	1.00252	1.08325	1.04288	0.0570817	101
1	QHPGTLFTFPSLT	333	H	1	0.958198	0.802767	0.880483	0.109906	129
1	QAHGTLFTFPSLT	334	H	1	0.917174	0.842538	0.879856	0.0527751	130
1	QAPHTLFTFPSLT	335	H	1	0.649568	0.639066	0.644317	0.00742629	199
1	QAPGHLFTFPSLT	336	H	1	0.728025	0.869135	0.79858	0.0997799	147
1	QAPGTHFTFPSLT	337	H	1	0.502043	0.517421	0.509732	0.0108741	251
1	QAPGTLHTFPSLT	338	H	1	0.823826	0.698578	0.761202	0.088564	160
1	QAPGTLFHFPSLT	339	H	1	1.17702	1.17047	1.17374	0.00463129	84
1	QAPGTLFTHPSLT	340	H	1	0.530081	0.58312	0.5566	0.037504	230
1	QAPGTLFTFHSLT	341	H	1	0.987789	0.875273	0.931531	0.0795605	120
1	QAPGTLFTFPHLT	342	H	1	1.13777	0.924294	1.03103	0.150953	105
1	QAPGTLFTFPSHT	343	H	1	0.770463	0.516585	0.643524	0.179519	201
1	QAPGTLFTFPSLH	344	H	1	0.899289	1.25719	1.07824	0.253075	97
1	IAPGTLFTFPSLT	332	I	1	2.01155	2.4544	2.23298	0.31314	29
1	QIPGTLFTFPSLT	333	I	1	1.4378	1.67944	1.55862	0.170859	61
1	QAIGTLFTFPSLT	334	I	1	1.09967	1.39776	1.24871	0.210784	77
1	QAPITLFTFPSLT	335	I	1	1.19276	1.59607	1.39441	0.285187	70
1	QAPGILFTFPSLT	336	I	1	2.12121	2.22091	2.17106	0.070503	35
1	QAPGTIFTFPSLT	337	I	1	0.645815	0.609248	0.627531	0.0258564	207
1	QAPGTLITFPSLT	338	I	1	1.73125	1.81786	1.77456	0.0612394	52
1	QAPGTLFIFPSLT	339	I	1	2.23319	2.32847	2.28083	0.0673704	27
1	QAPGTLFTIPSLT	340	I	1	0.464302	0.467685	0.465993	0.00239218	263
1	QAPGTLFTFISLT	341	I	1	2.07909	2.41086	2.24498	0.2346	28
1	QAPGTLFTFPILT	342	I	1	2.29923	2.0883	2.19376	0.149149	32
1	QAPGTLFTFPSIT	343	I	1	0.56525	0.778059	0.671654	0.150479	185
1	QAPGTLFTFPSLI	344	I	1	1.91628	1.44584	1.68106	0.332651	55
1	KAPGTLFTFPSLT	332	K	1	0.698993	0.704	0.701496	0.0035405	179
1	QKPGTLFTFPSLT	333	K	1	0.378141	0.322056	0.350098	0.0396587	272
1	QAKGTLFTFPSLT	334	K	1	0.356277	0.37627	0.366273	0.0141366	270
1	QAPKTLFTFPSLT	335	K	1	0.455871	0.377128	0.416499	0.0556795	267
1	QAPGKLFTFPSLT	336	K	1	0.527073	0.407018	0.467045	0.0848914	262
1	QAPGTKFTFPSLT	337	K	1	0.262906	0.3264	0.294653	0.0448966	273
1	QAPGTLKTFPSLT	338	K	1	0.511268	0.734117	0.622693	0.157578	211
1	QAPGTLFKFPSLT	339	K	1	0.368432	0.533653	0.451043	0.116828	264
1	QAPGTLFTKPSLT	340	K	1	0.481469	0.520415	0.500942	0.0275389	253
1	QAPGTLFTFKSLT	341	K	1	0.996733	1.1942	1.09547	0.13963	91
1	QAPGTLFTFPKLT	342	K	1	0.731272	0.842589	0.78693	0.0787129	150
1	QAPGTLFTFPSKT	343	K	1	0.536387	0.45572	0.496053	0.0570403	256
1	QAPGTLFTFPSLK	344	K	1	0.443349	0.576282	0.509816	0.0939976	250
1	LAPGTLFTFPSLT	332	L	3	2.44751	2.4718	2.45966	0.254492	24
1	QLPGTLFTFPSLT	333	L	3	1.04058	1.06967	1.05513	0.0977025	98
1	QALGTLFTFPSLT	334	L	3	1.53013	1.49305	1.51159	0.190927	64
1	QAPLTLFTFPSLT	335	L	3	1.45306	1.55071	1.50188	0.202226	65
1	QAPGLLFTFPSLT	336	L	3	0.815564	0.877659	0.846611	0.149894	139
1	QAPGTLLTFPSLT	338	L	3	0.768992	0.787353	0.778173	0.0379754	151
1	QAPGTLFLFPSLT	339	L	3	1.67871	1.81806	1.74838	0.160558	53
1	QAPGTLFTLPSLT	340	L	3	0.6839	0.624217	0.654059	0.125878	194
1	QAPGTLFTFLSLT	341	L	3	2.36723	2.09354	2.23039	0.273146	30
1	QAPGTLFTFPLLT	342	L	3	1.50363	1.44294	1.47329	0.163491	66
1	QAPGTLFTFPSLL	344	L	3	1.24442	1.16395	1.20418	0.235675	82
1	MAPGTLFTFPSLT	332	M	1	1.56518	1.67673	1.62095	0.0788809	57
1	QMPGTLFTFPSLT	333	M	1	0.669896	0.821703	0.7458	0.107343	165
1	QAMGTLFTFPSLT	334	M	1	1.74731	2.00604	1.87668	0.18295	49
1	QAPMTLFTFPSLT	335	M	1	1.14541	1.22085	1.18313	0.0533451	83
1	QAPGMLFTFPSLT	336	M	1	1.59626	1.02006	1.30816	0.407431	74
1	QAPGTMFTFPSLT	337	M	1	0.523089	0.562545	0.542817	0.0278999	236
1	QAPGTLMTFPSLT	338	M	1	0.778592	0.670331	0.724461	0.076552	171
1	QAPGTLFMFPSLT	339	M	1	1.04749	1.12	1.08374	0.0512741	94
1	QAPGTLFTMPSLT	340	M	1	0.790233	0.920851	0.855542	0.0923611	134
1	QAPGTLFTFMSLT	341	M	1	1.58452	1.65482	1.61967	0.0497127	58
1	QAPGTLFTFPMLT	342	M	1	1.23938	1.30019	1.26979	0.0429998	75
1	QAPGTLFTFPSMT	343	M	1	0.629801	0.630678	0.630239	0.000619869	206
1	QAPGTLFTFPSLM	344	M	1	0.970759	1.10773	1.03924	0.0968536	102
1	NAPGTLFTFPSLT	332	N	1	0.673495	0.742274	0.707884	0.0486347	178
1	QNPGTLFTFPSLT	333	N	1	0.648699	0.5616	0.605149	0.0615884	216
1	QANGTLFTFPSLT	334	N	1	0.515433	0.540269	0.527851	0.0175615	243
1	QAPNTLFTFPSLT	335	N	1	0.630027	0.481113	0.55557	0.105298	231
1	QAPGNLFTFPSLT	336	N	1	0.501948	0.57061	0.536279	0.0485518	239
1	QAPGTNFTFPSLT	337	N	1	0.405158	0.540269	0.472713	0.0955379	261
1	QAPGTLNTFPSLT	338	N	1	0.655339	0.4099	0.53262	0.173551	240
1	QAPGTLFNFPSLT	339	N	1	0.649749	0.671754	0.660752	0.0155599	190
1	QAPGTLFTNPSLT	340	N	1	0.536156	0.746666	0.641411	0.148853	203
1	QAPGTLFTFNSLT	341	N	1	0.557186	0.580895	0.569041	0.0167647	226
1	QAPGTLFTFPNLT	342	N	1	0.770968	0.744628	0.757798	0.018625	161
1	QAPGTLFTFPSNT	343	N	1	0.587068	0.520226	0.553647	0.0472642	232
1	QAPGTLFTFPSLN	344	N	1	0.466896	0.5824	0.524648	0.0816736	245
1	PAPGTLFTFPSLT	332	P	2	1.17018	0.990861	1.08052	0.177875	95
1	QPPGTLFTFPSLT	333	P	2	1.13554	1.16805	1.15179	0.0603878	85
1	QAPPTLFTFPSLT	335	P	2	0.917307	1.08062	0.998964	0.0980365	111
1	QAPGPLFTFPSLT	336	P	2	0.989891	1.0238	1.00685	0.359063	110
1	QAPGTPFTFPSLT	337	P	2	0.639311	0.613979	0.626645	0.0398913	208
1	QAPGTLPTFPSLT	338	P	2	0.651614	0.67923	0.665422	0.0684737	188
1	QAPGTLFPFPSLT	339	P	2	0.677673	0.622144	0.649908	0.0812304	196
1	QAPGTLFTPPSLT	340	P	2	0.876067	0.788194	0.83213	0.0632917	142
1	QAPGTLFTFPPLT	342	P	2	0.951486	0.983174	0.96733	0.0694483	117
1	QAPGTLFTFPSPT	343	P	2	0.874725	0.822707	0.848716	0.100651	137
1	QAPGTLFTFPSLP	344	P	2	0.911727	0.789154	0.850441	0.180259	136
1	QQPGTLFTFPSLT	333	Q	1	0.594529	0.52519	0.559859	0.0490303	229
1	QAQGTLFTFPSLT	334	Q	1	0.703417	0.643626	0.673522	0.0422779	184
1	QAPQTLFTFPSLT	335	Q	1	0.739278	0.740624	0.739951	0.000952023	167
1	QAPGQLFTFPSLT	336	Q	1	0.687943	0.728	0.707971	0.0283243	177
1	QAPGTQFTFPSLT	337	Q	1	0.36461	0.525042	0.444826	0.113443	265
1	QAPGTLQTFPSLT	338	Q	1	0.480445	0.551573	0.516009	0.0502953	247
1	QAPGTLFQFPSLT	339	Q	1	0.595704	0.642304	0.619004	0.0329508	213
1	QAPGTLFTQPSLT	340	Q	1	0.621467	0.954144	0.787806	0.235238	149
1	QAPGTLFTFQSLT	341	Q	1	0.841872	0.790929	0.8164	0.0360224	143
1	QAPGTLFTFPQLT	342	Q	1	0.690371	0.784314	0.737343	0.0664275	168
1	QAPGTLFTFPSQT	343	Q	1	0.888112	0.84557	0.866841	0.0300819	132
1	QAPGTLFTFPSLQ	344	Q	1	0.641243	0.548895	0.595069	0.0652999	217
1	RAPGTLFTFPSLT	332	R	3	1.10944	1.06812	1.08878	0.108741	92
1	QRPGTLFTFPSLT	333	R	3	0.649788	0.802193	0.725991	0.257357	170
1	QARGTLFTFPSLT	334	R	3	0.443272	0.388278	0.415775	0.0869533	268
1	QAPRTLFTFPSLT	335	R	3	0.511558	0.620706	0.566132	0.280371	227
1	QAPGRLFTFPSLT	336	R	3	0.472638	0.52326	0.497949	0.133556	255
1	QAPGTRFTFPSLT	337	R	3	0.331145	0.386894	0.35902	0.0799388	271
1	QAPGTLRTFPSLT	338	R	3	0.386232	0.437885	0.412058	0.0696245	269
1	QAPGTLFRFPSLT	339	R	3	0.719899	0.671978	0.695939	0.239458	181
1	QAPGTLFTRPSLT	340	R	3	0.444691	0.522292	0.483492	0.0435483	259
1	QAPGTLFTFRSLT	341	R	3	0.646259	0.673676	0.659967	0.0316666	192
1	QAPGTLFTFPRLT	342	R	3	0.730362	0.773832	0.752097	0.0693559	163
1	QAPGTLFTFPSRT	343	R	3	0.5704	0.574223	0.572311	0.0841193	224
1	QAPGTLFTFPSLR	344	R	3	0.754298	0.940007	0.847153	0.323266	138
1	SAPGTLFTFPSLT	332	S	3	0.764976	0.781742	0.773359	0.14066	154
1	QSPGTLFTFPSLT	333	S	3	1.03429	0.951796	0.993043	0.389411	113
1	QASGTLFTFPSLT	334	S	3	0.649542	0.602553	0.626048	0.184928	209
1	QAPSTLFTFPSLT	335	S	3	0.887561	0.936493	0.912027	0.265048	125
1	QAPGSLFTFPSLT	336	S	3	0.723819	0.646224	0.685022	0.152295	182
1	QAPGTSFTFPSLT	337	S	3	0.481375	0.506223	0.493799	0.0538301	257
1	QAPGTLSTFPSLT	338	S	3	0.493057	0.517925	0.505491	0.111562	252
1	QAPGTLFSFPSLT	339	S	3	0.451182	0.494637	0.47291	0.079994	260
1	QAPGTLFTSPSLT	340	S	3	0.714654	0.594476	0.654565	0.153648	193
1	QAPGTLFTFSSLT	341	S	3	0.601771	0.719847	0.660809	0.223813	189
1	QAPGTLFTFPSST	343	S	3	0.705427	0.723316	0.714372	0.178031	176
1	QAPGTLFTFPSLS	344	S	3	0.610933	0.558432	0.584682	0.0894723	220
1	TAPGTLFTFPSLT	332	T	2	0.788114	0.644009	0.716061	0.163754	175
1	QTPGTLFTFPSLT	333	T	2	0.614643	0.625417	0.62003	0.0392214	212
1	QATGTLFTFPSLT	334	T	2	0.594823	0.463861	0.529342	0.0968704	241
1	QAPTTLFTFPSLT	335	T	2	0.576493	0.593424	0.584959	0.0579868	219
1	QAPGTTFTFPSLT	337	T	2	0.517594	0.730786	0.62419	0.151248	210
1	QAPGTLTTFPSLT	338	T	2	0.602421	0.718756	0.660588	0.0686685	191
1	QAPGTLFTTPSLT	340	T	2	0.70587	0.568476	0.637173	0.0824179	204
1	QAPGTLFTFTSLT	341	T	2	0.932457	0.910792	0.921624	0.0543019	122
1	QAPGTLFTFPTLT	342	T	2	1.05664	1.10128	1.07896	0.431009	96
1	QAPGTLFTFPSTT	343	T	2	0.919734	1.0571	0.988416	0.392592	115
1	VAPGTLFTFPSLT	332	V	2	2.18217	2.04694	2.11455	0.334491	38
1	QVPGTLFTFPSLT	333	V	2	0.946922	1.09898	1.02295	0.100141	107
1	QAVGTLFTFPSLT	334	V	2	1.15076	1.0696	1.11018	0.145444	86
1	QAPVTLFTFPSLT	335	V	2	1.57455	1.57066	1.5726	0.0978195	60
1	QAPGVLFTFPSLT	336	V	2	1.64486	1.68865	1.66676	0.439719	56
1	QAPGTVFTFPSLT	337	V	2	0.654893	0.682435	0.668664	0.0586636	187
1	QAPGTLVTFPSLT	338	V	2	0.82399	0.842481	0.833235	0.240517	140
1	QAPGTLFVFPSLT	339	V	2	2.72147	2.28844	2.50496	0.580592	22
1	QAPGTLFTVPSLT	340	V	2	0.838311	0.776443	0.807377	0.0532201	145
1	QAPGTLFTFVSLT	341	V	2	1.79606	2.03128	1.91367	0.157343	47
1	QAPGTLFTFPVLT	342	V	2	2.24824	2.09561	2.17192	0.415777	34
1	QAPGTLFTFPSVT	343	V	2	0.555535	0.531065	0.5433	0.0164132	235
1	QAPGTLFTFPSLV	344	V	2	1.32467	1.11204	1.21835	0.220854	80
1	WAPGTLFTFPSLT	332	W	1	2.73319	2.65049	2.69184	0.0584788	13
1	QWPGTLFTFPSLT	333	W	1	3.56404	3.48147	3.52276	0.0583818	2
1	QAWGTLFTFPSLT	334	W	1	3.3517	3.12018	3.23594	0.163713	3
1	QAPWTLFTFPSLT	335	W	1	2.9415	2.02641	2.48395	0.647061	23
1	QAPGWLFTFPSLT	336	W	1	2.68018	2.90221	2.7912	0.157	11
1	QAPGTWFTFPSLT	337	W	1	1.41646	1.43671	1.42659	0.0143208	67
1	QAPGTLWTFPSLT	338	W	1	1.05416	0.922477	0.988318	0.093113	116
1	QAPGTLFWFPSLT	339	W	1	2.46835	2.56256	2.51545	0.0666192	21
1	QAPGTLFTWPSLT	340	W	1	1.49546	1.19132	1.34339	0.21506	72
1	QAPGTLFTFWSLT	341	W	1	2.74835	2.93642	2.84238	0.13299	10
1	QAPGTLFTFPWLT	342	W	1	2.71634	2.18609	2.45122	0.374943	25
1	QAPGTLFTFPSWT	343	W	1	2.70943	2.35387	2.53165	0.251423	19
1	QAPGTLFTFPSLW	344	W	1	2.52276	2.55763	2.54019	0.0246625	18
1	YAPGTLFTFPSLT	332	Y	1	1.83173	2.10746	1.9696	0.194972	42
1	QYPGTLFTFPSLT	333	Y	1	2.05694	1.89639	1.97667	0.113523	40
1	QAYGTLFTFPSLT	334	Y	1	2.764	2.43904	2.60152	0.229779	15
1	QAPYTLFTFPSLT	335	Y	1	1.81343	2.1389	1.97617	0.230144	41
1	QAPGYLFTFPSLT	336	Y	1	2.05121	1.8368	1.94401	0.151613	43
1	QAPGTYFTFPSLT	337	Y	1	0.746346	0.804915	0.775631	0.0414144	152
1	QAPGTLYTFPSLT	338	Y	1	1.32819	1.46576	1.39698	0.0972743	69
1	QAPGTLFYFPSLT	339	Y	1	1.8472	2.44168	2.14444	0.420361	36
1	QAPGTLFTYPSLT	340	Y	1	1.01208	1.02502	1.01855	0.00914944	108
1	QAPGTLFTFYSLT	341	Y	1	1.91758	1.96892	1.94325	0.0363013	44
1	QAPGTLFTFPYLT	342	Y	1	1.97961	1.771	1.87531	0.14751	50
1	QAPGTLFTFPSYT	343	Y	1	0.73853	0.796192	0.767361	0.040773	158
1	QAPGTLFTFPSLY	344	Y	1	1.17677	1.52794	1.35235	0.24832	71
1	QAPGTLFTFPSLT	333	syn	2	0.705398	0.74005	0.722724	0.103792	172	0.737472	0.113976
1	QAPGTLFTFPSLT	334	syn	2	0.625088	0.537667	0.581377	0.106004	221
1	QAPGTLFTFPSLT	335	syn	1	0.648467	0.792632	0.720549	0.10194	174
1	QAPGTLFTFPSLT	336	syn	2	0.86335	0.888283	0.875816	0.223791	131
1	QAPGTLFTFPSLT	337	syn	3	0.638131	0.755218	0.696674	0.21751	180
1	QAPGTLFTFPSLT	338	syn	1	0.686737	0.822956	0.754846	0.0963219	162
1	QAPGTLFTFPSLT	339	syn	1	0.712791	0.73245	0.722621	0.0139013	173
1	QAPGTLFTFPSLT	340	syn	1	0.668456	0.504026	0.586241	0.11627	218
1	QAPGTLFTFPSLT	341	syn	1	0.876518	1.01453	0.945524	0.0975893	119
1	QAPGTLFTFPSLT	342	syn	3	0.902197	0.762422	0.83231	0.167483	141
1	QAPGTLFTFPSLT	343	syn	2	0.644791	0.590584	0.617687	0.0969476	215
1	QAPGTLFTFPSLT	344	syn	1	0.611791	0.725935	0.668863	0.0807117	186
0	QAPGTLFTFPSLT	NA	syn	1	0.892615	0.831195	0.861905	0.0434302	133

## Sheet: RhT5-NMLV-LOF_Matrix_Fig6S1A
Position	G	P	A	I	L	V	F	W	Y	M	C	S	T	N	Q	H	K	R	D	E	stop
Q332	1.21842	1.08052	1.08769	2.23298	2.45966	2.11455	2.75321	2.69184	1.9696	1.62095	1.57327	0.773359	0.716061	0.707884	0.861905	1.04288	0.701496	1.08878	0.551978	0.743133	2.01556
A333	0.762779	1.15179	0.722724	1.55862	1.05513	1.02295	2.52884	3.52276	1.97667	0.7458	0.790347	0.993043	0.62003	0.605149	0.559859	0.880483	0.350098	0.725991	0.8838	0.43813	2.5559
P334	0.512918	0.581377	0.799808	1.24871	1.51159	1.11018	2.63337	3.23594	2.60152	1.87668	1.03499	0.626048	0.529342	0.527851	0.673522	0.879856	0.366273	0.415775	0.992684	0.896575	2.96845
G335	0.720549	0.998964	0.645312	1.39441	1.50188	1.5726	1.80831	2.48395	1.97617	1.18313	0.770919	0.912027	0.584959	0.55557	0.739951	0.644317	0.416499	0.566132	0.854207	0.963585	3.09122
T336	0.562036	1.00685	1.03687	2.17106	0.846611	1.66676	2.17437	2.7912	1.94401	1.30816	0.994683	0.685022	0.875816	0.536279	0.707971	0.79858	0.467045	0.497949	1.10455	1.02527	2.92219
L337	0.484494	0.626645	0.749744	0.627531	0.696674	0.668664	1.34279	1.42659	0.775631	0.542817	1.04449	0.493799	0.62419	0.472713	0.444826	0.509732	0.294653	0.35902	0.618894	1.09627	1.42144
F338	0.538974	0.665422	0.577434	1.77456	0.778173	0.833235	0.754846	0.988318	1.39698	0.724461	0.635982	0.505491	0.660588	0.53262	0.516009	0.761202	0.622693	0.412058	1.26373	1.5184	1.89168
T339	0.524875	0.649908	0.644279	2.28083	1.74838	2.50496	1.92101	2.51545	2.14444	1.08374	1.92906	0.47291	0.722621	0.660752	0.619004	1.17374	0.451043	0.695939	0.641909	0.915128	2.98387
F340	0.76929	0.83213	0.652425	0.465993	0.654059	0.807377	0.586241	1.34339	1.01855	0.855542	1.10335	0.654565	0.637173	0.641411	0.787806	0.5566	0.500942	0.483492	1.05432	1.71075	2.55049
P341	0.886363	0.945524	0.916659	2.24498	2.23039	1.91367	2.31466	2.84238	1.94325	1.61967	1.24237	0.660809	0.921624	0.569041	0.8164	0.931531	1.09547	0.659967	0.500232	0.571485	3.5335
S342	0.528392	0.96733	0.772799	2.19376	1.47329	2.17192	2.22353	2.45122	1.87531	1.26979	1.20497	0.83231	1.07896	0.757798	0.737343	1.03103	0.78693	0.752097	0.547579	1.00768	2.11777
L342	0.816249	0.848716	0.676189	0.671654	0.617687	0.5433	1.10542	2.53165	0.767361	0.630239	0.774508	0.714372	0.988416	0.553647	0.866841	0.643524	0.496053	0.572311	0.575019	0.538392	3.00757
T343	0.516359	0.850441	0.645758	1.68106	1.20418	1.21835	1.53576	2.54019	1.35235	1.03924	0.728392	0.584682	0.668863	0.524648	0.595069	1.07824	0.509816	0.847153	0.51377	0.927487	3.07808
	NB: WT (synonymous) are in bold

## Sheet: RhT5-NMLV-LOF_position_Fig6S1B
WT	Q332	A333	P334	G335	T336	L337	F338	T339	F340	P341	S342	L342	T343
0.861905	1.21842	0.762779	0.512918		0.562036	0.484494	0.538974	0.524875	0.76929	0.886363	0.528392	0.816249	0.516359
0.722724	1.08052	1.15179		0.998964	1.00685	0.626645	0.665422	0.649908	0.83213		0.96733	0.848716	0.850441
0.581377	1.08769		0.799808	0.645312	1.03687	0.749744	0.577434	0.644279	0.652425	0.916659	0.772799	0.676189	0.645758
0.720549	2.23298	1.55862	1.24871	1.39441	2.17106	0.627531	1.77456	2.28083	0.465993	2.24498	2.19376	0.671654	1.68106
0.875816	2.45966	1.05513	1.51159	1.50188	0.846611		0.778173	1.74838	0.654059	2.23039	1.47329		1.20418
0.696674	2.11455	1.02295	1.11018	1.5726	1.66676	0.668664	0.833235	2.50496	0.807377	1.91367	2.17192	0.5433	1.21835
0.754846	2.75321	2.52884	2.63337	1.80831	2.17437	1.34279		1.92101		2.31466	2.22353	1.10542	1.53576
0.722621	2.69184	3.52276	3.23594	2.48395	2.7912	1.42659	0.988318	2.51545	1.34339	2.84238	2.45122	2.53165	2.54019
0.586241	1.9696	1.97667	2.60152	1.97617	1.94401	0.775631	1.39698	2.14444	1.01855	1.94325	1.87531	0.767361	1.35235
0.945524	1.62095	0.7458	1.87668	1.18313	1.30816	0.542817	0.724461	1.08374	0.855542	1.61967	1.26979	0.630239	1.03924
0.83231	1.57327	0.790347	1.03499	0.770919	0.994683	1.04449	0.635982	1.92906	1.10335	1.24237	1.20497	0.774508	0.728392
0.617687	0.773359	0.993043	0.626048	0.912027	0.685022	0.493799	0.505491	0.47291	0.654565	0.660809		0.714372	0.584682
0.668863	0.716061	0.62003	0.529342	0.584959		0.62419	0.660588		0.637173	0.921624	1.07896	0.988416
	0.707884	0.605149	0.527851	0.55557	0.536279	0.472713	0.53262	0.660752	0.641411	0.569041	0.757798	0.553647	0.524648
		0.559859	0.673522	0.739951	0.707971	0.444826	0.516009	0.619004	0.787806	0.8164	0.737343	0.866841	0.595069
	1.04288	0.880483	0.879856	0.644317	0.79858	0.509732	0.761202	1.17374	0.5566	0.931531	1.03103	0.643524	1.07824
	0.701496	0.350098	0.366273	0.416499	0.467045	0.294653	0.622693	0.451043	0.500942	1.09547	0.78693	0.496053	0.509816
	1.08878	0.725991	0.415775	0.566132	0.497949	0.35902	0.412058	0.695939	0.483492	0.659967	0.752097	0.572311	0.847153
	0.551978	0.8838	0.992684	0.854207	1.10455	0.618894	1.26373	0.641909	1.05432	0.500232	0.547579	0.575019	0.51377
	0.743133	0.43813	0.896575	0.963585	1.02527	1.09627	1.5184	0.915128	1.71075	0.571485	1.00768	0.538392	0.927487
Holm-Sidak's multiple comparisons test	Mean Diff.	Significant?	Summary	Adjusted P Value
WT vs. Q332	-0.6903	Yes	*	0.0459
WT vs. A333	-0.3769	No	ns	0.568
WT vs. P334	-0.4454	No	ns	0.5167
WT vs. G335	-0.3453	No	ns	0.3788
WT vs. T336	-0.4375	No	ns	0.3761
WT vs. L337	0.04255	No	ns	0.8698
WT vs. F338	-0.08918	No	ns	0.8076
WT vs. T339	-0.5034	No	ns	0.3613
WT vs. F340	-0.07985	No	ns	0.682
WT vs. P341	-0.5721	No	ns	0.1654
WT vs. S342	-0.5168	No	ns	0.1742
WT vs. L342	-0.06852	No	ns	0.8698
WT vs. T343	-0.2569	No	ns	0.568

## Sheet: RhT5-NMLV-LOF_aminoacid_Fig6S1B
WT	G	P	A	I	L	V	F	W	Y	M	C	S	T	N	Q	H	K	R	D	E	stop	WT
0.861905	1.21842	1.08052	1.08769	2.23298	2.45966	2.11455	2.75321	2.69184	1.9696	1.62095	1.57327	0.773359	0.716061	0.707884		1.04288	0.701496	1.08878	0.551978	0.743133	2.01556	0.861905
0.722724	0.762779	1.15179		1.55862	1.05513	1.02295	2.52884	3.52276	1.97667	0.7458	0.790347	0.993043	0.62003	0.605149	0.559859	0.880483	0.350098	0.725991	0.8838	0.43813	2.5559	0.722724
0.581377	0.512918		0.799808	1.24871	1.51159	1.11018	2.63337	3.23594	2.60152	1.87668	1.03499	0.626048	0.529342	0.527851	0.673522	0.879856	0.366273	0.415775	0.992684	0.896575	2.96845	0.581377
0.720549		0.998964	0.645312	1.39441	1.50188	1.5726	1.80831	2.48395	1.97617	1.18313	0.770919	0.912027	0.584959	0.55557	0.739951	0.644317	0.416499	0.566132	0.854207	0.963585	3.09122	0.720549
0.875816	0.562036	1.00685	1.03687	2.17106	0.846611	1.66676	2.17437	2.7912	1.94401	1.30816	0.994683	0.685022		0.536279	0.707971	0.79858	0.467045	0.497949	1.10455	1.02527	2.92219	0.875816
0.696674	0.484494	0.626645	0.749744	0.627531		0.668664	1.34279	1.42659	0.775631	0.542817	1.04449	0.493799	0.62419	0.472713	0.444826	0.509732	0.294653	0.35902	0.618894	1.09627	1.42144	0.696674
0.754846	0.538974	0.665422	0.577434	1.77456	0.778173	0.833235		0.988318	1.39698	0.724461	0.635982	0.505491	0.660588	0.53262	0.516009	0.761202	0.622693	0.412058	1.26373	1.5184	1.89168	0.754846
0.722621	0.524875	0.649908	0.644279	2.28083	1.74838	2.50496	1.92101	2.51545	2.14444	1.08374	1.92906	0.47291		0.660752	0.619004	1.17374	0.451043	0.695939	0.641909	0.915128	2.98387	0.722621
0.586241	0.76929	0.83213	0.652425	0.465993	0.654059	0.807377		1.34339	1.01855	0.855542	1.10335	0.654565	0.637173	0.641411	0.787806	0.5566	0.500942	0.483492	1.05432	1.71075	2.55049	0.586241
0.945524	0.886363		0.916659	2.24498	2.23039	1.91367	2.31466	2.84238	1.94325	1.61967	1.24237	0.660809	0.921624	0.569041	0.8164	0.931531	1.09547	0.659967	0.500232	0.571485	3.5335	0.945524
0.83231	0.528392	0.96733	0.772799	2.19376	1.47329	2.17192	2.22353	2.45122	1.87531	1.26979	1.20497		1.07896	0.757798	0.737343	1.03103	0.78693	0.752097	0.547579	1.00768	2.11777	0.83231
0.617687	0.816249	0.848716	0.676189	0.671654		0.5433	1.10542	2.53165	0.767361	0.630239	0.774508	0.714372	0.988416	0.553647	0.866841	0.643524	0.496053	0.572311	0.575019	0.538392	3.00757	0.617687
0.668863	0.516359	0.850441	0.645758	1.68106	1.20418	1.21835	1.53576	2.54019	1.35235	1.03924	0.728392	0.584682		0.524648	0.595069	1.07824	0.509816	0.847153	0.51377	0.927487	3.07808	0.668863
Holm-Sidak's multiple comparisons test	Mean Diff.	Significant?	Summary	Adjusted P Value
WT vs. G	0.06071	No	ns	0.8101
WT vs. P	-0.1424	No	ns	0.1295
WT vs. A	-0.02961	No	ns	0.8101
WT vs. I	-0.843	Yes	**	0.0033
WT vs. L	-0.6683	Yes	*	0.0194
WT vs. V	-0.6586	Yes	*	0.0186
WT vs. F	-1.294	Yes	****	<0.0001
WT vs. W	-1.675	Yes	****	<0.0001
WT vs. Y	-0.935	Yes	***	0.0007
WT vs. M	-0.3779	No	ns	0.0505
WT vs. C	-0.3262	No	ns	0.0598
WT vs. S	0.06446	No	ns	0.7622
WT vs. T	0.001338	No	ns	0.9798
WT vs. N	0.1494	Yes	*	0.0115
WT vs. Q	0.06542	No	ns	0.7065
WT vs. H	-0.1034	No	ns	0.5001
WT vs. K	0.1945	Yes	*	0.0127
WT vs. R	0.1162	No	ns	0.3579
WT vs. D	-0.03966	No	ns	0.8779
WT vs. E	-0.2127	No	ns	0.5001
WT vs. stop	-1.889	Yes	****	<0.0001

## Sheet: HsT5-NMLV-LOF_Replicates_Fig6B
dist_codon	seq_aa	mutcod_index	mut_aa	num_nt_seqs	enrichA_avg	enrichB_avg	enrich_Avg_RepAndAA	enrich_SD_RepAndAA	Rank	WT avg	WT SD
1	GARGTRYQ*FVNF	338	STOP	1	7.57824	6.08247	6.83035	1.05766	1
1	GARGTRY*TFVNF	337	STOP	1	7.33767	6.07937	6.70852	0.889753	2
1	GA*GTRYQTFVNF	332	STOP	1	6.13402	5.01546	5.57474	0.790937	3
1	*ARGTRYQTFVNF	330	STOP	1	6.39341	4.60163	5.49752	1.26698	4
1	G*RGTRYQTFVNF	331	STOP	1	5.72238	4.80783	5.26511	0.64669	5
1	GARGTR*QTFVNF	336	STOP	1	6.52385	3.92969	5.22677	1.83435	6
1	GARGTRYQTF*NF	340	STOP	1	5.41985	4.86867	5.14426	0.389744	7
1	GAR*TRYQTFVNF	333	STOP	1	4.36059	5.1834	4.77199	0.58182	8
1	GARGTRYQT*VNF	339	STOP	1	4.73284	4.5388	4.63582	0.137206	9
1	GARG*RYQTFVNF	334	STOP	1	4.39624	4.65799	4.52711	0.185085	10
1	GARGT*YQTFVNF	335	STOP	1	5.358	3.4991	4.42855	1.31444	11
1	GARATRYQTFVNF	333	A	2	1.73564	0.981574	1.35861	0.875284	27
1	GARGTRYQTFANF	340	A	2	1.05194	1.2574	1.15467	0.126043	43
1	GARGTRAQTFVNF	336	A	2	1.05108	1.20347	1.12727	0.576824	46
1	GARGTRYQAFVNF	338	A	2	1.07658	1.12434	1.10046	0.114569	52
1	GARGTAYQTFVNF	335	A	2	0.823457	0.933818	0.878638	0.176389	102
1	GARGARYQTFVNF	334	A	2	0.803491	0.910359	0.856925	0.138265	110
1	AARGTRYQTFVNF	330	A	2	0.925781	0.762055	0.843918	0.133701	117
1	GAAGTRYQTFVNF	332	A	2	0.771471	0.782208	0.776839	0.150003	146
1	GARGTRYATFVNF	337	A	2	0.736172	0.794063	0.765117	0.121344	150
1	GARGTRYQTAVNF	339	A	2	0.659123	0.783146	0.721134	0.100569	170
1	GARGTRYQTFCNF	340	C	1	1.65575	1.57884	1.61729	0.05438	15
1	GARGTRYQCFVNF	338	C	1	1.15558	1.07505	1.11532	0.056942	47
1	GARGCRYQTFVNF	334	C	1	0.865063	1.23954	1.0523	0.264797	63
1	GARGTRCQTFVNF	336	C	1	0.975728	1.01096	0.993342	0.0249107	72
1	GACGTRYQTFVNF	332	C	1	0.915913	0.98508	0.950496	0.0489085	81
1	GARGTCYQTFVNF	335	C	1	0.869257	1.00468	0.936968	0.0957571	83
1	GARGTRYCTFVNF	337	C	1	0.948741	0.714242	0.831492	0.165815	120
1	GCRGTRYQTFVNF	331	C	1	0.700297	0.847156	0.773727	0.103845	148
1	CARGTRYQTFVNF	330	C	1	0.555861	0.829582	0.692722	0.19355	185
1	GARCTRYQTFVNF	333	C	1	0.430131	0.70464	0.567385	0.194107	219
1	GARGTRYQTFDNF	340	D	1	1.5349	1.32103	1.42797	0.151232	23
1	DARGTRYQTFVNF	330	D	1	1.18449	0.921676	1.05308	0.185836	62
1	GARGTRYQDFVNF	338	D	1	1.06088	0.994788	1.02783	0.0467335	64
1	GARGDRYQTFVNF	334	D	1	1.05851	0.85614	0.957324	0.143096	78
1	GARGTDYQTFVNF	335	D	1	0.765858	1.03913	0.902493	0.193231	92
1	GARGTRDQTFVNF	336	D	1	0.639455	0.83986	0.739658	0.141708	158
1	GARGTRYDTFVNF	337	D	1	0.732305	0.681295	0.7068	0.0360699	178
1	GADGTRYQTFVNF	332	D	1	0.674263	0.738989	0.706626	0.0457682	179
1	GARGTRYQTDVNF	339	D	1	0.668232	0.7406	0.704416	0.0511723	180
1	GARDTRYQTFVNF	333	D	1	0.402128	0.996591	0.69936	0.420349	182
1	GDRGTRYQTFVNF	331	D	1	0.606034	0.654177	0.630106	0.0340421	206
1	GARGERYQTFVNF	334	E	1	1.62017	1.5924	1.60629	0.0196381	16
1	GARGTRYQTFENF	340	E	1	1.68854	1.51839	1.60346	0.120314	17
1	GARGTRYQEFVNF	338	E	1	1.30433	1.25523	1.27978	0.034716	30
1	GERGTRYQTFVNF	331	E	1	0.964202	0.804534	0.884368	0.112902	98
1	GARGTRYQTEVNF	339	E	1	0.852423	0.805665	0.829044	0.0330634	123
1	GARGTEYQTFVNF	335	E	1	0.880456	0.771254	0.825855	0.0772177	125
1	EARGTRYQTFVNF	330	E	1	0.766681	0.791452	0.779067	0.0175158	145
1	GAEGTRYQTFVNF	332	E	1	0.727931	0.762955	0.745443	0.0247658	156
1	GARETRYQTFVNF	333	E	1	0.654688	0.774701	0.714694	0.0848617	172
1	GARGTRYETFVNF	337	E	1	0.703832	0.690616	0.697224	0.00934543	183
1	GARGTREQTFVNF	336	E	1	0.628891	0.751844	0.690368	0.0869404	188
1	GARGTRYFTFVNF	337	F	1	1.79751	1.20513	1.50132	0.418876	18
1	GARGTRYQTFFNF	340	F	1	1.26759	1.12348	1.19554	0.101904	36
1	GARGTRYQFFVNF	338	F	1	0.793482	1.05944	0.926461	0.188061	86
1	GARGFRYQTFVNF	334	F	1	0.992139	0.818023	0.905081	0.123118	91
1	GAFGTRYQTFVNF	332	F	1	1.06471	0.626473	0.845592	0.309881	115
1	FARGTRYQTFVNF	330	F	1	0.553036	0.813805	0.683421	0.184392	190
1	GARGTRFQTFVNF	336	F	1	0.411011	0.791678	0.601345	0.269172	214
1	GARGTFYQTFVNF	335	F	1	0.57079	0.595169	0.58298	0.0172387	215
1	GFRGTRYQTFVNF	331	F	1	0.480266	0.656397	0.568331	0.124543	218
1	GARGTRYQGFVNF	338	G	2	1.15164	1.05943	1.10553	0.191491	49
1	GAGGTRYQTFVNF	332	G	2	1.05981	0.964752	1.01228	0.152913	69
1	GARGTRYGTFVNF	337	G	2	1.00847	0.984456	0.996464	0.127949	71
1	GARGTRYQTFGNF	340	G	2	0.732696	0.952811	0.842753	0.178872	118
1	GARGTGYQTFVNF	335	G	2	0.767656	0.842552	0.805104	0.0698009	139
1	GARGGRYQTFVNF	334	G	2	0.739236	0.714941	0.727088	0.0234613	166
1	GGRGTRYQTFVNF	331	G	2	0.621341	0.679819	0.65058	0.0652555	201
1	GARGTRGQTFVNF	336	G	2	0.70769	0.57922	0.643455	0.0929028	202
1	GHRGTRYQTFVNF	331	H	1	1.48531	0.902135	1.19372	0.412364	38
1	GARGHRYQTFVNF	334	H	1	0.983453	1.27128	1.12737	0.203523	45
1	HARGTRYQTFVNF	330	H	1	0.732271	1.02571	0.878989	0.207491	101
1	GARGTHYQTFVNF	335	H	1	0.616628	1.00956	0.813094	0.277845	134
1	GARGTRYQTHVNF	339	H	1	0.569626	0.878635	0.724131	0.218502	167
1	GARGTRHQTFVNF	336	H	1	0.855221	0.590003	0.722612	0.187538	169
1	GAHGTRYQTFVNF	332	H	1	0.592685	0.771712	0.682199	0.126591	192
1	GARGTRYHTFVNF	337	H	1	0.431249	0.880751	0.656	0.317846	200
1	GARGTRYQHFVNF	338	H	1	0.547812	0.702746	0.625279	0.109555	207
1	GARGTRYQTFHNF	340	H	1	0.50081	0.605439	0.553124	0.0739844	220
1	GARHTRYQTFVNF	333	H	1	0.25532	0.45364	0.35448	0.140234	224
1	GIRGTRYQTFVNF	331	I	1	1.25591	1.22475	1.24033	0.0220329	31
1	GARGTRYITFVNF	337	I	1	0.934704	1.23468	1.08469	0.212115	59
1	GARGTRYQIFVNF	338	I	1	0.904908	0.857753	0.881331	0.0333439	100
1	GARGIRYQTFVNF	334	I	1	0.872134	0.832533	0.852334	0.0280017	113
1	GARGTRIQTFVNF	336	I	1	0.973164	0.663614	0.818389	0.218885	132
1	IARGTRYQTFVNF	330	I	1	0.547415	1.0171	0.78226	0.33212	144
1	GARITRYQTFVNF	333	I	1	0.646698	0.867902	0.7573	0.156415	152
1	GARGTRYQTFINF	340	I	1	0.616477	0.620999	0.618738	0.00319782	209
1	GAIGTRYQTFVNF	332	I	1	0.499721	0.645583	0.572652	0.10314	217
1	GARGTRYQTIVNF	339	I	1	0.531491	0.573807	0.552649	0.0299218	221
1	GARGTIYQTFVNF	335	I	1	0.425533	0.533952	0.479742	0.0766639	222
1	GKRGTRYQTFVNF	331	K	1	2.08163	1.46401	1.77282	0.436724	13
1	GARGKRYQTFVNF	334	K	1	1.35908	1.05462	1.20685	0.215284	35
1	GARGTRYKTFVNF	337	K	1	1.20959	0.996444	1.10302	0.15072	50
1	GARGTRYQKFVNF	338	K	1	0.881612	0.948481	0.915047	0.0472832	87
1	GAKGTRYQTFVNF	332	K	1	0.761109	0.68664	0.723875	0.0526572	168
1	GARGTRYQTFKNF	340	K	1	0.750128	0.674005	0.712066	0.053827	173
1	GARGTRYQTKVNF	339	K	1	0.679875	0.686875	0.683375	0.00494953	191
1	GARGTKYQTFVNF	335	K	1	0.694969	0.652507	0.673738	0.0300248	195
1	GARGTRKQTFVNF	336	K	1	0.63924	0.679509	0.659375	0.0284741	199
1	KARGTRYQTFVNF	330	K	1	0.501219	0.762334	0.631776	0.184636	204
1	GARKTRYQTFVNF	333	K	1	0.5402	0.674827	0.607513	0.0951958	212
1	GARLTRYQTFVNF	333	L	2	1.19349	1.13256	1.16303	0.539122	42
1	GARGTRYQLFVNF	338	L	3	1.0951	1.09759	1.09635	0.19686	54
1	GLRGTRYQTFVNF	331	L	3	1.01437	1.13505	1.07471	0.680265	60
1	GALGTRYQTFVNF	332	L	3	1.05704	0.96772	1.01238	0.154084	68
1	GARGTRYQTLVNF	339	L	3	0.83448	0.934432	0.884456	0.340837	97
1	GARGLRYQTFVNF	334	L	3	0.810763	0.878222	0.844492	0.240499	116
1	GARGTLYQTFVNF	335	L	3	0.808991	0.808673	0.808832	0.0970979	135
1	LARGTRYQTFVNF	330	L	3	0.701502	0.838926	0.770214	0.212284	149
1	GARGTRYLTFVNF	337	L	3	0.687846	0.780712	0.734279	0.104636	161
1	GARGTRYQTFLNF	340	L	3	0.697254	0.724035	0.710644	0.11091	175
1	GARGTRLQTFVNF	336	L	3	0.975998	0.375756	0.675877	0.417569	193
1	GARGTRYQTFMNF	340	M	1	1.2838	1.44345	1.36362	0.112895	26
1	GARGTRYQMFVNF	338	M	1	1.14109	1.05791	1.0995	0.0588179	53
1	GARGTMYQTFVNF	335	M	1	0.966648	0.754898	0.860773	0.14973	106
1	GARGTRYMTFVNF	337	M	1	0.796396	0.915595	0.855996	0.0842863	111
1	GARGMRYQTFVNF	334	M	1	0.794137	0.867514	0.830826	0.0518849	121
1	GARGTRMQTFVNF	336	M	1	0.731142	0.87523	0.803186	0.101885	140
1	MARGTRYQTFVNF	330	M	1	0.7492	0.753837	0.751519	0.00327923	155
1	GARGTRYQTMVNF	339	M	1	0.729288	0.739786	0.734537	0.00742343	160
1	GAMGTRYQTFVNF	332	M	1	0.676984	0.761967	0.719475	0.060092	171
1	GMRGTRYQTFVNF	331	M	1	0.656285	0.690245	0.673265	0.024014	196
1	GARMTRYQTFVNF	333	M	1	0.663495	0.659905	0.6617	0.00253839	198
1	GARGTRYQTFNNF	340	N	1	1.10306	2.2558	1.67943	0.815109	14
1	GARGTRNQTFVNF	336	N	1	1.27791	0.909732	1.09382	0.260342	55
1	GARGTRYQNFVNF	338	N	1	1.08195	1.09737	1.08966	0.0109046	57
1	GANGTRYQTFVNF	332	N	1	0.974398	0.929357	0.951877	0.0318485	79
1	NARGTRYQTFVNF	330	N	1	1.07616	0.826931	0.951544	0.176229	80
1	GARGTRYNTFVNF	337	N	1	0.68893	0.943913	0.816422	0.1803	133
1	GARGTNYQTFVNF	335	N	1	0.798686	0.685175	0.741931	0.0802639	157
1	GNRGTRYQTFVNF	331	N	1	0.741964	0.723021	0.732492	0.0133951	162
1	GARGTRYQTNVNF	339	N	1	0.680666	0.736749	0.708707	0.0396568	176
1	GARGNRYQTFVNF	334	N	1	0.633048	0.58756	0.610304	0.0321651	211
1	GARGTPYQTFVNF	335	P	2	1.40287	1.46278	1.43283	0.903549	22
1	GARPTRYQTFVNF	333	P	1	0.842784	1.83523	1.339	0.701762	28
1	GARGTRYQPFVNF	338	P	2	1.38263	1.06693	1.22478	0.227879	33
1	GARGTRYQTFPNF	340	P	2	1.22703	1.12575	1.17639	0.553968	41
1	GARGTRYQTPVNF	339	P	2	0.791977	0.972096	0.882036	0.170092	99
1	GARGTRPQTFVNF	336	P	1	0.580715	1.0774	0.829056	0.351206	122
1	GARGPRYQTFVNF	334	P	2	0.921256	0.722758	0.822007	0.308081	127
1	GPRGTRYQTFVNF	331	P	2	0.819378	0.772524	0.795951	0.272375	142
1	GAPGTRYQTFVNF	332	P	2	0.631498	0.75082	0.691159	0.0695243	187
1	GARGTRYPTFVNF	337	P	2	0.753641	0.594294	0.673967	0.172317	194
1	PARGTRYQTFVNF	330	P	2	0.601104	0.648742	0.624923	0.0706859	208
1	GARGTRYQTFQNF	340	Q	1	1.43499	1.51647	1.47573	0.0576194	19
1	GARGQRYQTFVNF	334	Q	1	1.16497	1.03742	1.1012	0.0901889	51
1	GARGTQYQTFVNF	335	Q	1	0.96127	0.992665	0.976967	0.0221996	75
1	GAQGTRYQTFVNF	332	Q	1	0.874192	0.989941	0.932067	0.081847	84
1	QARGTRYQTFVNF	330	Q	1	0.793775	1.02792	0.910849	0.165568	89
1	GARQTRYQTFVNF	333	Q	1	1.01796	0.775725	0.896843	0.171286	94
1	GARGTRYQQFVNF	338	Q	1	0.753172	0.886959	0.820065	0.0946018	130
1	GQRGTRYQTFVNF	331	Q	1	0.758392	0.69904	0.728716	0.0419685	164
1	GARGTRYQTQVNF	339	Q	1	0.659786	0.796336	0.728061	0.0965558	165
1	GARGTRQQTFVNF	336	Q	1	0.723304	0.48838	0.605842	0.166116	213
1	GARGRRYQTFVNF	334	R	3	1.2093	1.22331	1.2163	0.159174	34
1	GARGTRYQTFRNF	340	R	3	0.854858	0.885515	0.870186	0.0724445	104
1	GARGTRYQRFVNF	338	R	3	0.846168	0.862454	0.854311	0.102401	112
1	GRRGTRYQTFVNF	331	R	3	0.822123	0.821663	0.821893	0.0829257	128
1	GARGTRYRTFVNF	337	R	3	0.701484	0.914426	0.807955	0.179514	136
1	GARGTRRQTFVNF	336	R	3	0.676449	0.737409	0.706929	0.0692984	177
1	RARGTRYQTFVNF	330	R	3	0.736929	0.631759	0.684344	0.117284	189
1	GARRTRYQTFVNF	333	R	3	0.650835	0.582581	0.616708	0.139656	210
1	GARGTRYSTFVNF	337	S	3	1.55531	1.19125	1.37328	0.606192	25
1	GARGTRYQSFVNF	338	S	3	1.2577	1.13158	1.19464	0.344635	37
1	GARGTRYQTSVNF	339	S	2	1.2415	1.14411	1.1928	0.530725	39
1	GARGTRYQTFSNF	340	S	3	1.10236	1.08154	1.09195	0.243236	56
1	GASGTRYQTFVNF	332	S	3	0.957573	0.973137	0.965355	0.248445	76
1	GARGTSYQTFVNF	335	S	3	0.812409	0.912484	0.862446	0.276646	105
1	SARGTRYQTFVNF	330	S	3	0.796831	0.857798	0.827315	0.217793	124
1	GSRGTRYQTFVNF	331	S	3	0.931384	0.680776	0.80608	0.265014	138
1	GARGSRYQTFVNF	334	S	3	0.740313	0.851339	0.795826	0.149991	143
1	GARGTRSQTFVNF	336	S	3	0.629547	0.636969	0.633258	0.23969	203
1	GARSTRYQTFVNF	333	S	2	0.321356	0.540141	0.430749	0.175934	223
1	GARGTRYQTTVNF	339	T	2	1.82152	1.0593	1.44041	0.930374	20
1	TARGTRYQTFVNF	330	T	2	1.04581	1.40829	1.22705	0.26058	32
1	GARGTRTQTFVNF	336	T	2	0.587752	1.53087	1.05931	1.09607	61
1	GTRGTRYQTFVNF	331	T	2	0.82088	0.973872	0.897376	0.113268	93
1	GARGTRYTTFVNF	337	T	2	0.57846	0.930825	0.754642	0.259915	153
1	GATGTRYQTFVNF	332	T	2	0.7536	0.723339	0.738469	0.0799154	159
1	GARTTRYQTFVNF	333	T	1	0.58475	0.837009	0.71088	0.178374	174
1	GARGTTYQTFVNF	335	T	2	0.604734	0.725382	0.665058	0.154989	197
1	GARGTRYQTFTNF	340	T	2	0.543825	0.718463	0.631144	0.107718	205
1	GARGVRYQTFVNF	334	V	2	1.44923	1.42914	1.43918	0.224106	21
1	GAVGTRYQTFVNF	332	V	2	1.07944	0.97354	1.02649	0.16872	66
1	GARGTRYVTFVNF	337	V	2	1.07281	0.927575	1.00019	0.265101	70
1	VARGTRYQTFVNF	330	V	2	0.870471	0.914075	0.892273	0.0569581	95
1	GARGTRYQTVVNF	339	V	2	0.865713	0.855277	0.860495	0.0677456	107
1	GARGTRYQVFVNF	338	V	2	0.779352	0.938314	0.858833	0.0923779	109
1	GARGTRVQTFVNF	336	V	2	0.840761	0.802993	0.821877	0.117023	129
1	GVRGTRYQTFVNF	331	V	2	0.727299	0.779112	0.753205	0.081212	154
1	GARGTVYQTFVNF	335	V	2	0.69016	0.768834	0.729497	0.134548	163
1	GARVTRYQTFVNF	333	V	2	0.558634	0.59794	0.578287	0.241046	216
1	GARGWRYQTFVNF	334	W	1	2.67221	2.29197	2.48209	0.268873	12
1	GARWTRYQTFVNF	333	W	1	1.06836	1.10847	1.08841	0.0283637	58
1	GARGTRYWTFVNF	337	W	1	1.07668	0.97202	1.02435	0.074009	67
1	GARGTRYQWFVNF	338	W	1	0.888854	1.0771	0.982976	0.133109	73
1	GAWGTRYQTFVNF	332	W	1	1.00091	0.86034	0.930624	0.0993964	85
1	GWRGTRYQTFVNF	331	W	1	0.95871	0.82509	0.8919	0.0944835	96
1	GARGTRYQTFWNF	340	W	1	0.828885	0.816391	0.822638	0.0088346	126
1	WARGTRYQTFVNF	330	W	1	0.938714	0.674754	0.806734	0.186648	137
1	GARGTRWQTFVNF	336	W	1	0.771171	0.826667	0.798919	0.0392417	141
1	GARGTWYQTFVNF	335	W	1	0.758866	0.768814	0.76384	0.00703366	151
1	GARGTYYQTFVNF	335	Y	1	1.17923	1.38844	1.28384	0.147927	29
1	GARGTRYQTFYNF	340	Y	1	1.12317	1.26069	1.19193	0.0972415	40
1	GARGTRYYTFVNF	337	Y	1	1.2015	1.06243	1.13197	0.0983385	44
1	GARGTRYQYFVNF	338	Y	1	1.05324	0.875474	0.964355	0.125696	77
1	YARGTRYQTFVNF	330	Y	1	0.819794	0.928739	0.874267	0.0770357	103
1	GYRGTRYQTFVNF	331	Y	1	0.778151	0.861262	0.819706	0.0587683	131
1	GARYTRYQTFVNF	333	Y	1	1.31751	0.231507	0.77451	0.767923	147
1	GARGYRYQTFVNF	334	Y	1	0.852465	0.548004	0.700234	0.215287	181
1	GAYGTRYQTFVNF	332	Y	1	0.606178	0.78473	0.695454	0.126255	184
1	GARGTRYQTYVNF	339	Y	1	0.563632	0.820132	0.691882	0.181373	186
1	GARGTRYQTFVNF	330	syn	1	1.32645	1.43199	1.37922	0.0746261	24	0.98021	0.163481
1	GARGTRYQTFVNF	335	syn	3	1.22964	0.987442	1.10854	0.26719	48
1	GARGTRYQTFVNF	340	syn	1	0.959251	1.09423	1.02674	0.0954445	65
1	GARGTRYQTFVNF	334	syn	2	0.866854	1.08873	0.97779	0.186306	74
0	GARGTRYQTFVNF	NA	syn	1	0.871051	1.00841	0.93973	0.0971263	82
1	GARGTRYQTFVNF	331	syn	2	0.910765	0.913927	0.912346	0.042136	88
1	GARGTRYQTFVNF	333	syn	1	0.901477	0.916088	0.908782	0.0103316	90
1	GARGTRYQTFVNF	338	syn	2	0.727733	0.99181	0.859771	0.203654	108
1	GARGTRYQTFVNF	332	syn	3	0.872806	0.825853	0.84933	0.129641	114
1	GARGTRYQTFVNF	339	syn	1	0.854934	0.824756	0.839845	0.0213388	119

## Sheet: HsT5-NMLV-LOF_Matrix_Fig6S2A
Position	G	P	A	I	L	V	F	W	Y	M	C	S	T	N	Q	H	K	R	D	E	stop
G330	1.37922	0.624923	0.843918	0.78226	0.770214	0.892273	0.683421	0.806734	0.874267	0.751519	0.692722	0.827315	1.22705	0.951544	0.910849	0.878989	0.631776	0.684344	1.05308	0.779067	5.49752
A331	0.65058	0.795951	0.912346	1.24033	1.07471	0.753205	0.568331	0.8919	0.819706	0.673265	0.773727	0.80608	0.897376	0.732492	0.728716	1.19372	1.77282	0.821893	0.630106	0.884368	5.26511
R332	1.01228	0.691159	0.776839	0.572652	1.01238	1.02649	0.845592	0.930624	0.695454	0.719475	0.950496	0.965355	0.738469	0.951877	0.932067	0.682199	0.723875	0.84933	0.706626	0.745443	5.57474
G333	0.908782	1.339	1.35861	0.7573	1.16303	0.578287	NA	1.08841	0.77451	0.6617	0.567385	0.430749	0.71088	NA	0.896843	0.35448	0.607513	0.616708	0.69936	0.714694	4.77199
T334	0.727088	0.822007	0.856925	0.852334	0.844492	1.43918	0.905081	2.48209	0.700234	0.830826	1.0523	0.795826	0.97779	0.610304	1.1012	1.12737	1.20685	1.2163	0.957324	1.60629	4.52711
R335	0.805104	1.43283	0.878638	0.479742	0.808832	0.729497	0.58298	0.76384	1.28384	0.860773	0.936968	0.862446	0.665058	0.741931	0.976967	0.813094	0.673738	1.10854	0.902493	0.825855	4.42855
Y336	0.643455	0.829056	1.12727	0.818389	0.675877	0.821877	0.601345	0.798919	0.93973	0.803186	0.993342	0.633258	1.05931	1.09382	0.605842	0.722612	0.659375	0.706929	0.739658	0.690368	5.22677
Q337	0.996464	0.673967	0.765117	1.08469	0.734279	1.00019	1.50132	1.02435	1.13197	0.855996	0.831492	1.37328	0.754642	0.816422	0.93973	0.656	1.10302	0.807955	0.7068	0.697224	6.70852
T338	1.10553	1.22478	1.10046	0.881331	1.09635	0.858833	0.926461	0.982976	0.964355	1.0995	1.11532	1.19464	0.859771	1.08966	0.820065	0.625279	0.915047	0.854311	1.02783	1.27978	6.83035
F339	NA	0.882036	0.721134	0.552649	0.884456	0.860495	0.839845	NA	0.691882	0.734537	NA	1.1928	1.44041	0.708707	0.728061	0.724131	0.683375	NA	0.704416	0.829044	4.63582
V340	0.842753	1.17639	1.15467	0.618738	0.710644	1.02674	1.19554	0.822638	1.19193	1.36362	1.61729	1.09195	0.631144	1.67943	1.47573	0.553124	0.712066	0.870186	1.42797	1.60346	5.14426
	NB: WT bolded; Y336Y & Q337Q values are identical as they have identical nucleotide sequences
	NA: excluded due to low read counts in input library

## Sheet: HsT5-NMLV-LOF_position_Fig6S1B
WT	G330	A331	R332	G333	T334	R335	Y336	Q337	T338	F339	V340
1.37922		0.65058	1.01228		0.727088	0.805104	0.643455	0.996464	1.10553		0.842753
0.912346	0.624923	0.795951	0.691159	1.339	0.822007	1.43283	0.829056	0.673967	1.22478	0.882036	1.17639
0.84933	0.843918		0.776839	1.35861	0.856925	0.878638	1.12727	0.765117	1.10046	0.721134	1.15467
0.908782	0.78226	1.24033	0.572652	0.7573	0.852334	0.479742	0.818389	1.08469	0.881331	0.552649	0.618738
0.97779	0.770214	1.07471	1.01238	1.16303	0.844492	0.808832	0.675877	0.734279	1.09635	0.884456	0.710644
1.10854	0.892273	0.753205	1.02649	0.578287	1.43918	0.729497	0.821877	1.00019	0.858833	0.860495
0.93973	0.683421	0.568331	0.845592		0.905081	0.58298	0.601345	1.50132	0.926461		1.19554
	0.806734	0.8919	0.930624	1.08841	2.48209	0.76384	0.798919	1.02435	0.982976		0.822638
0.859771	0.874267	0.819706	0.695454	0.77451	0.700234	1.28384		1.13197	0.964355	0.691882	1.19193
0.839845	0.751519	0.673265	0.719475	0.6617	0.830826	0.860773	0.803186	0.855996	1.0995	0.734537	1.36362
1.02674	0.692722	0.773727	0.950496	0.567385	1.0523	0.936968	0.993342	0.831492	1.11532		1.61729
	0.827315	0.80608	0.965355	0.430749	0.795826	0.862446	0.633258	1.37328	1.19464	1.1928	1.09195
	1.22705	0.897376	0.738469	0.71088		0.665058	1.05931	0.754642		1.44041	0.631144
	0.951544	0.732492	0.951877		0.610304	0.741931	1.09382	0.816422	1.08966	0.708707	1.67943
	0.910849	0.728716	0.932067	0.896843	1.1012	0.976967	0.605842		0.820065	0.728061	1.47573
	0.878989	1.19372	0.682199	0.35448	1.12737	0.813094	0.722612	0.656	0.625279	0.724131	0.553124
	0.631776	1.77282	0.723875	0.607513	1.20685	0.673738	0.659375	1.10302	0.915047	0.683375	0.712066
	0.684344	0.821893		0.616708	1.2163		0.706929	0.807955	0.854311		0.870186
	1.05308	0.630106	0.706626	0.69936	0.957324	0.902493	0.739658	0.7068	1.02783	0.704416	1.42797
	0.779067	0.884368	0.745443	0.714694	1.60629	0.825855	0.690368	0.697224	1.27978	0.829044	1.60346
Holm-Sidak's multiple comparisons test	Mean Diff.	Significant?	Summary	Adjusted P Value
WT vs. G330	0.1557	Yes	*	0.0185
WT vs. A331	0.1008	No	ns	0.8053
WT vs. R332	0.155	Yes	*	0.0168
WT vs. G333	0.1967	No	ns	0.6507
WT vs. T334	-0.07948	No	ns	0.8086
WT vs. R335	0.1368	No	ns	0.7487
WT vs. Y336	0.1895	No	ns	0.2804
WT vs. Q337	0.05836	No	ns	0.8086
WT vs. T338	-0.02834	No	ns	0.8086
WT vs. F339	0.1577	Yes	*	0.0219
WT vs. V340	-0.1113	No	ns	0.8086

## Sheet: HsT5-NMLV-LOF_aminoacid_Fig6S1B
WT	G	P	A	I	L	V	F	W	Y	M	C	S	T	N	Q	H	K	R	D	E	stop	WT
1.37922		0.624923	0.843918	0.78226	0.770214	0.892273	0.683421	0.806734	0.874267	0.751519	0.692722	0.827315	1.22705	0.951544	0.910849	0.878989	0.631776	0.684344	1.05308	0.779067	5.49752	1.37922
0.912346	0.65058	0.795951		1.24033	1.07471	0.753205	0.568331	0.8919	0.819706	0.673265	0.773727	0.80608	0.897376	0.732492	0.728716	1.19372	1.77282	0.821893	0.630106	0.884368	5.26511	0.912346
0.84933	1.01228	0.691159	0.776839	0.572652	1.01238	1.02649	0.845592	0.930624	0.695454	0.719475	0.950496	0.965355	0.738469	0.951877	0.932067	0.682199	0.723875		0.706626	0.745443	5.57474	0.84933
0.908782		1.339	1.35861	0.7573	1.16303	0.578287		1.08841	0.77451	0.6617	0.567385	0.430749	0.71088		0.896843	0.35448	0.607513	0.616708	0.69936	0.714694	4.77199	0.908782
0.97779	0.727088	0.822007	0.856925	0.852334	0.844492	1.43918	0.905081	2.48209	0.700234	0.830826	1.0523	0.795826		0.610304	1.1012	1.12737	1.20685	1.2163	0.957324	1.60629	4.52711	0.97779
1.10854	0.805104	1.43283	0.878638	0.479742	0.808832	0.729497	0.58298	0.76384	1.28384	0.860773	0.936968	0.862446	0.665058	0.741931	0.976967	0.813094	0.673738		0.902493	0.825855	4.42855	1.10854
0.93973	0.643455	0.829056	1.12727	0.818389	0.675877	0.821877	0.601345	0.798919		0.803186	0.993342	0.633258	1.05931	1.09382	0.605842	0.722612	0.659375	0.706929	0.739658	0.690368	5.22677	0.93973
	0.996464	0.673967	0.765117	1.08469	0.734279	1.00019	1.50132	1.02435	1.13197	0.855996	0.831492	1.37328	0.754642	0.816422		0.656	1.10302	0.807955	0.7068	0.697224	6.70852
0.859771	1.10553	1.22478	1.10046	0.881331	1.09635	0.858833	0.926461	0.982976	0.964355	1.0995	1.11532	1.19464		1.08966	0.820065	0.625279	0.915047	0.854311	1.02783	1.27978	6.83035	0.859771
0.839845		0.882036	0.721134	0.552649	0.884456	0.860495			0.691882	0.734537		1.1928	1.44041	0.708707	0.728061	0.724131	0.683375		0.704416	0.829044	4.63582	0.839845
1.02674	0.842753	1.17639	1.15467	0.618738	0.710644		1.19554	0.822638	1.19193	1.36362	1.61729	1.09195	0.631144	1.67943	1.47573	0.553124	0.712066	0.870186	1.42797	1.60346	5.14426	1.02674
Holm-Sidak's multiple comparisons test	Mean Diff.	Significant?	Summary	Adjusted P Value
WT vs. G	0.1323	No	ns	0.9315
WT vs. P	0.02638	No	ns	0.999
WT vs. A	0.02185	No	ns	0.999
WT vs. I	0.1947	No	ns	0.665
WT vs. L	0.09155	No	ns	0.9957
WT vs. V	0.08418	No	ns	0.996
WT vs. F	0.1124	No	ns	0.9957
WT vs. W	-0.07904	No	ns	0.999
WT vs. Y	0.0674	No	ns	0.9959
WT vs. M	0.1298	No	ns	0.9315
WT vs. C	0.02711	No	ns	0.999
WT vs. S	0.05533	No	ns	0.9979
WT vs. T	0.07751	No	ns	0.9977
WT vs. N	0.04259	No	ns	0.999
WT vs. Q	0.06258	No	ns	0.9977
WT vs. H	0.2228	No	ns	0.411
WT vs. K	0.09935	No	ns	0.9977
WT vs. R	0.1579	No	ns	0.9315
WT vs. D	0.1115	No	ns	0.9315
WT vs. E	0.01152	No	ns	0.999
WT vs. stop	-4.348	Yes	****	<0.0001
