# Supplementary material for: Mutational resilience of antiviral restriction favors primate TRIM5α in host-virus evolutionary arms races
Source: eLife. 2020 Sep 15;9:e59988. doi: 10.7554/eLife.59988 (PMC7492085; doi:10.7554/eLife.59988)
Supplement: Figure 6—source data 2. [file elife-59988-fig6-data2.xlsx]

## Sheet: HsT5-NMLV_Summary
	Date	Viral dose (uL)	Empty		WT		Stop		G330E		R332E		R332P		G333D		G333Y		R335A		R335E		Q337D		Q337N		V340H
Data in figure	2020-01-06	2	86.4		1.33		85.4		1.95		0.12		1.06		5.36		0.25		1.96		1		1.11		2.59		5.55
	2020-01-22	2	81.8		4.39		61.3		2.32		5.86		2.46		16.1		7.9		11.7		14		10.9		11.6		0
	2020-01-23	2	78.5		4.56		58.7		0.9		1.09		0		5.1		4.32		8.45		7.01		15.7		13.1		13.4
	2019-07-12	12.5	9.79	10.8	0.78	0.52	13.2	14.1	0.42	0.8			0.59	0.54	0.79	0.46					0.095	0.081	0.11	0.33
	2019-07-18	2	47.1	48.1	0.3	0.13	40.6	43.5	1.71	2.96	0.16	0.23	0.49	0.47	1.27	1.18	0.36	0.17			0.8	0.57	0.29	0.35

## Sheet: RhT5-NMLV_Summary
	N-MLV Fold restriction				2020-03-16	Raw data
Rhesus TRIM5 variant	2020-03-16	2020-03-19				Viral dose (uL)	Empty	Rhesus	Stop	A333W	F338K	T339D	F340D	P341G	P341I	P341K	T344E
WT	15.514	38.6727				1.0667	31.4	3.07	17.8	22	4.72	60.7*	14.7	2.18	10.3	84.7*	1.66
A333W	1.25068	0.725412				0.4267	10.4	0.5	7.9	8.79	0.54	53.3	8.17	5.87*	0.8	35.5	4.8*
F338K	12.9559	51.2				0.1707	5.16	0.099*	15.4*	4.52	0.15*	15.1	2.79	0.24	0.16	11.2	0.21
T339F	0.257248	0.325889				0.0273	0.7	0.035*	8.77*	8.37*	0.21*	2.98	9.87*	8.2*	2.97*	2.27	0.17*
F340D	1.75282	1.62577
P341I	16.0995	1.03567				Normalize % GFP to Empty vector
P341K	0.354014	26.2564					Empty	Rhesus	Stop	A333W	F338K	T339D	F340D	P341G	P341I	P341K	T344E
P341G	17.9518	5.06484				1.0667	1	10.228	1.76404	1.42727	6.65254		2.13605	14.4037	3.04854		18.9157
T344E	21.7435	33.3987				0.4267	1	20.8	1.31646	1.18316	19.2593	0.195122	1.27295		13	0.292958
T344stop	1.54025	0.873739				0.1707	1			1.14159		0.341722	1.84946	21.5	32.25	0.460714	24.5714
						0.0273	1					0.234899				0.30837
						Average	1	15.514	1.54025	1.25068	12.9559	0.257248	1.75282	17.9518	16.0995	0.354014	21.7435
					2020-03-19	Raw data
						Viral dose (uL)	Empty	Rhesus	Stop	A333W	F338K	T339F	F340D	P341G	P341I	P341K	T344E
						1.0667	51.2	1.38	55.2*	59.2*	1	59.2*	35	11.5	48.8	1.95	1.53
						0.4267	33	0.82	34.2	40.9	0.65*	59*	17.7	6.36	30	1.34*	0.99
						0.1707	16	0.49*	16.5	21.5	0.29*	44.8	10	2.97	15.5	0.9*	0.49*
						0.0683	7.69	0.38*	11.2	12.3	0.25*	26.1	4.88	1.47	8	0.68*	0.26*
						Normalize % GFP to Empty vector
							Empty	Rhesus	Stop	A333W	F338K	T339D	F340D	P341G	P341I	P341K	T344E
						1.0667	1	37.1014			51.2		1.46286	4.45217	1.04918	26.2564	33.4641
						0.4267	1	40.2439	0.964912	0.806846			1.86441	5.18868	1.1		33.3333
						0.1707	1		0.969697	0.744186		0.357143	1.6	5.38721	1.03226
						0.0683	1		0.686607	0.625203		0.294636	1.57582	5.23129	0.96125
						Average	1	38.6727	0.873739	0.725412	51.2	0.325889	1.62577	5.06484	1.03567	26.2564	33.3987
